# Supplementary material for: Readily functionalizable phosphonium-tagged fluorescent coumarins for enhanced detection of conjugates by mass spectrometry
Source: Royal Society of Chemistry journal article supplement (doi:10.1039/c6ob01080f), 2016-01-01
Supplement: c6ob01080f1.pdf [file c6ob01080f1.pdf]

## Electronic Supplementary Information

### Readily functionalizable phosphonium-tagged fluorescent coumarins for enhanced detection of bioconjugates by mass spectrometry

Antoine Lizzul-Jurse, Laetitia Bailly, Marie Hubert-Roux, Carlos Afonso, Pierre-Yves Renard, Cyrille Sabot\*

---

Normandie Univ, COBRA, UMR 6014 & FR 3038; Univ Rouen; INSA Rouen; CNRS, 1 rue Tesnière 76821 Mont-Saint-Aignan, Cedex (France).  
E-mail : cyrille.sabot@univ-rouen.fr

### Table of contents

|                                                                                                                                            |    |
|--------------------------------------------------------------------------------------------------------------------------------------------|----|
| 1) Copies of $^1\text{H}$ NMR, $^{13}\text{C}$ NMR spectra.....                                                                            | 2  |
| 2) RP-HPLC elution profiles.....                                                                                                           | 24 |
| 3) Spectroscopic data .....                                                                                                                | 33 |
| 1) Absorption, excitation, emission spectra of coumarin derivatives .....                                                                  | 33 |
| 2) Absorption of the quencher, emission of coumarins <b>2</b> and <b>7</b> spectra superimposition.....                                    | 37 |
| 3) Quenching efficiency and fluorescence exaltation of probes <b>19</b> and <b>20</b> after BACE-1 hydrolysis .....                        | 38 |
| 4) Quenching efficiency and fluorescence exaltation of probes <b>19</b> and <b>20</b> after $\alpha$ -Chymotrypsin hydrolysis .....        | 39 |
| 5) Absorption, excitation, emission spectra of naphthalimide derivatives .....                                                             | 40 |
| 6) Absorption, excitation, emission spectra of labeled BSA .....                                                                           | 41 |
| 7) Determination of <i>F/P</i> ratio of labeled BSA .....                                                                                  | 41 |
| 4) Mass analyses.....                                                                                                                      | 42 |
| 1) ESI-MS analysis of a $2.17 \times 10^2 \mu\text{M}$ solution of coumarins <b>1</b> - <b>5</b> - <b>6</b> in a 1:1:1 molar ratio.....    | 42 |
| 2) ESI-MS analysis of a $5 \times 10^2 \mu\text{M}$ solution of peptide <b>16-17</b> in a 1:1 molar ratio .....                            | 43 |
| 3) ESI-MS analysis of a $2.17 \times 10^2 \mu\text{M}$ solution of <b>28</b> and <b>29</b> in a 1:1 molar ratio.....                       | 44 |
| 4) LC -MS analysis of the crude BACE1-mediated hydrolysis (solution of <b>19</b> and <b>20</b> at $25 \mu\text{M}$ ).....                  | 45 |
| 5) LC -MS analysis of the crude $\alpha$ -Chymotrypsin-mediated hydrolysis (solution of <b>19</b> and <b>20</b> at $25 \mu\text{M}$ )..... | 49 |
| 6) MALDI-TOF analysis of unlabeled and labeled BSA protein. ....                                                                           | 52 |
| 7) MALDI mass spectra of Chymotrypsin and Trypsin digests of modified BSA. ....                                                            | 53 |

# 1) Copies of $^1\text{H}$ NMR, $^{13}\text{C}$ NMR spectra

## Methyl 2-(7-methoxy-2-oxo-2H-chromen-4-yl)acetate 1

$^1\text{H}$  NMR spectrum in  $\text{CDCl}_3$  (300 MHz)

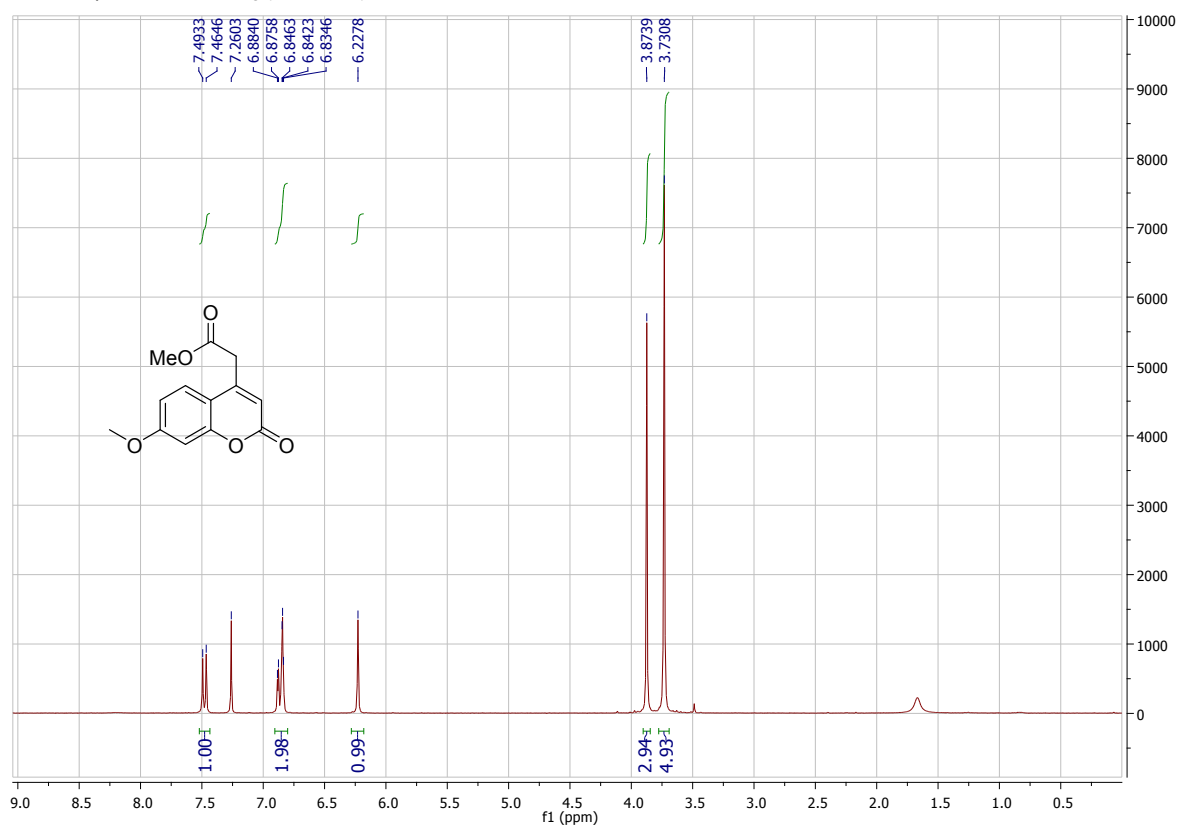

$^{13}\text{C}$  NMR spectrum in  $\text{CDCl}_3$  (75 MHz)

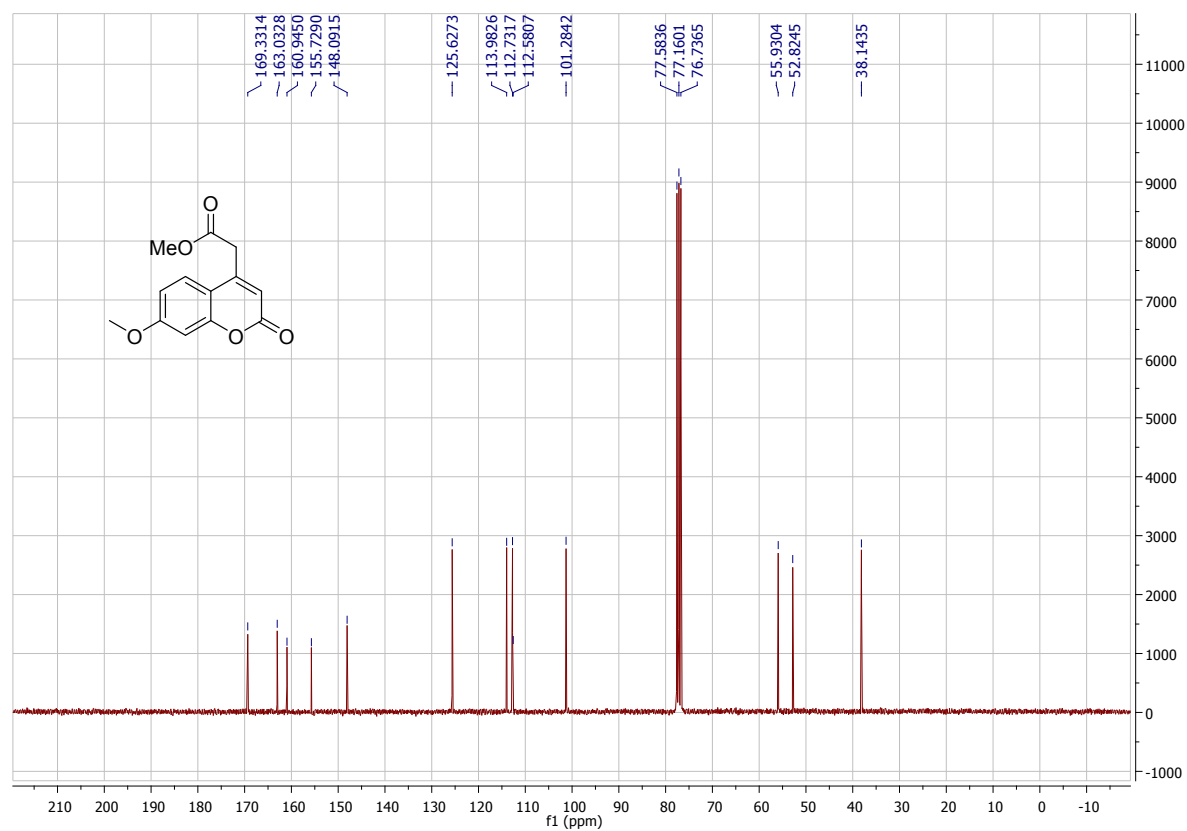

## 2-(7-Methoxy-2-oxo-2H-chromen-4-yl)acetic acid 2

$^1\text{H}$  NMR spectrum in  $(\text{CD}_3)_2\text{CO}$  (300 MHz)

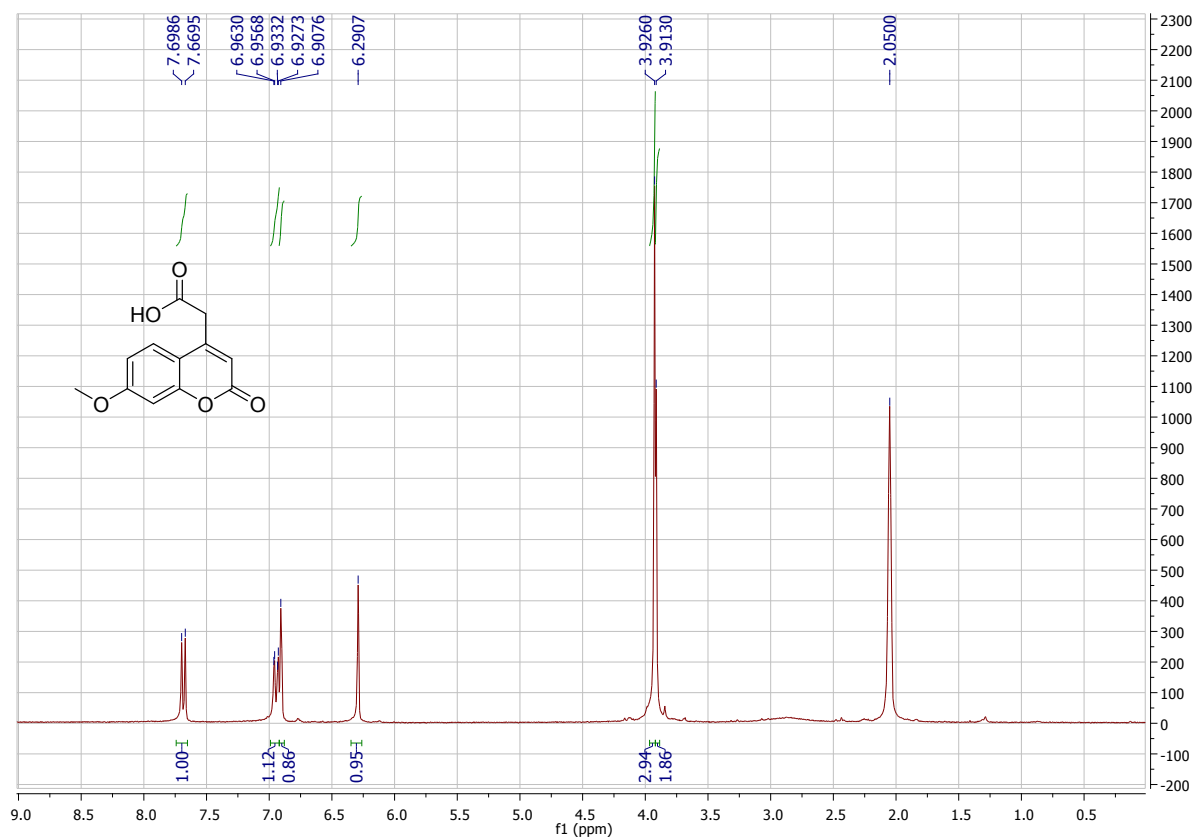

### Methyl 2-(7-hydroxy-2-oxo-2H-chromen-4-yl)acetate 3

$^1\text{H}$  NMR spectrum in  $(\text{CD}_3)_2\text{SO}$  (300 MHz)

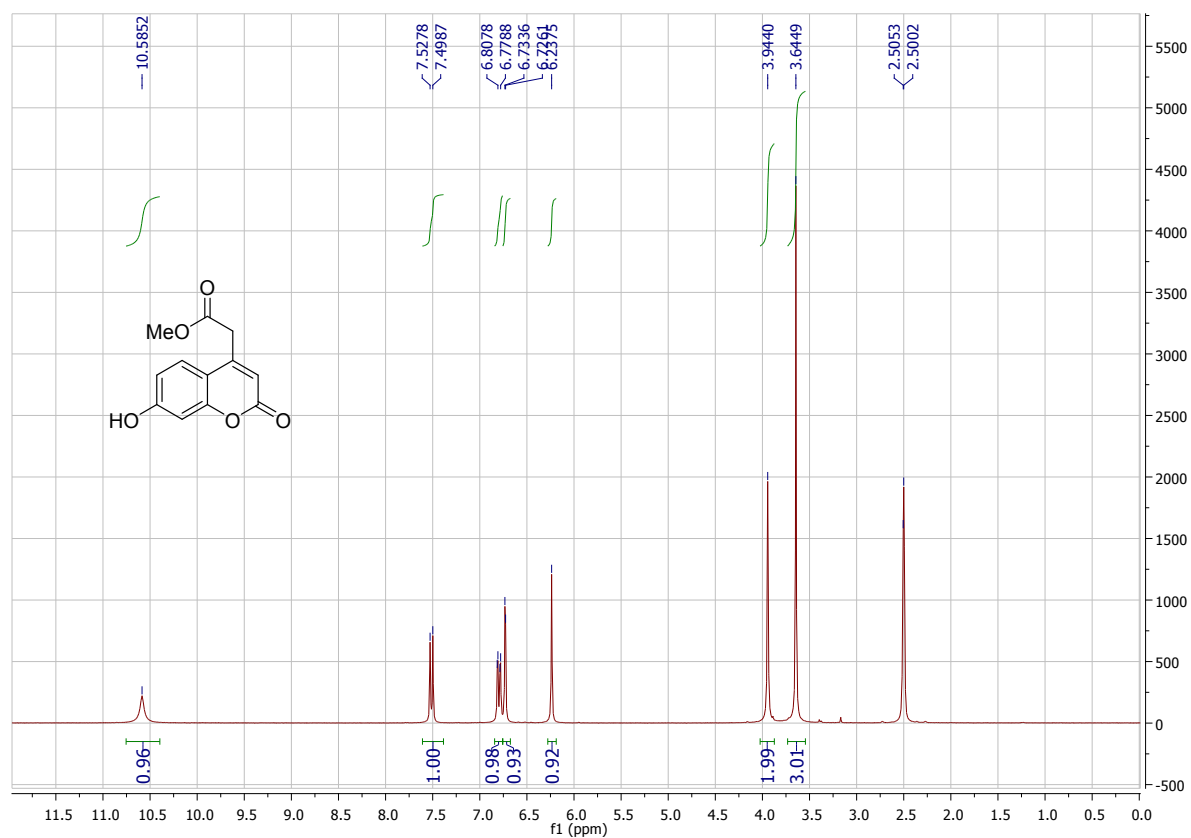

### Methyl 2-(7-(3-bromopropoxy)-2-oxo-2H-chromen-4-yl)-acetate 4

<sup>1</sup>H NMR spectrum in CDCl<sub>3</sub> (300 MHz)

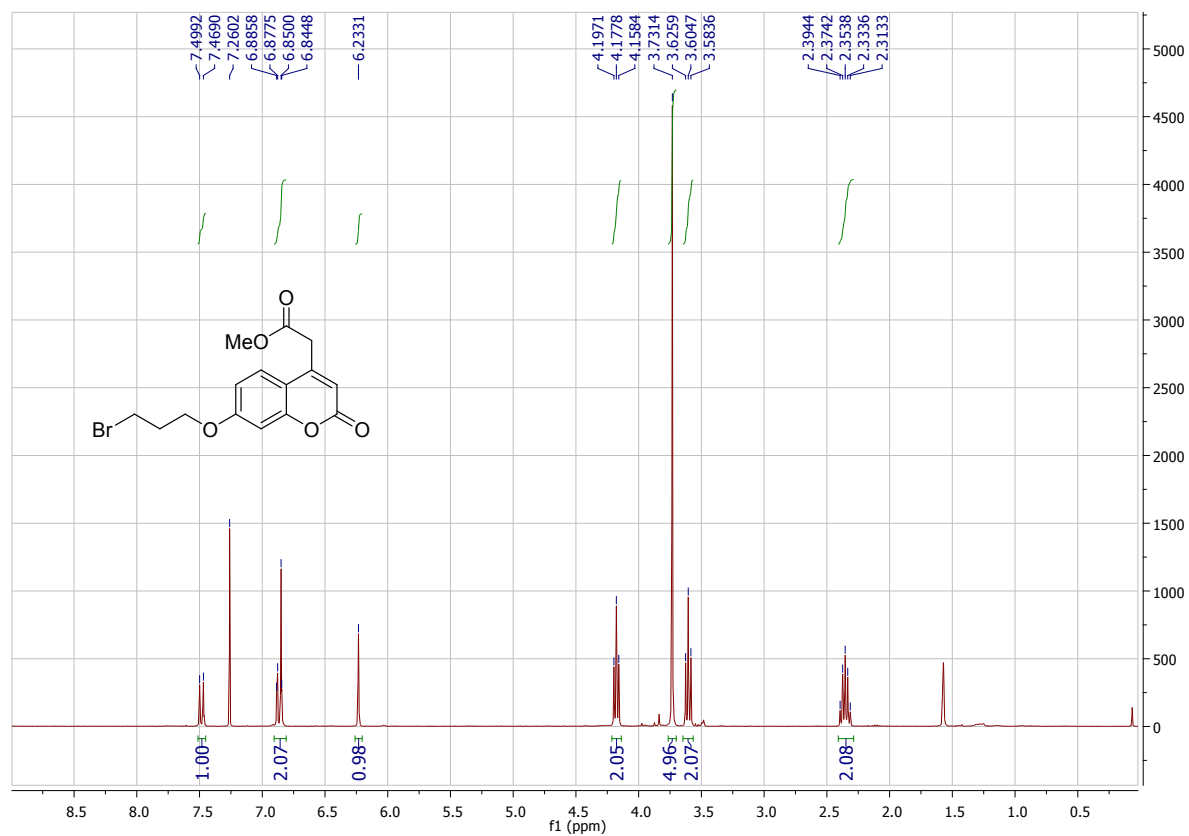

<sup>13</sup>C NMR spectrum in CDCl<sub>3</sub> (75 MHz)

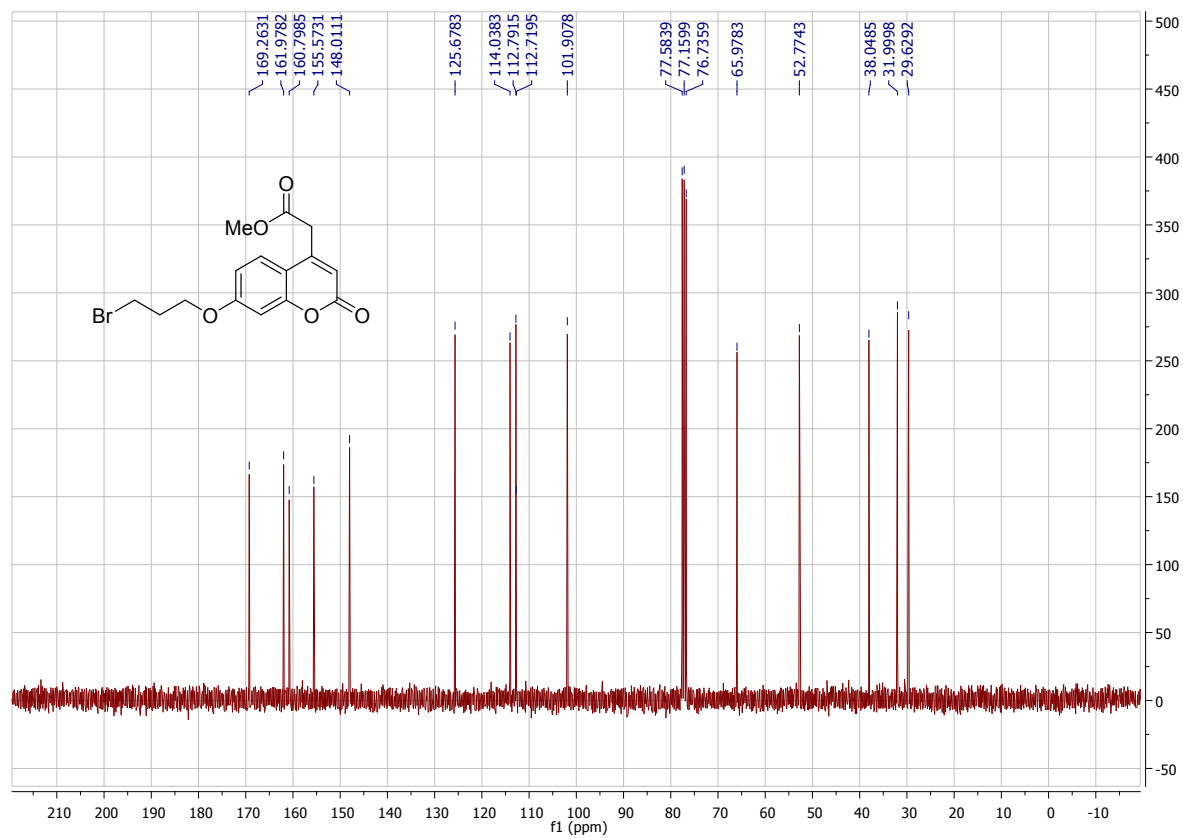

**(3-((4-(2-methoxy-2-oxoethyl)-2-oxo-2H-chromen-7yl)oxy)propyl)triphenylphosphonium bromide 5**

<sup>1</sup>H NMR spectrum in CDCl<sub>3</sub> (300 MHz)

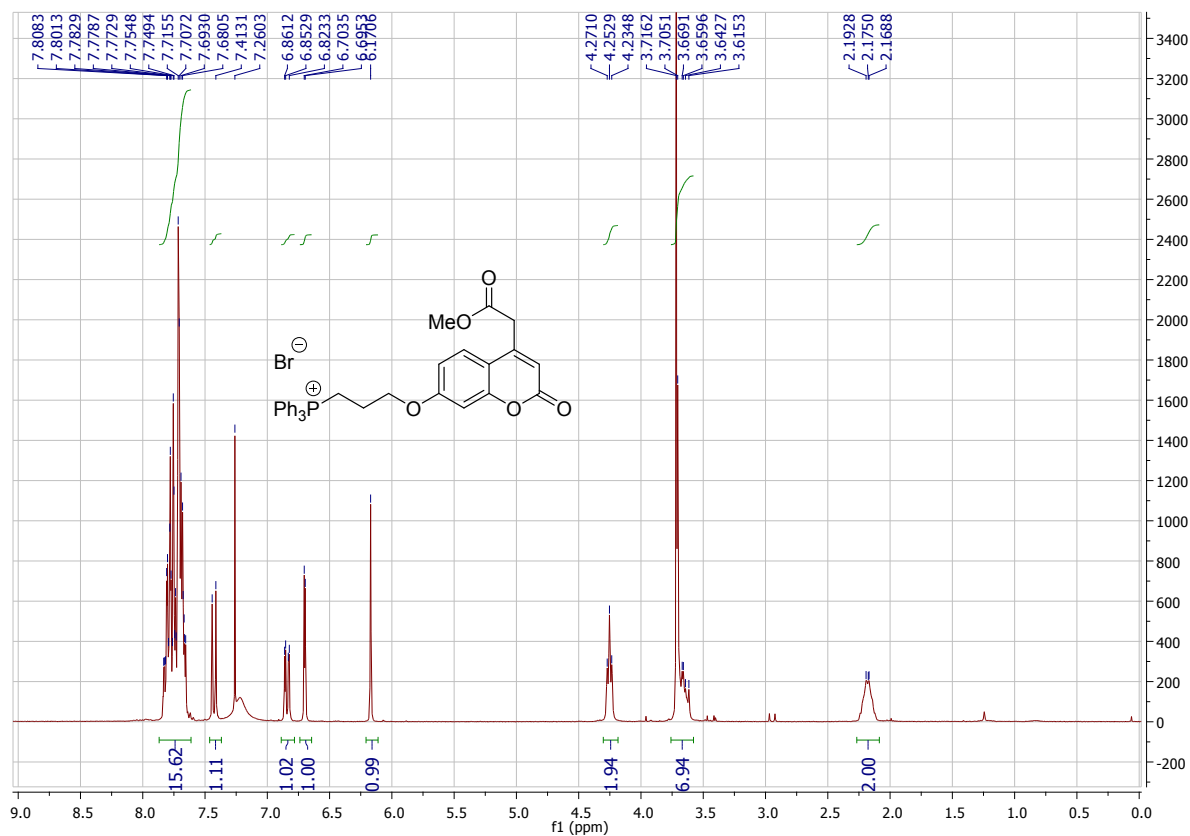

<sup>13</sup>C NMR spectrum in CDCl<sub>3</sub> (75 MHz)

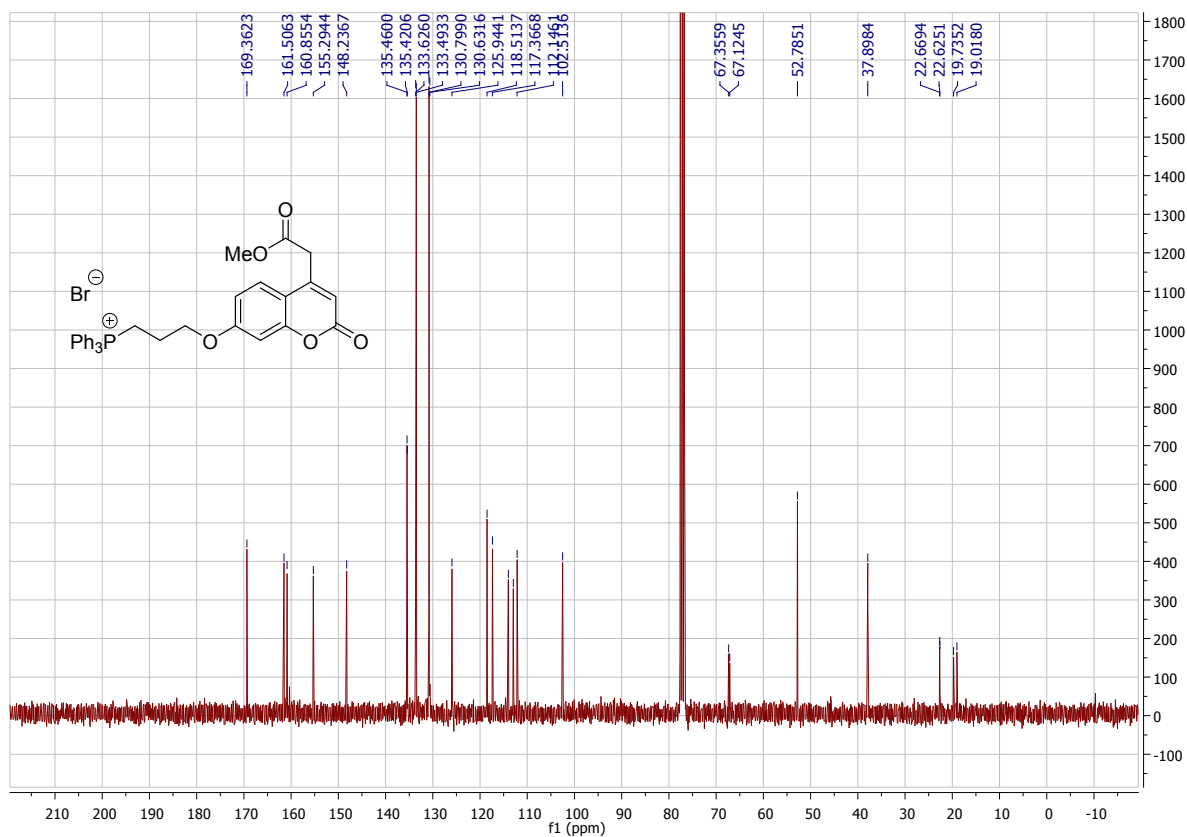

### 3-((4-(2-methoxy-2-oxoethyl)-2-oxo-2H-chromen-7-yl)oxy)-N,N,N-trimethylpropan-1-aminium bromide 6

$^1\text{H}$  NMR spectrum in  $\text{CD}_3\text{OD}$  (300 MHz)

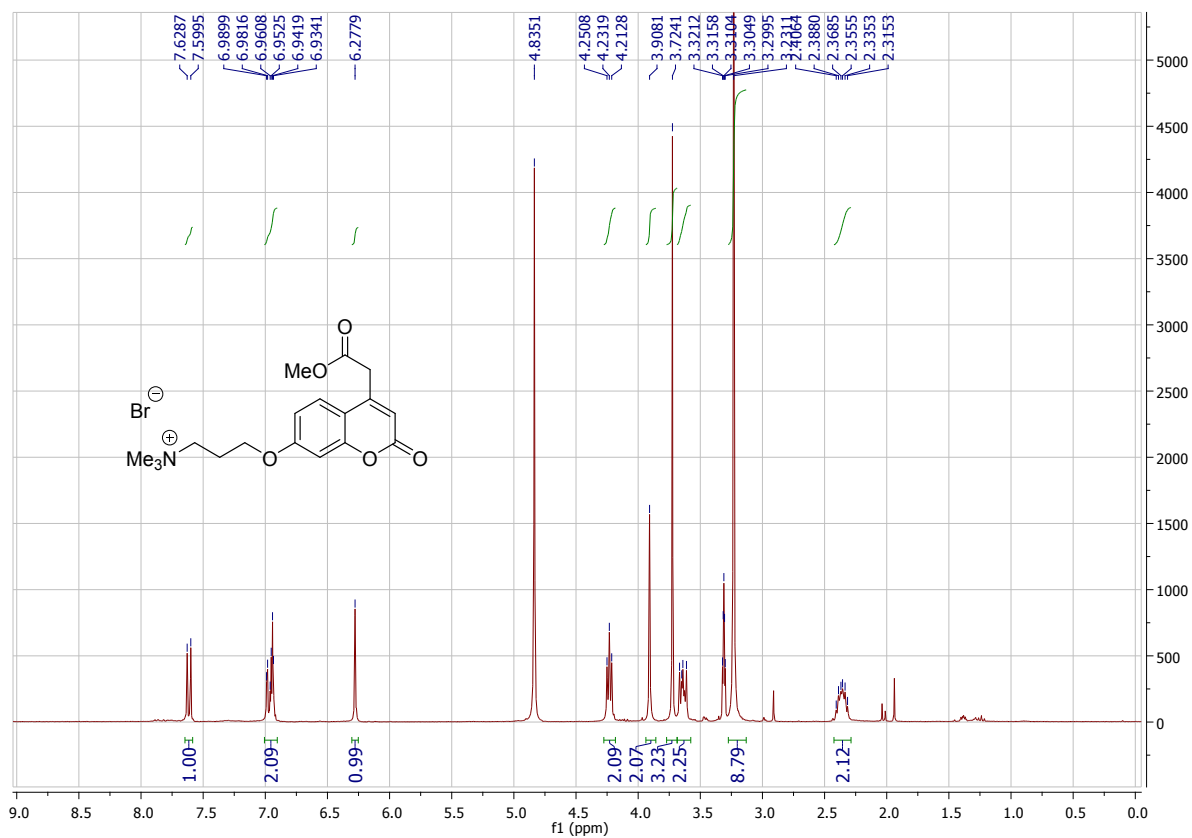

$^{13}\text{C}$  NMR spectrum in  $\text{CD}_3\text{OD}$  (75 MHz)

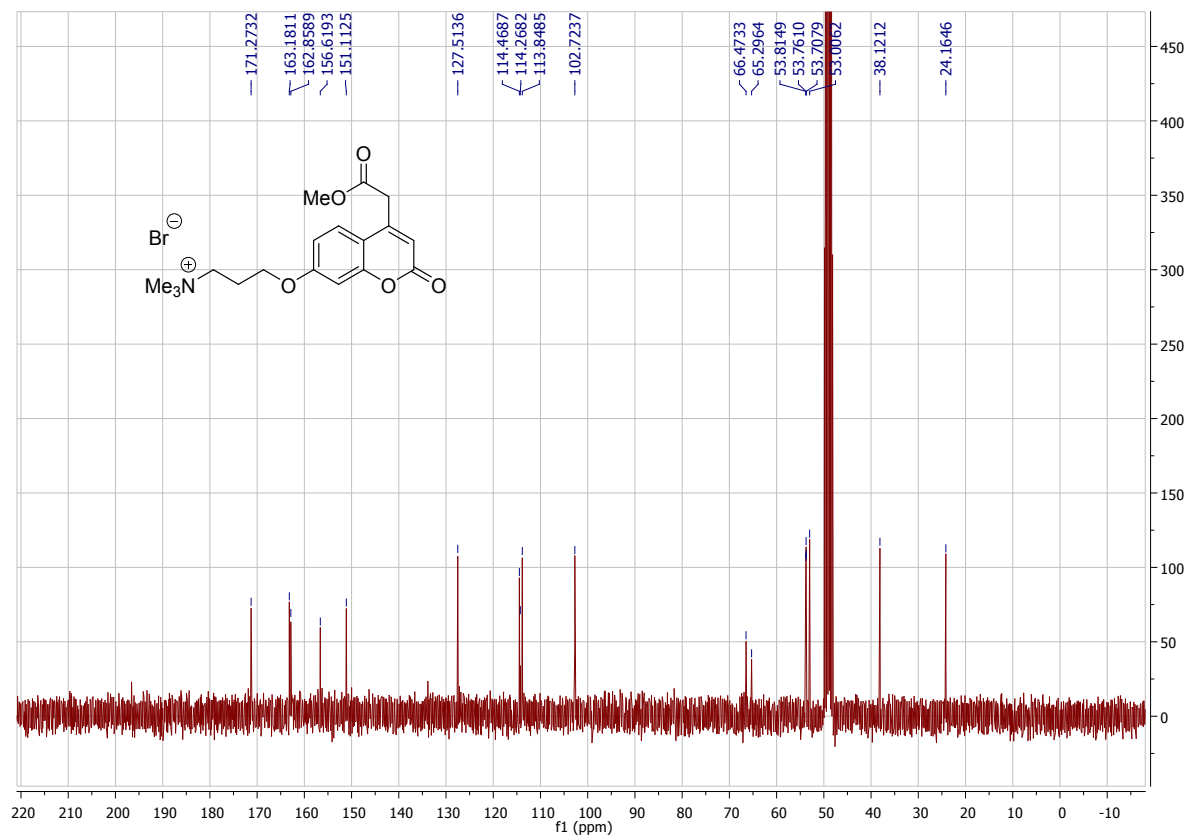

**(3-((4-(carboxymethyl)-2-oxo-2H-chromen-7-yl)oxy)propyl)-triphenylphosphonium bromide 7**

<sup>1</sup>H NMR spectrum in CD<sub>3</sub>OD (300 MHz)

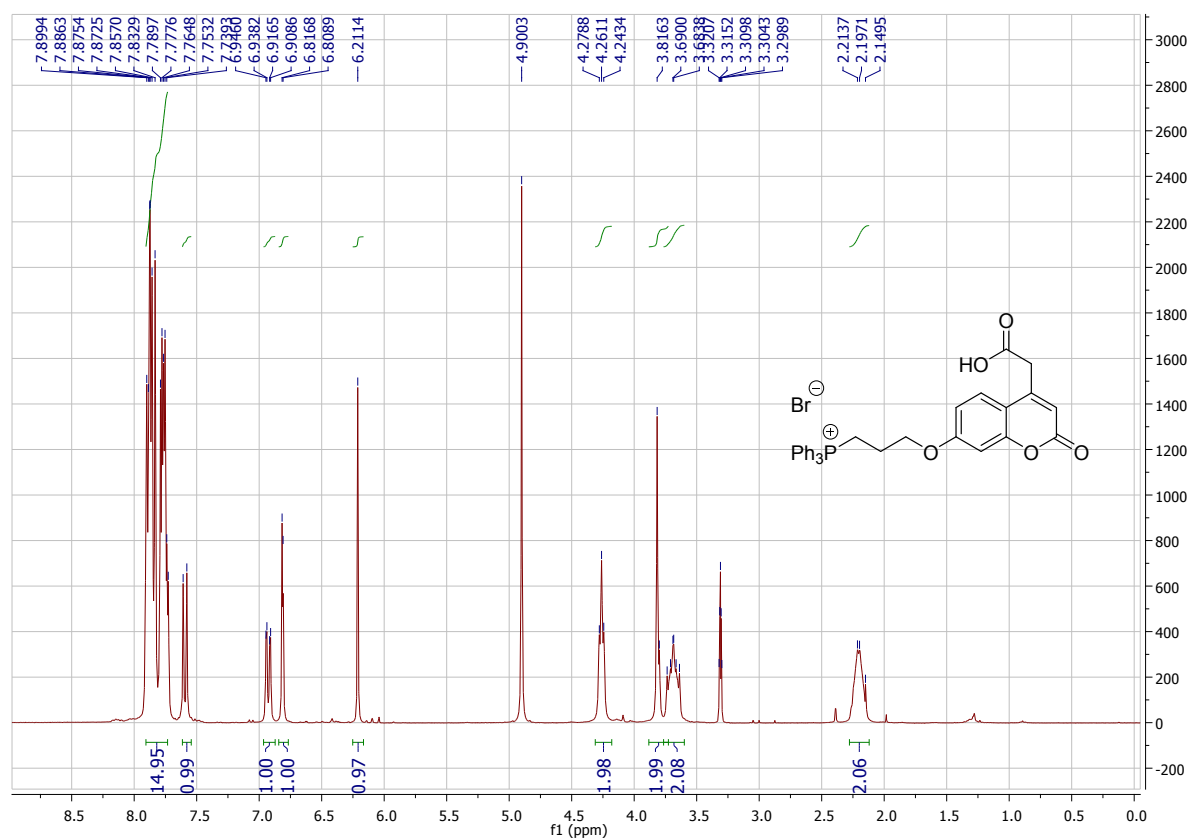

<sup>13</sup>C NMR spectrum in CD<sub>3</sub>OD (75 MHz)

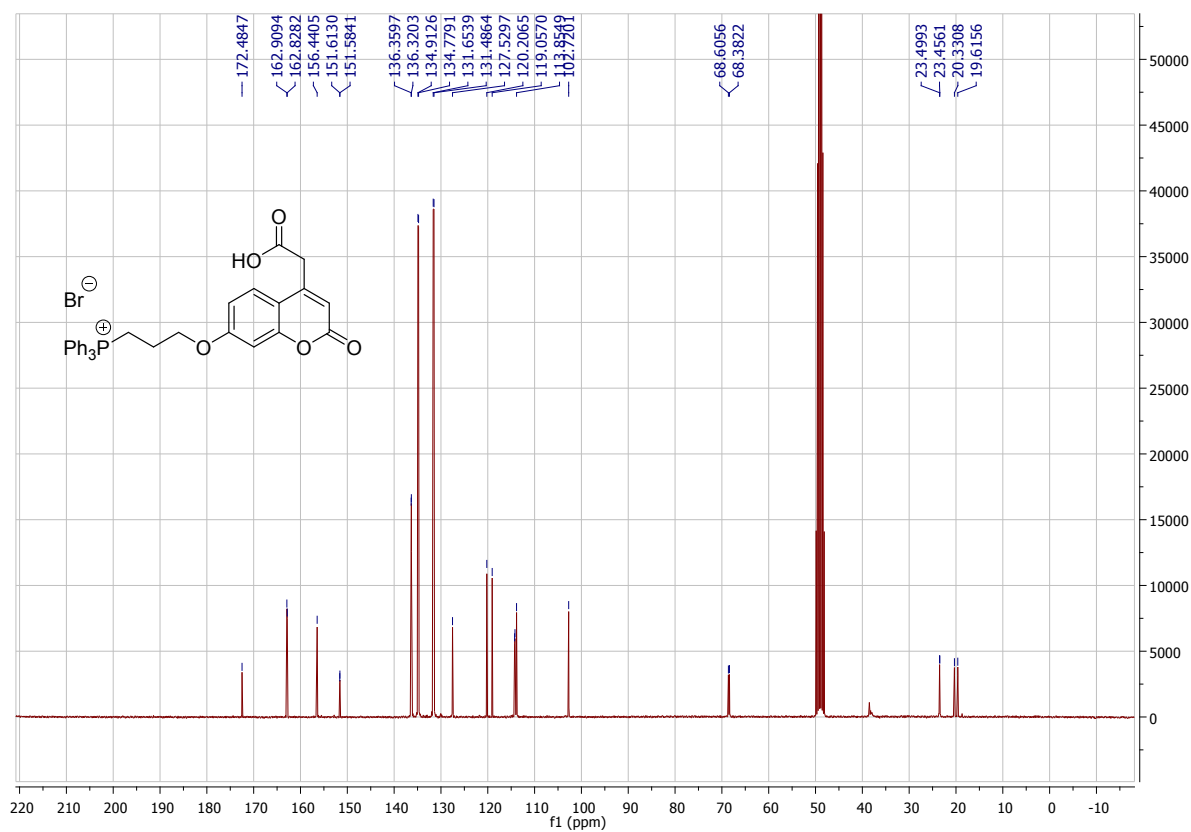



### 2-(7-(3-bromopropoxy)-2-oxo-2H-chromen-4-yl)acetic acid **8**

$^1\text{H}$  NMR spectrum in  $(\text{CD}_3)_2\text{CO}$  (300 MHz)

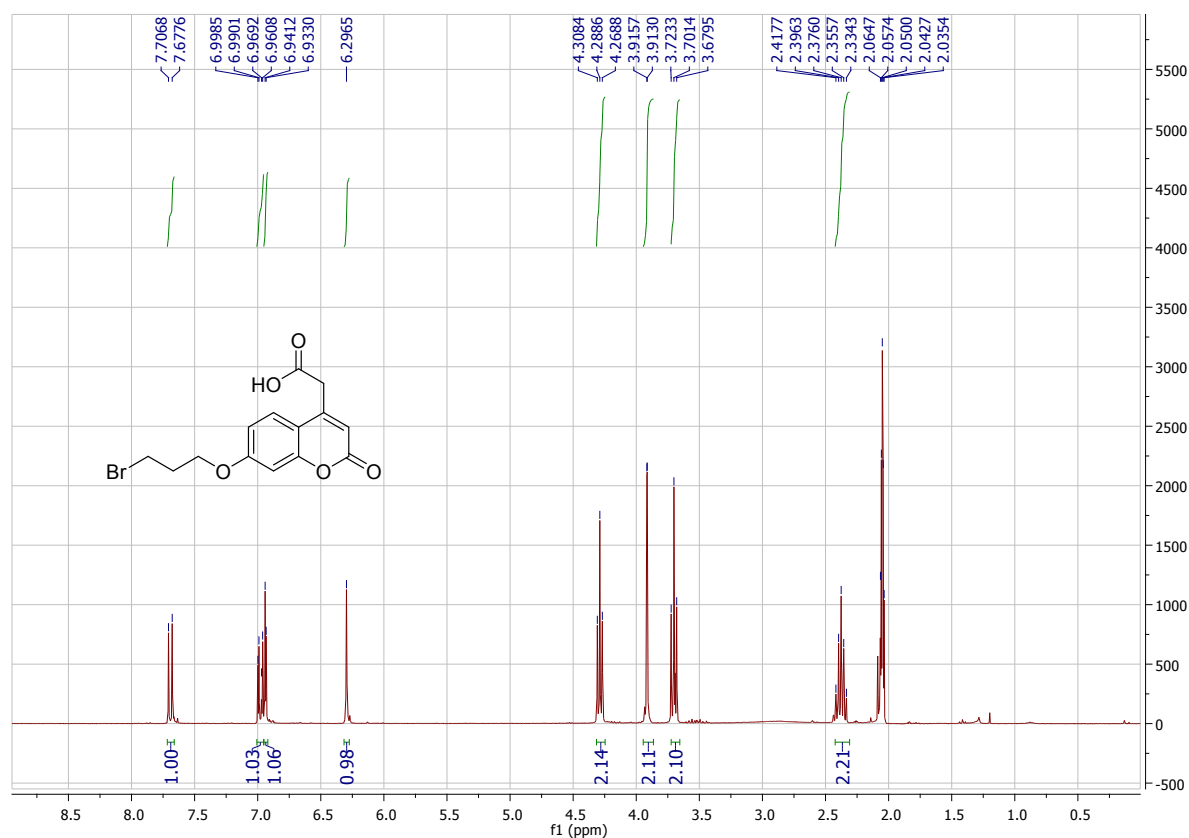

$^{13}\text{C}$  NMR spectrum in  $(\text{CD}_3)_2\text{CO}$  (75 MHz)

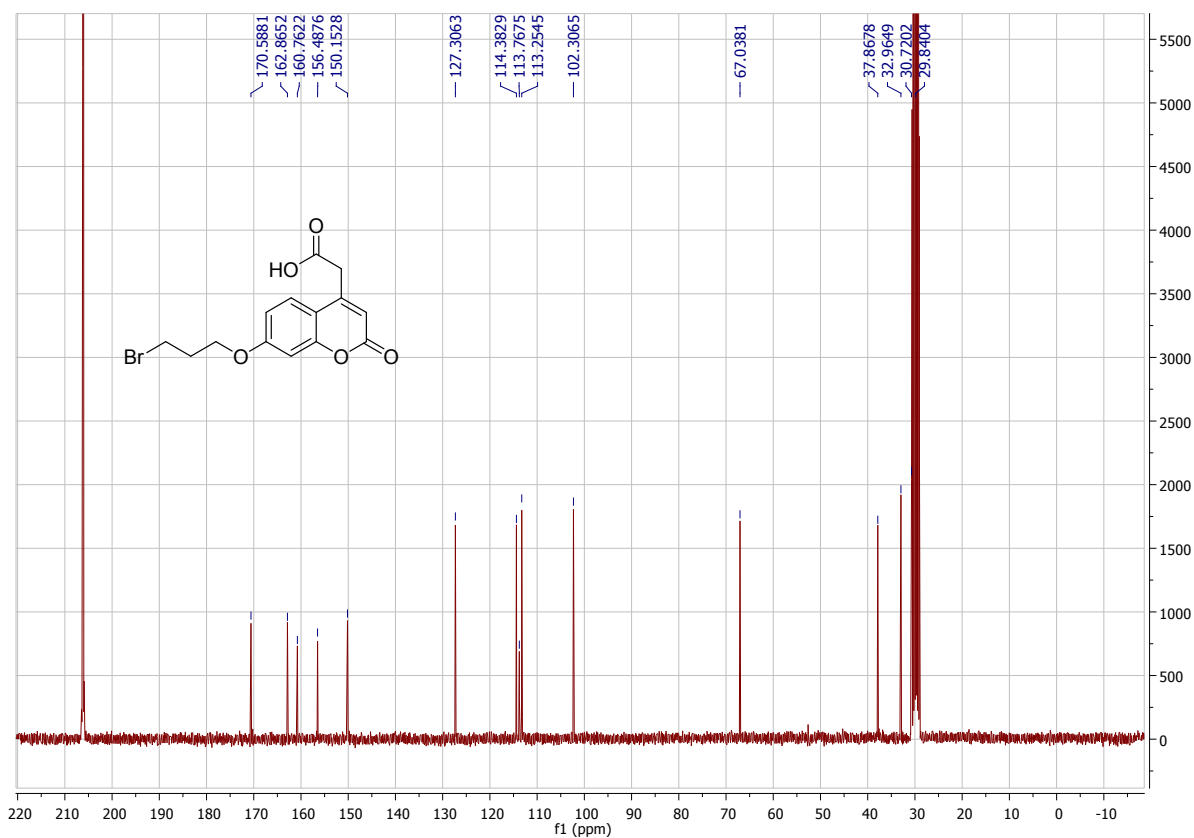

**2-(7-(3-bromopropoxy)-2-oxo-2H-chromen-4-yl)-N-(prop-2-yn-1-yl)acetamide 9**

$^1\text{H}$  NMR spectrum in  $(\text{CD}_3)_2\text{CO}$  (300 MHz)

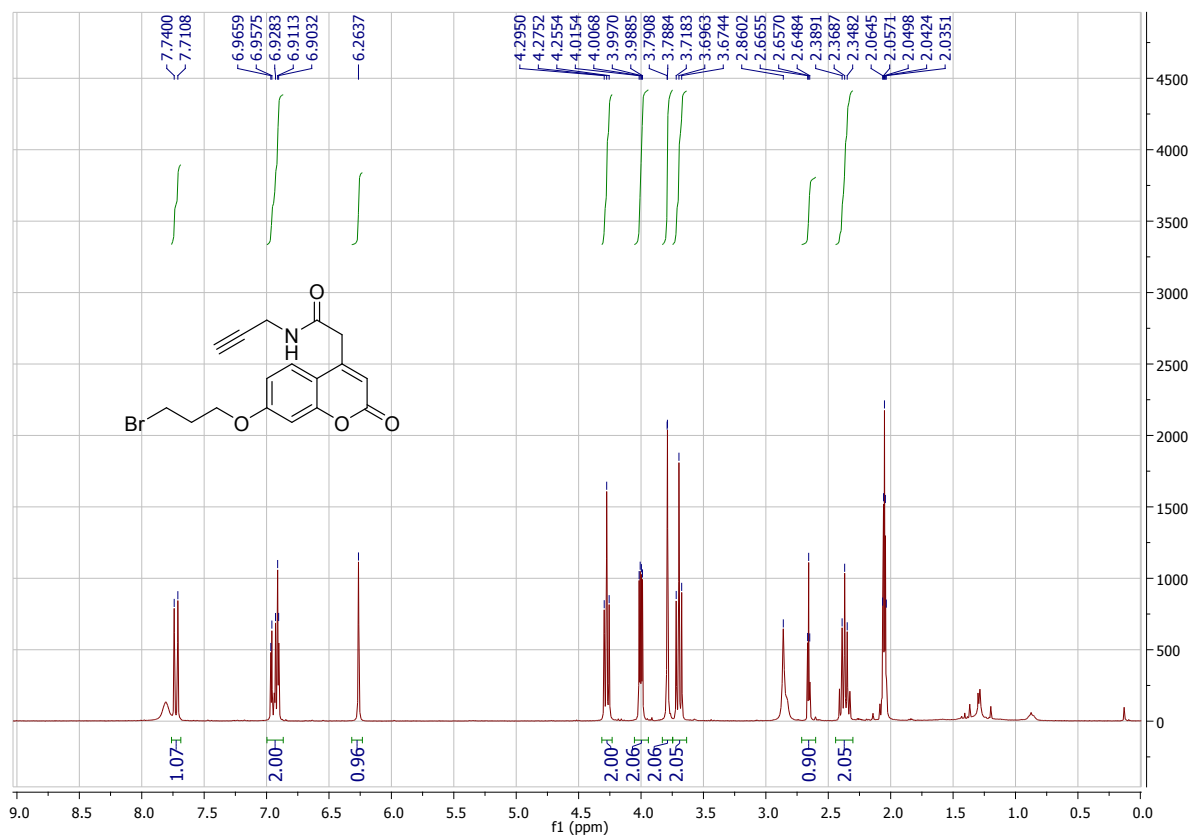

$^{13}\text{C}$  NMR spectrum in  $(\text{CD}_3)_2\text{CO}$  (75 MHz)

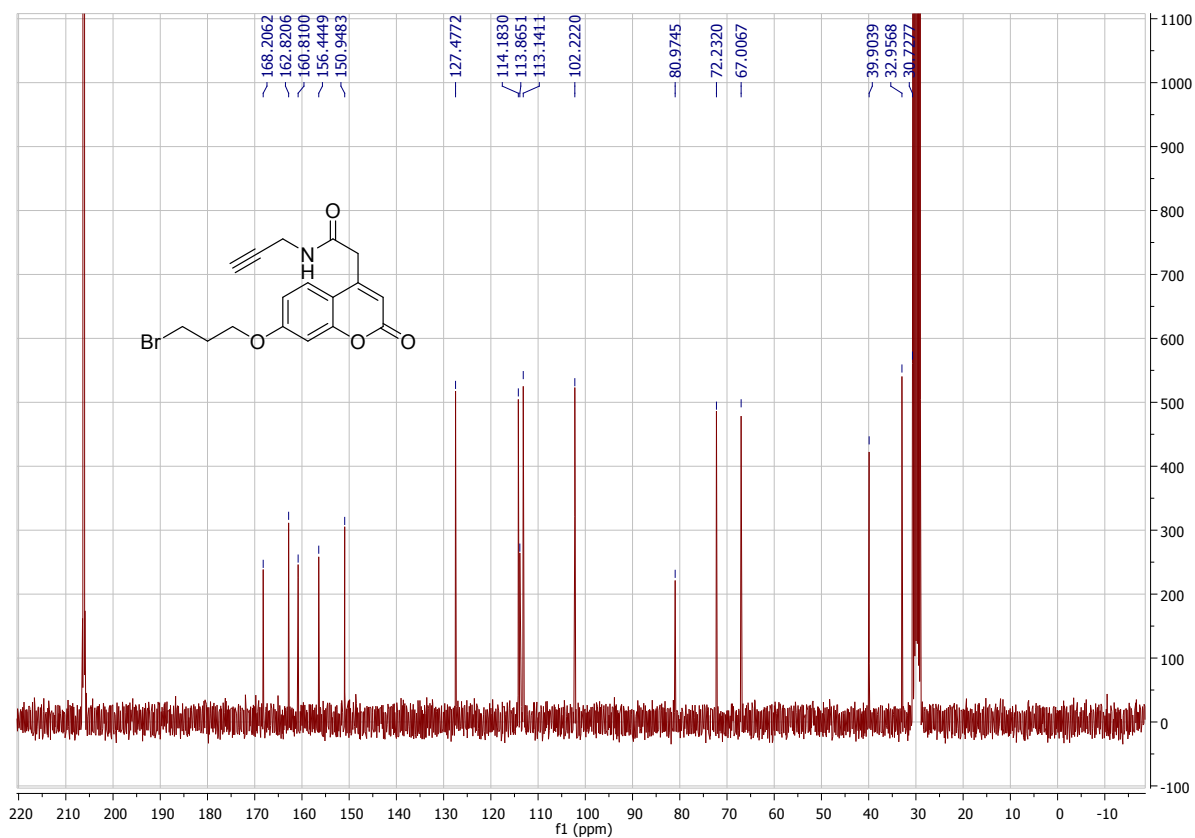

**(3-((2-oxo-4-(2-oxo-2-(prop-2-yn-1-ylamino)ethyl)-2H-chromen-7-yl)oxy)propyl)triphenylphosphonium bromide 10**  
<sup>1</sup>H NMR spectrum in CD<sub>3</sub>CN (300 MHz)

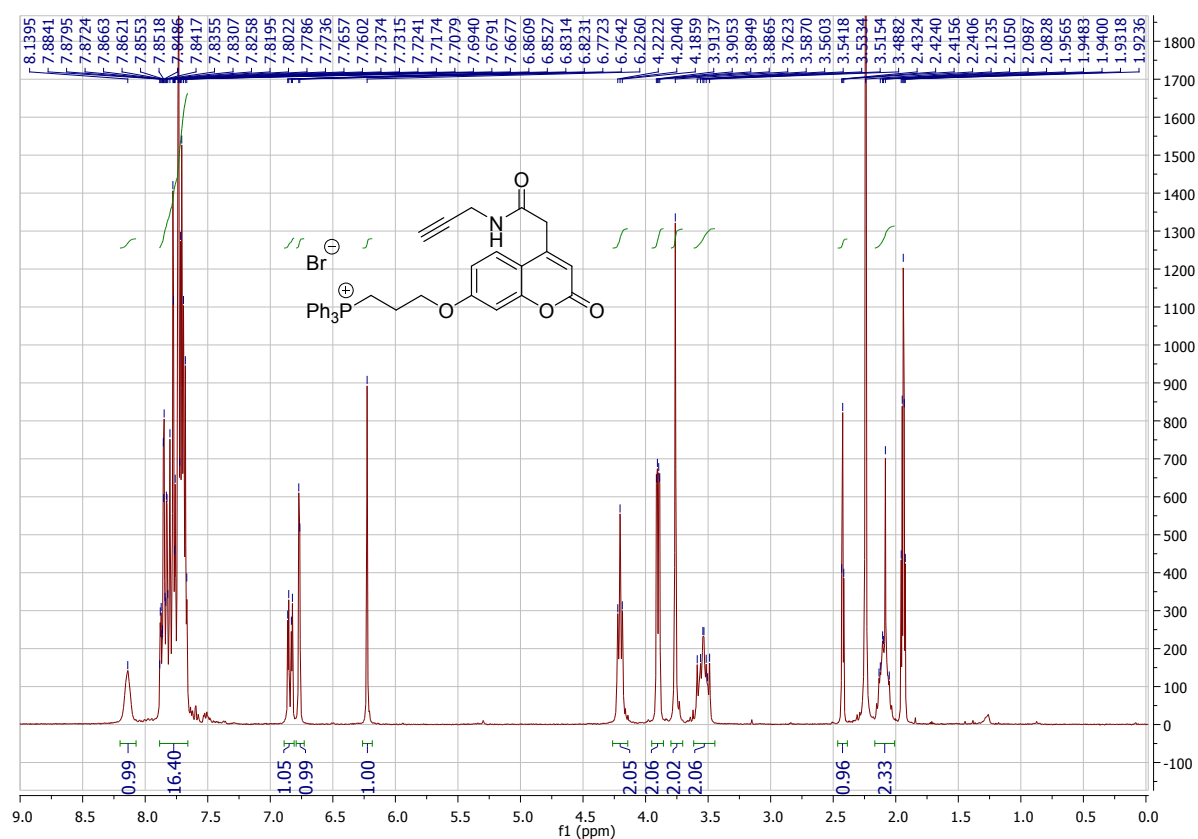

<sup>13</sup>C NMR spectrum in CD<sub>3</sub>CN (75 MHz)

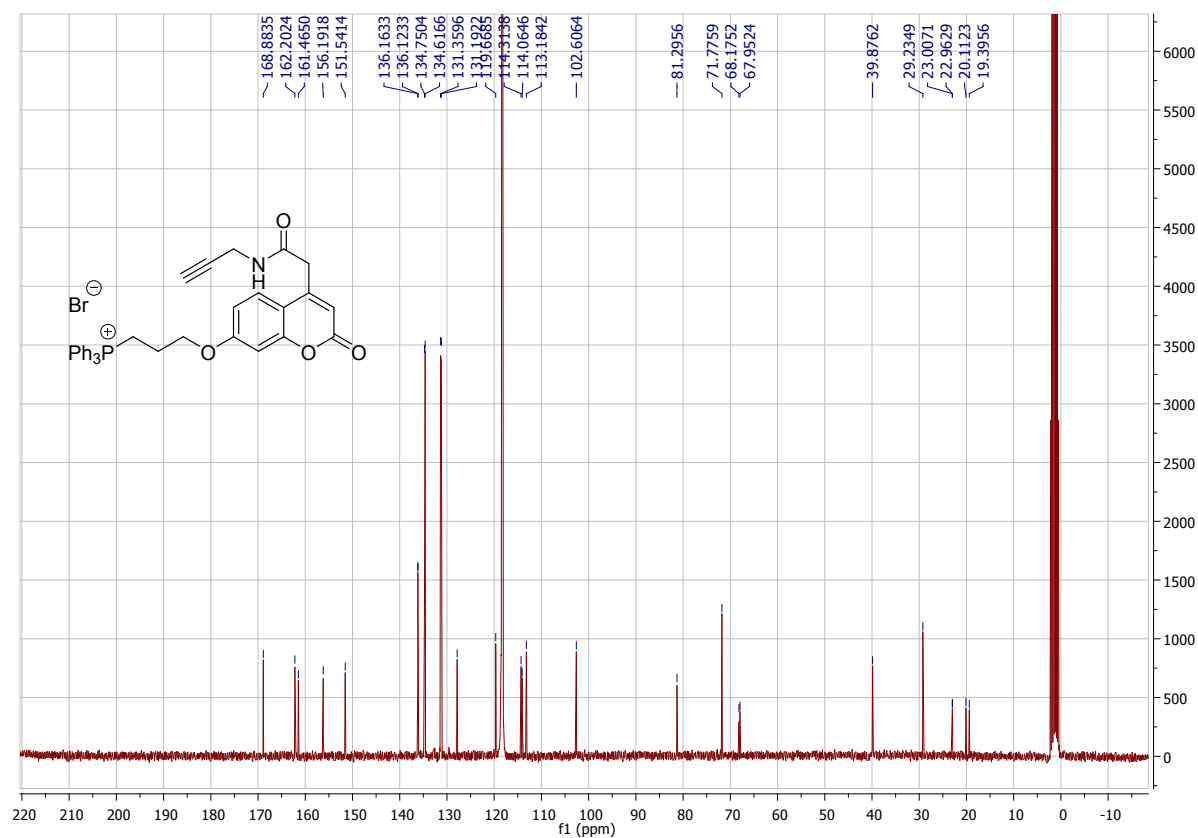

**Tert-butyl (3-(2-(7-(3-bromopropoxy)-2-oxo-2H-chromen-4-yl)acetamido)propyl)carbamate 11**

<sup>1</sup>H NMR spectrum in CDCl<sub>3</sub> (300 MHz)

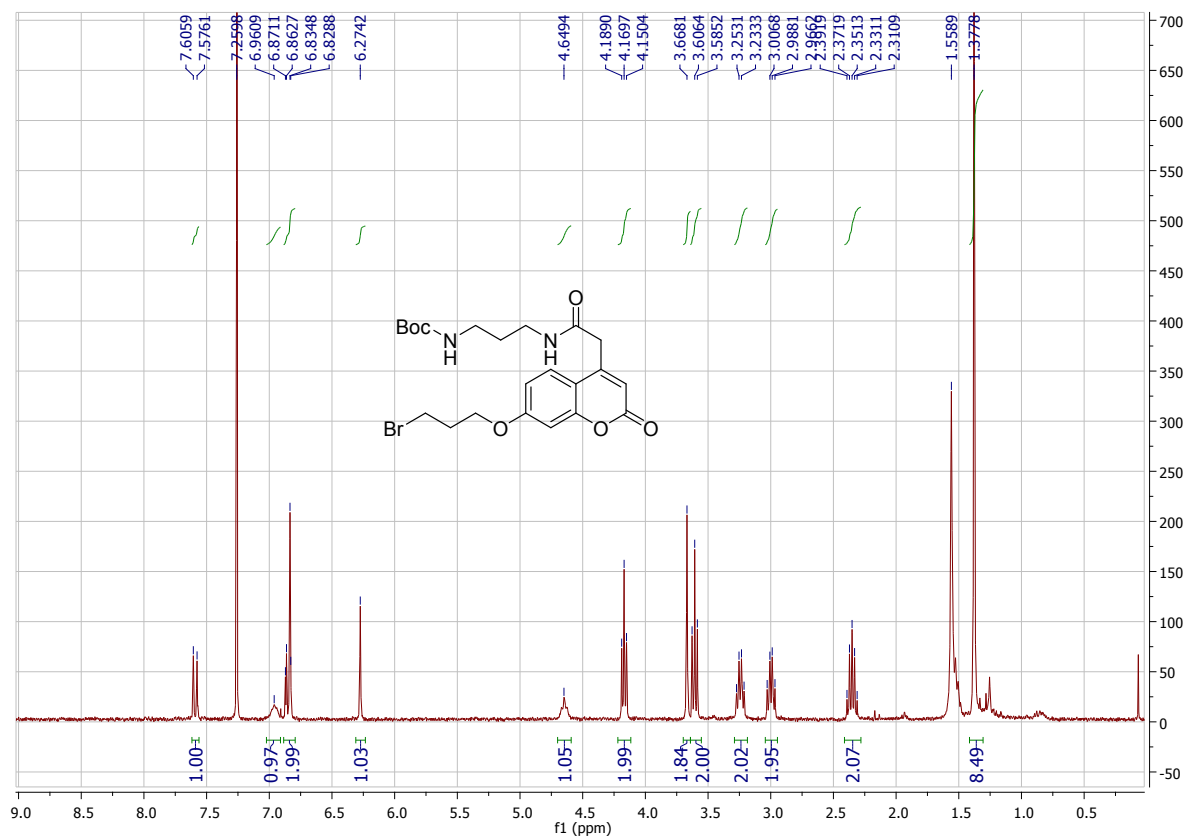

<sup>13</sup>C NMR spectrum in CDCl<sub>3</sub> (75 MHz)

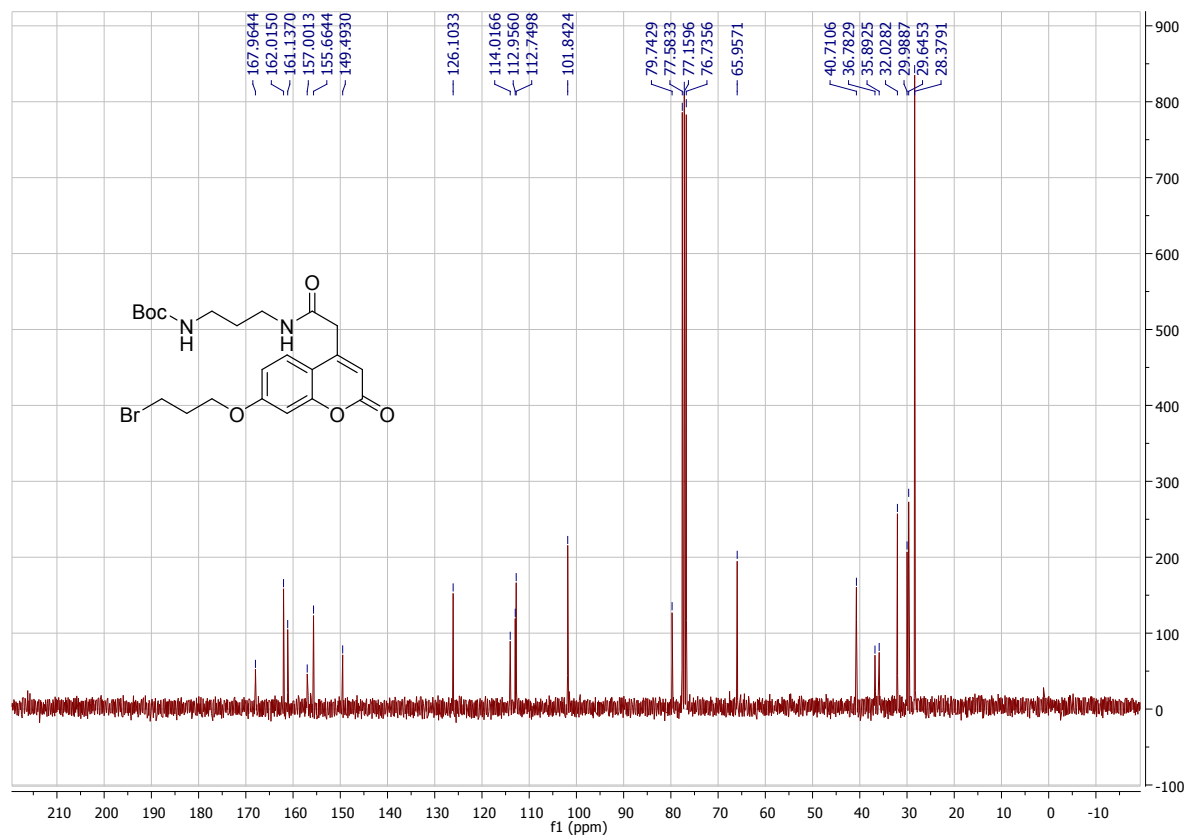

**tert-butyl (3-(2-(2-oxo-7-(3-(triphenyl-1*l*-phosphanyl)propoxy)-2H-chromen-4-yl)acetamido)propyl)carbamate 12**

<sup>1</sup>H NMR spectrum in CDCl<sub>3</sub> (300 MHz)

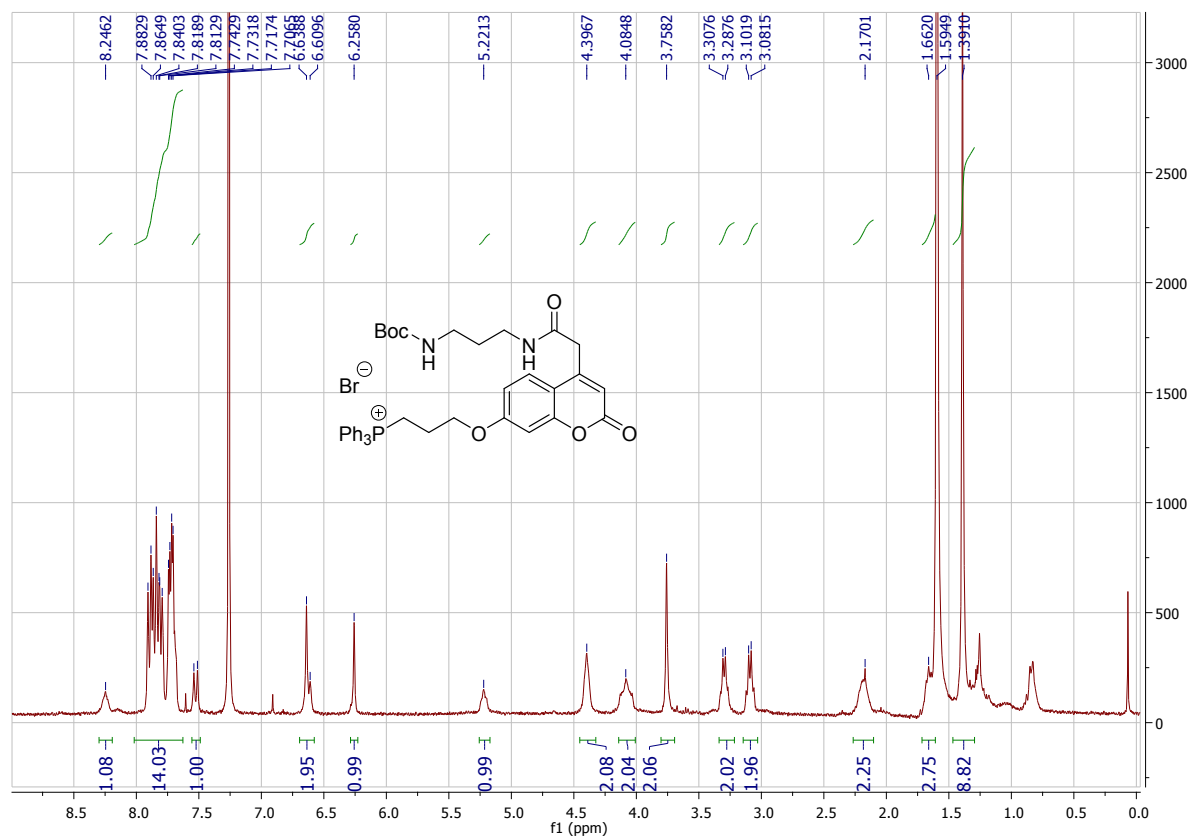

<sup>13</sup>C NMR spectrum in CDCl<sub>3</sub> (75 MHz)

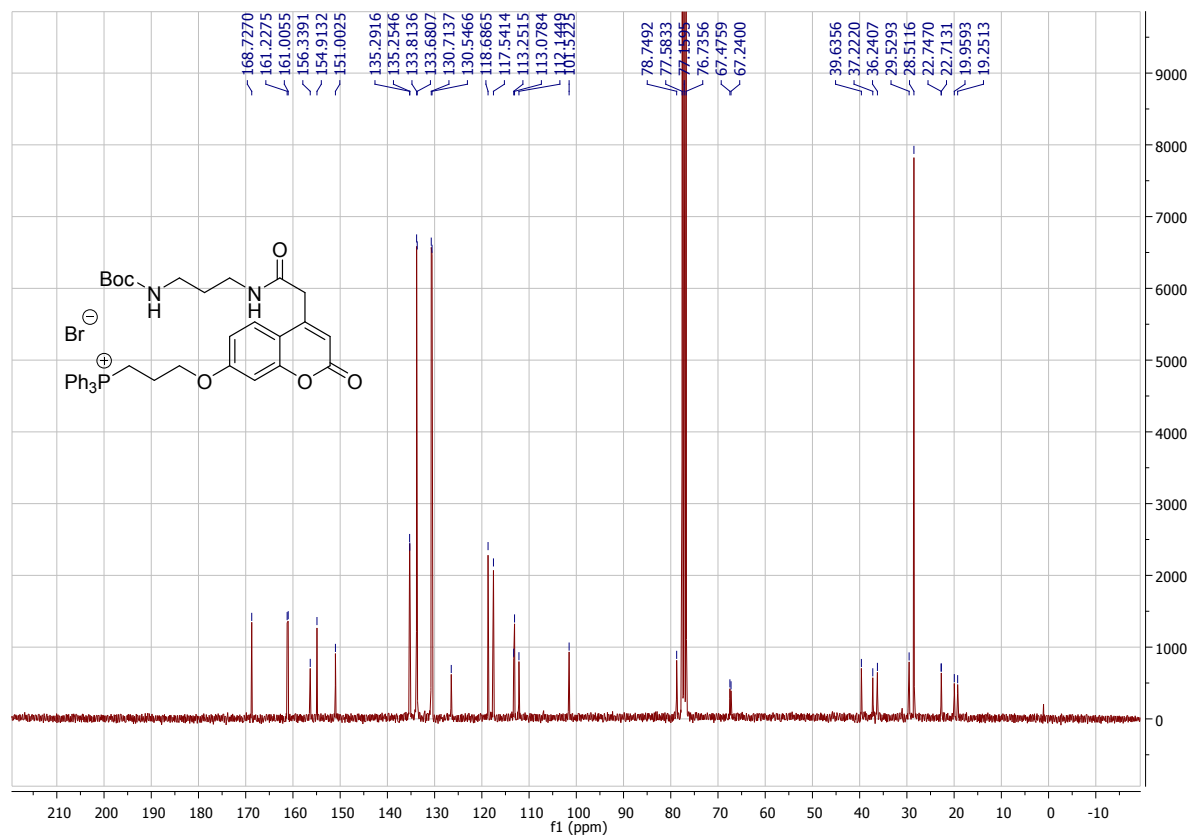

**(3-((4-(2-((3-aminopropyl)amino)-2-oxoethyl)-2-oxo-2H-chromen-7-yl)oxy)propyl)triphenyl-phosphonium bromide 13**

<sup>1</sup>H NMR spectrum in CD<sub>3</sub>OD (300 MHz)

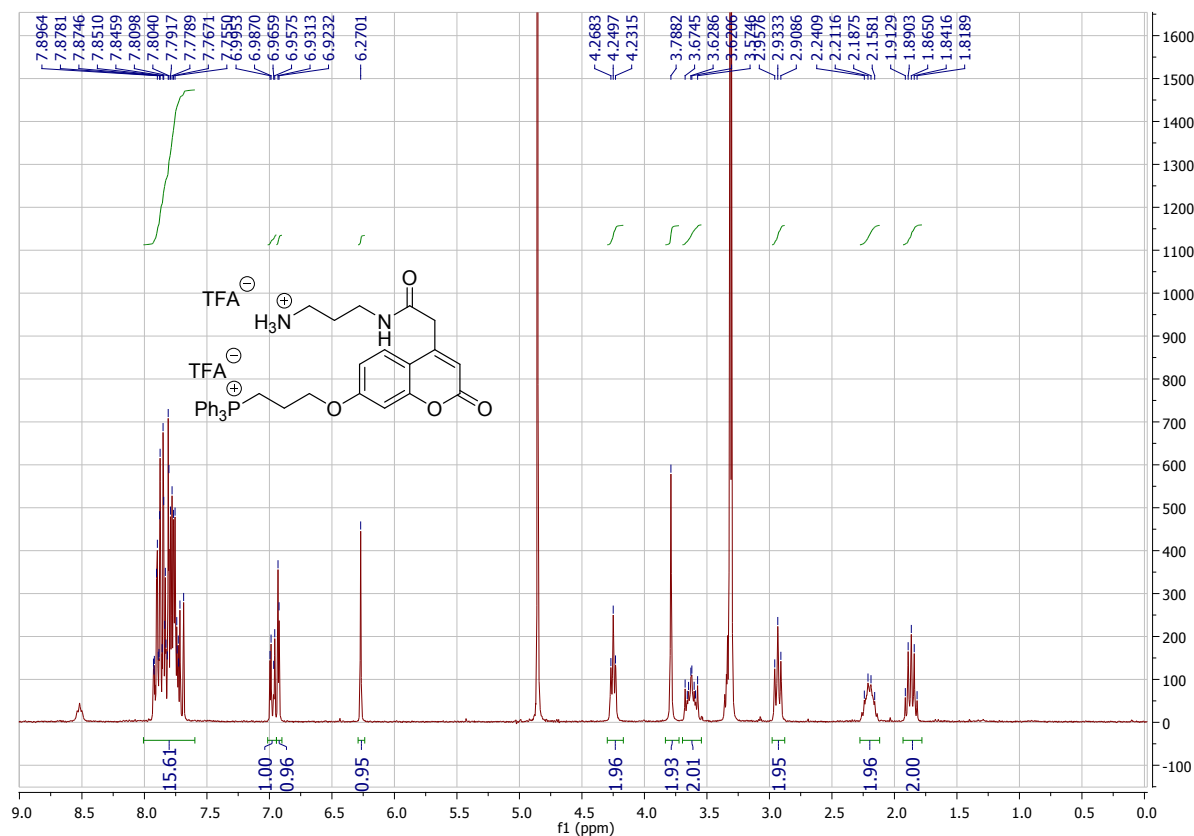

<sup>13</sup>C NMR spectrum in CD<sub>3</sub>OD (75 MHz)

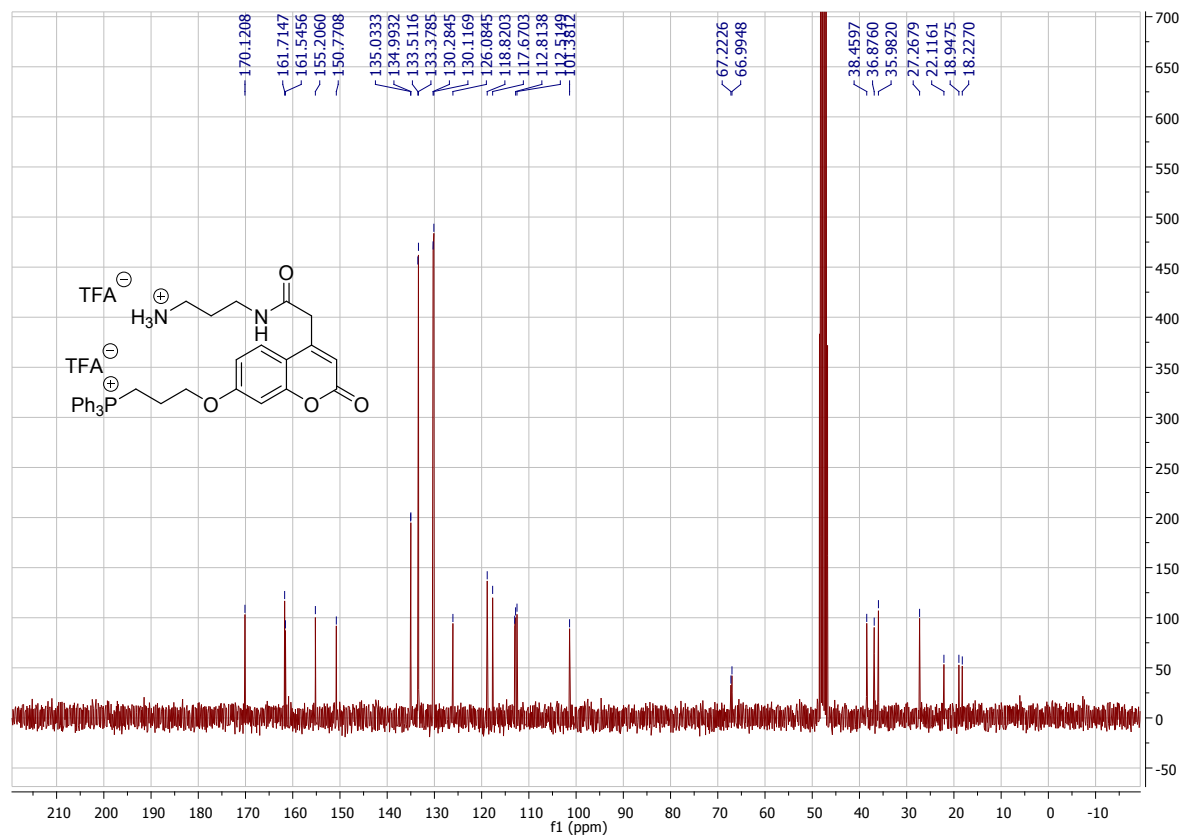

## 2,5-Dioxopyrrolidin-1-yl 2-iodoacetate

$^1\text{H}$  NMR spectrum in  $(\text{CD}_3)_2\text{SO}$  (300 MHz)

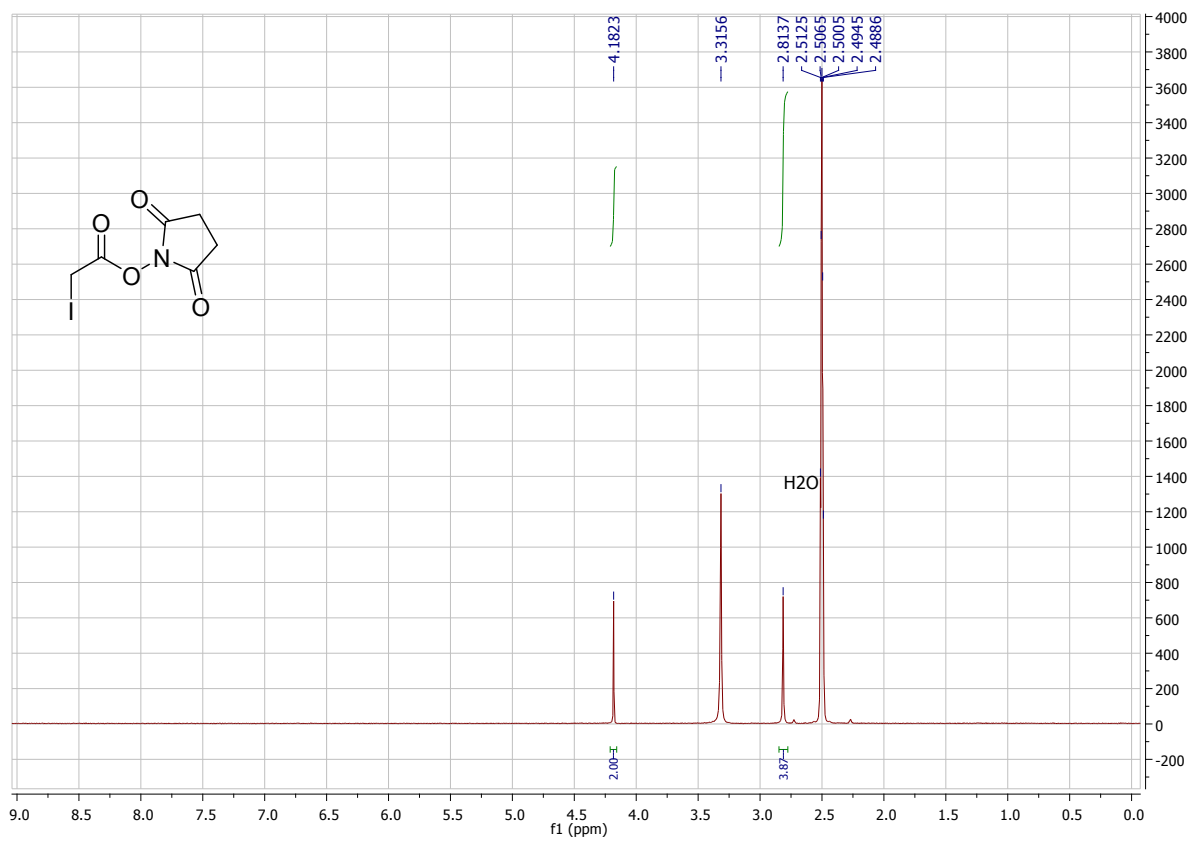

**(3-((4-(2-((3-(2-iodoacetamido)propyl)amino)-2-oxoethyl)-2-oxo-2H-chromen-7-yl)oxy)propyl)triphenylphosphonium 2,2,2-trifluoroacetate 14**

<sup>1</sup>H NMR spectrum in CD<sub>3</sub>OD (300 MHz)

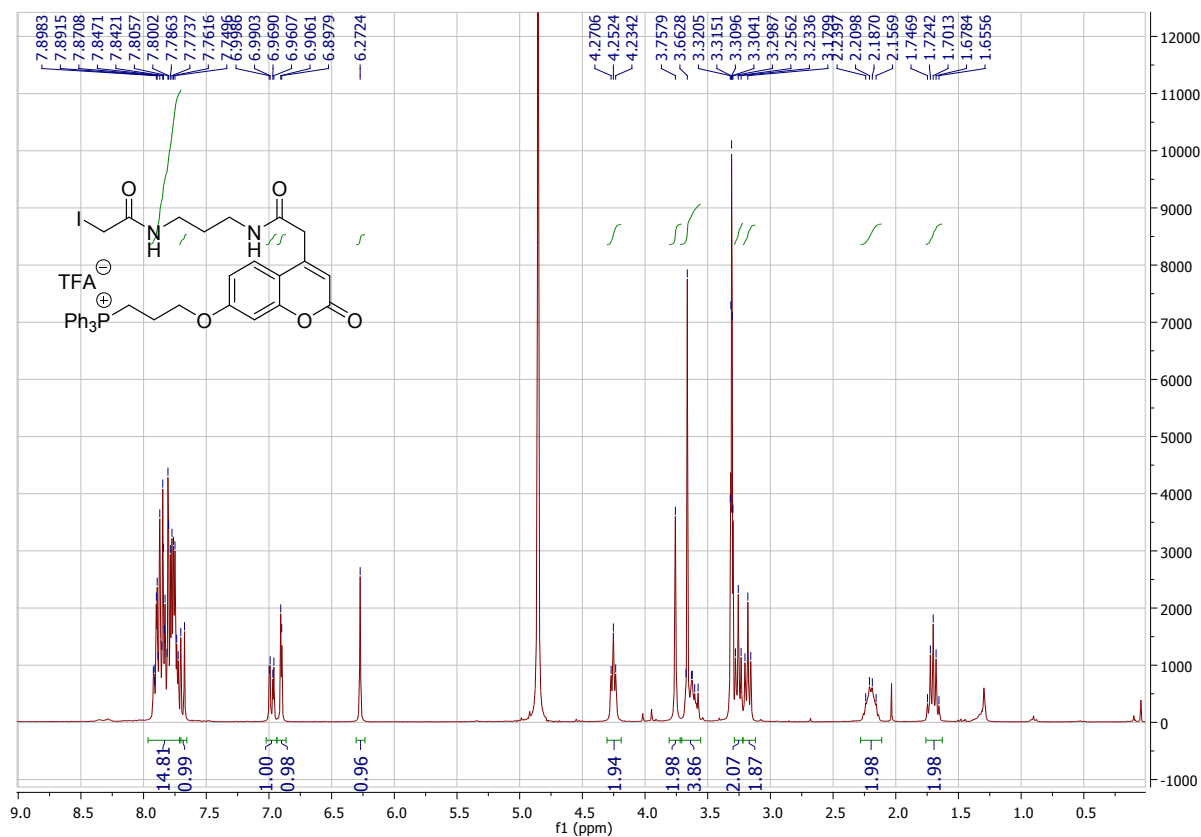

<sup>13</sup>C NMR spectrum in CD<sub>3</sub>OD (75 MHz)

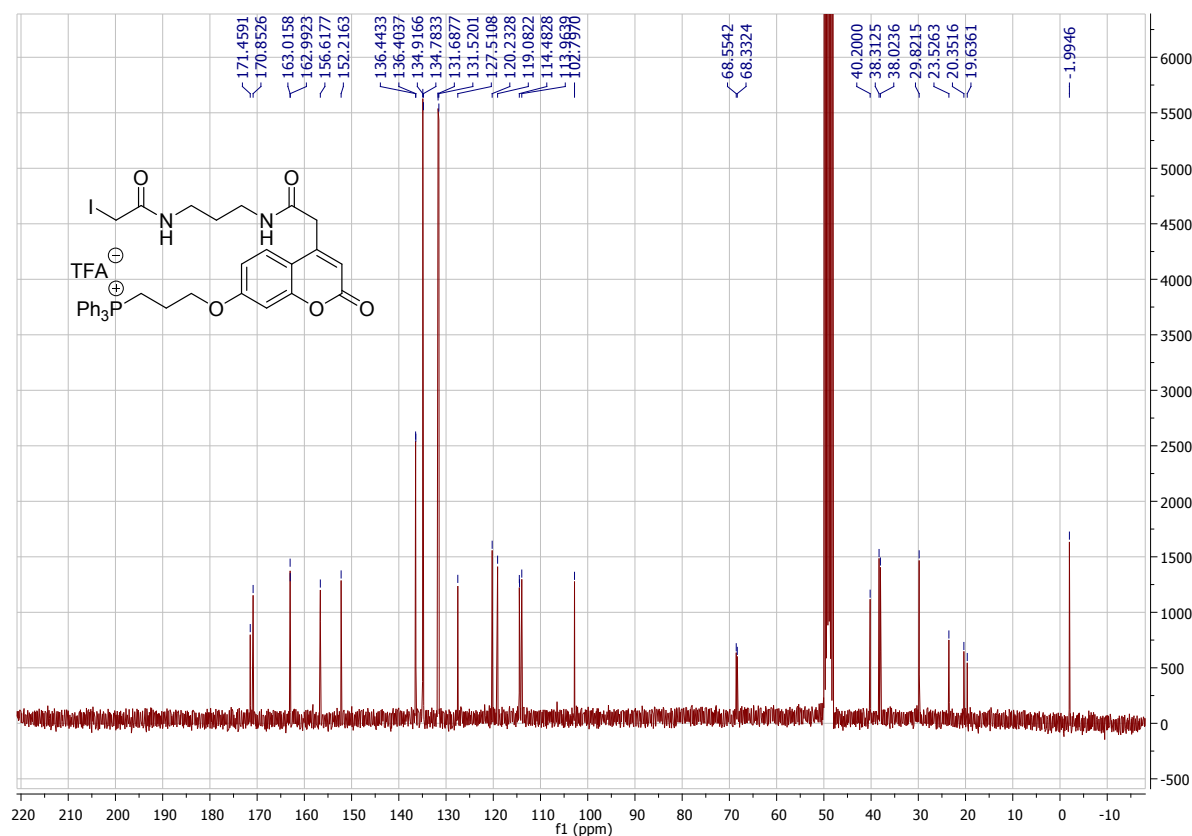



**(3-((4-(2-((3-(6-(5-ethoxy-2-methyloxazol-4-yl)hexanamido)propyl)amino)-2-oxoethyl)-2-oxo-2H-chromen-7-yl)oxy)propyl)triphenylphosphonium 2,2,2-trifluoroacetate 15**

<sup>1</sup>H NMR spectrum in CD<sub>3</sub>OD (300 MHz)

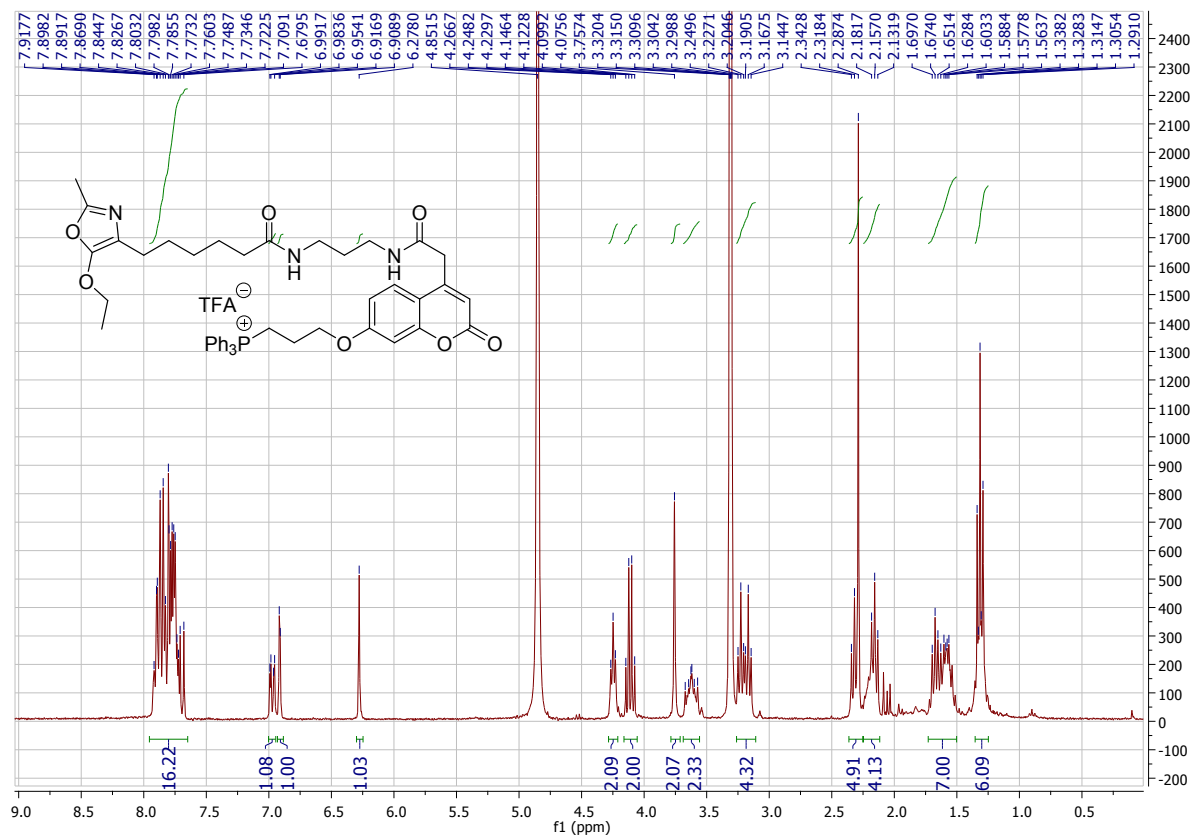

<sup>13</sup>C NMR spectrum in CD<sub>3</sub>OD (75 MHz)

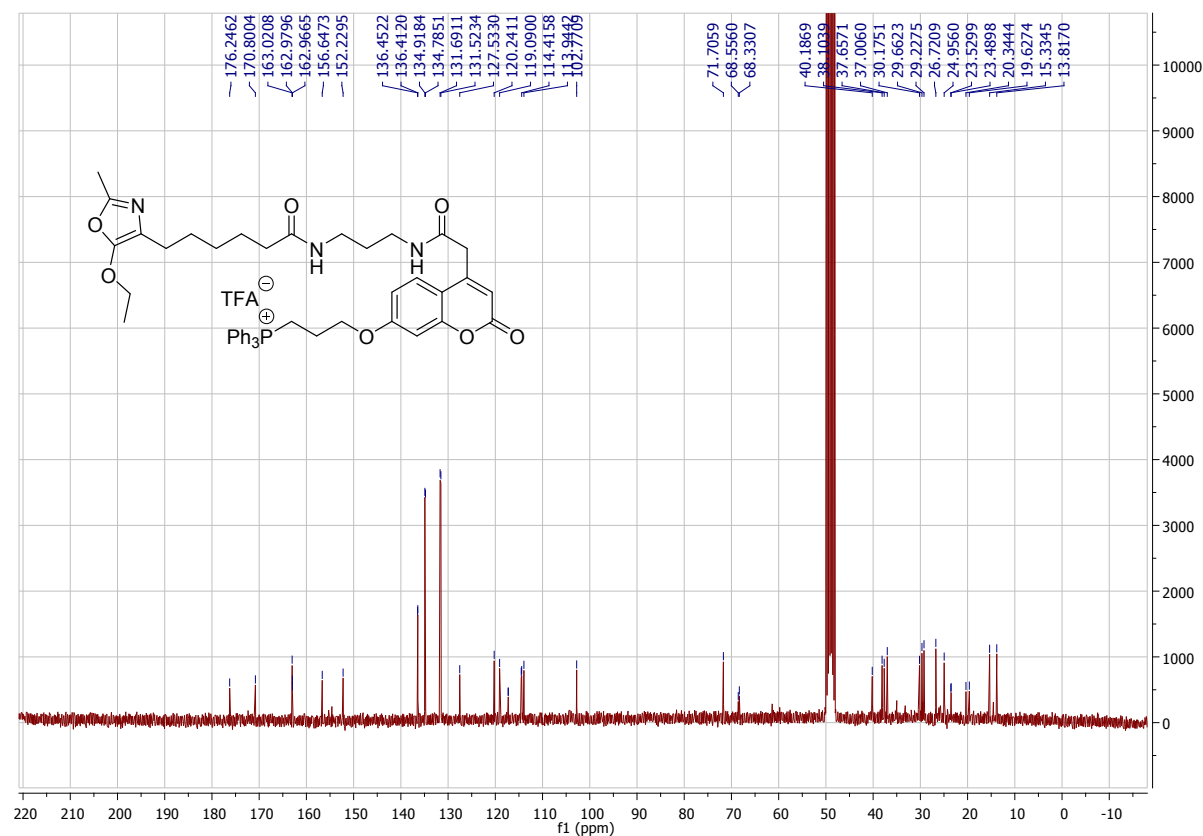

# 2,5-dioxopyrrolidin-1-yl 5-azidopentanoate

$^1\text{H}$  NMR spectrum in  $\text{CDCl}_3$  (300 MHz)

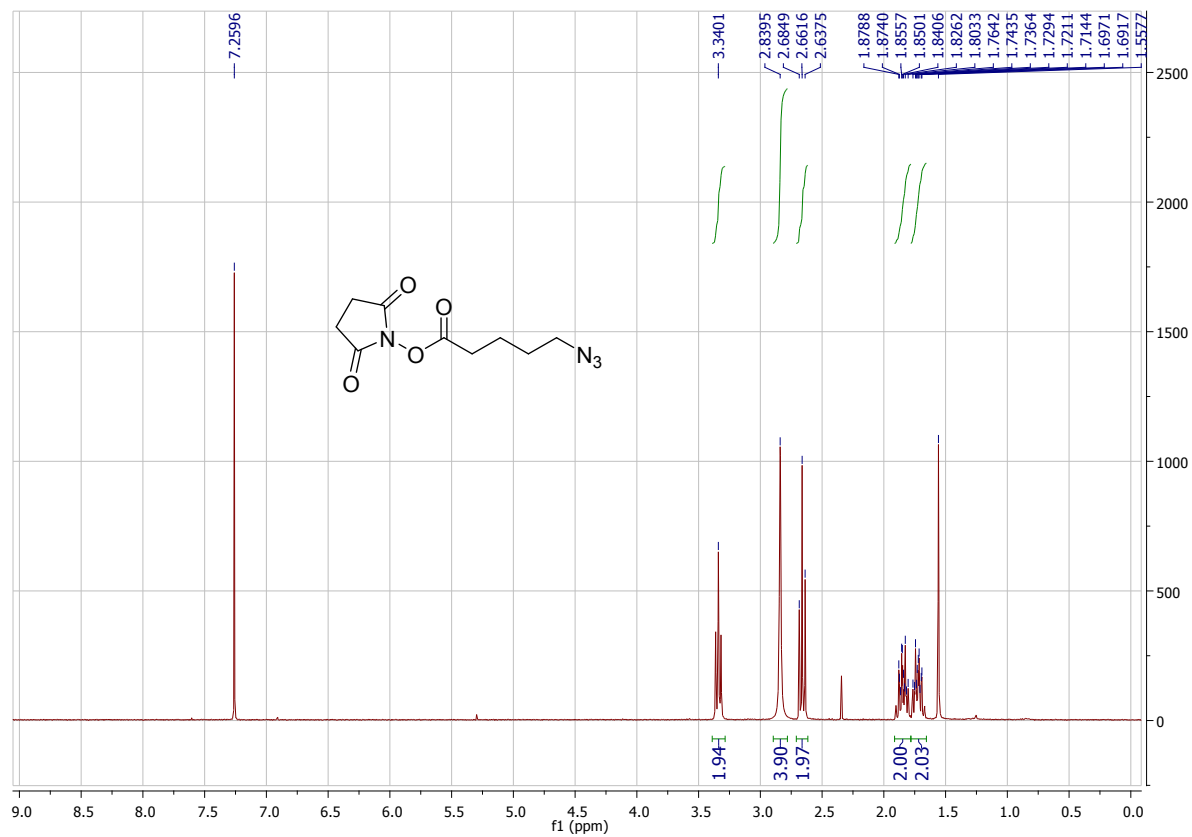

# (2,4-dinitrophenyl)glycine

<sup>1</sup>H NMR spectrum in CD<sub>3</sub>OD (300 MHz)

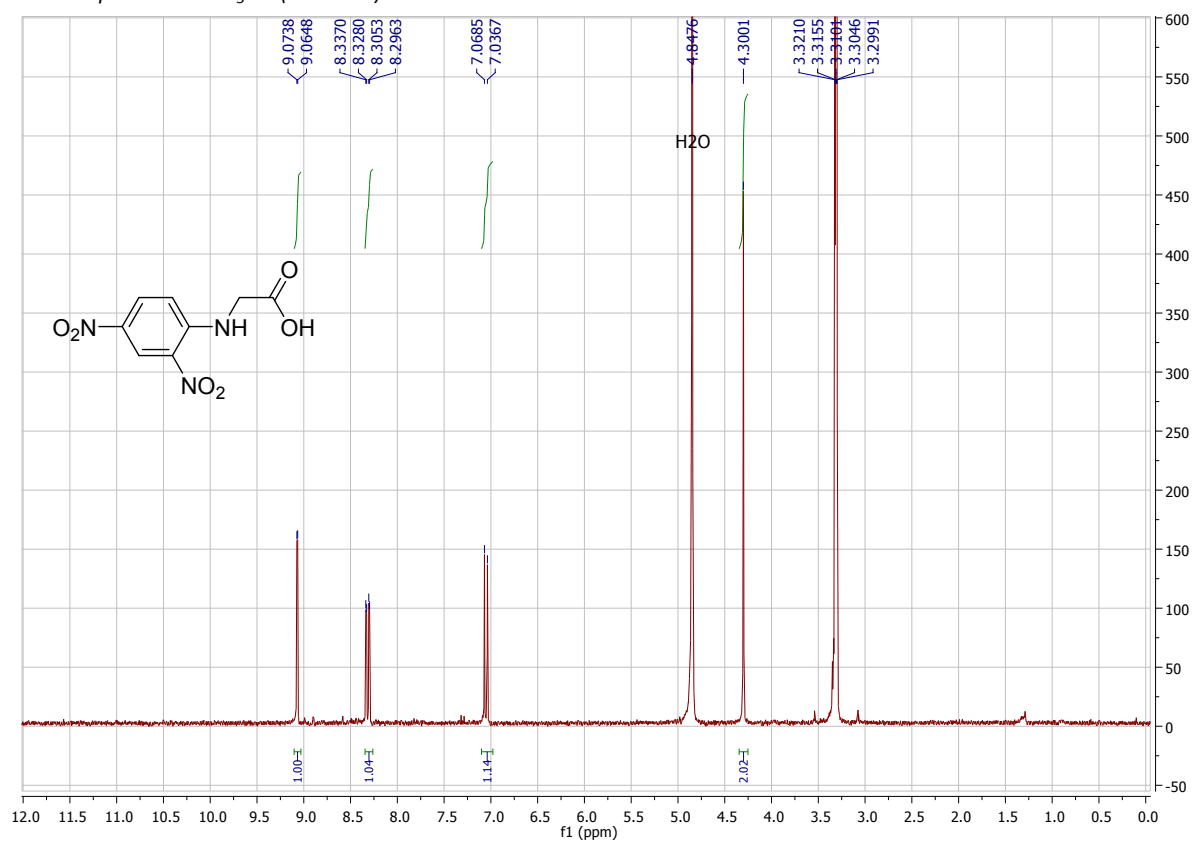

# (3-ammoniopropyl)triphenylphosphonium bromide

$^1\text{H}$  NMR spectrum in  $(\text{CD}_3)_2\text{SO}$  (300 MHz)

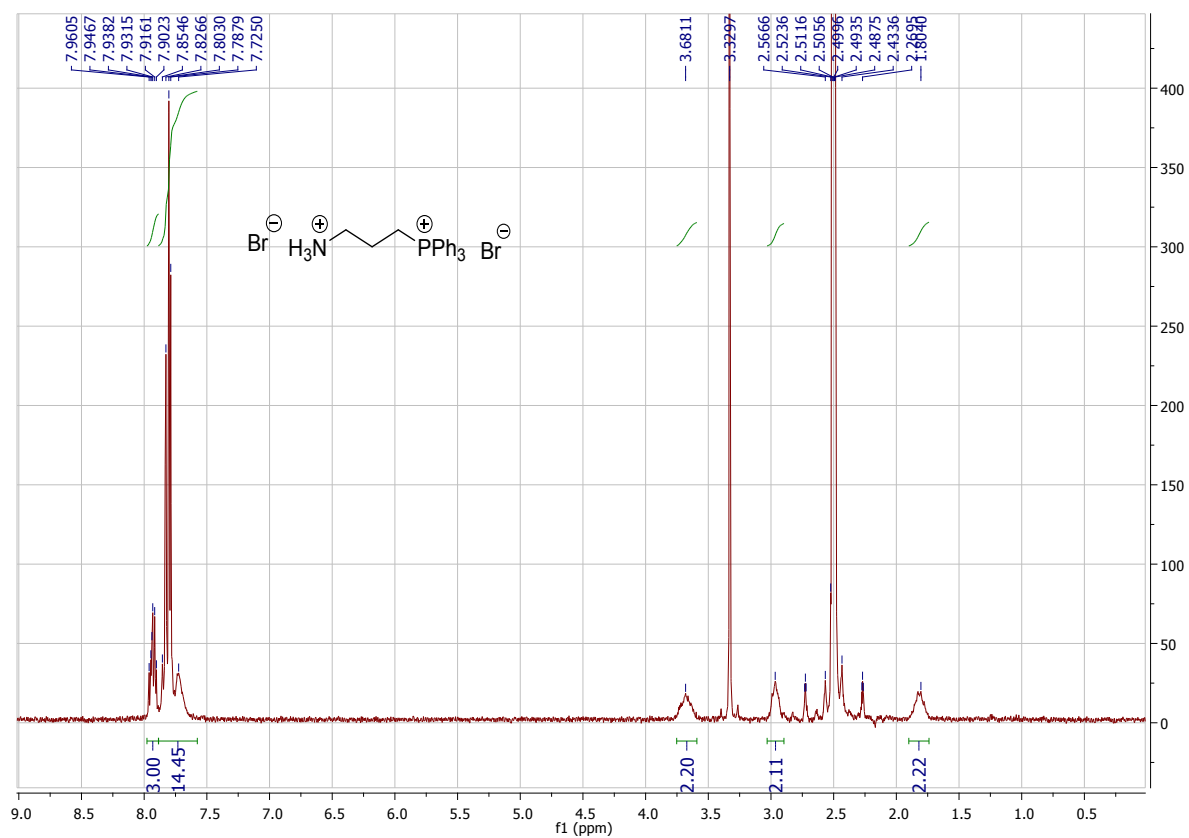

### 4-Chloro-(N-(2-propyn-1-yl))-1,8-naphthalimide 27

<sup>1</sup>H NMR spectrum in CDCl<sub>3</sub> (300 MHz)

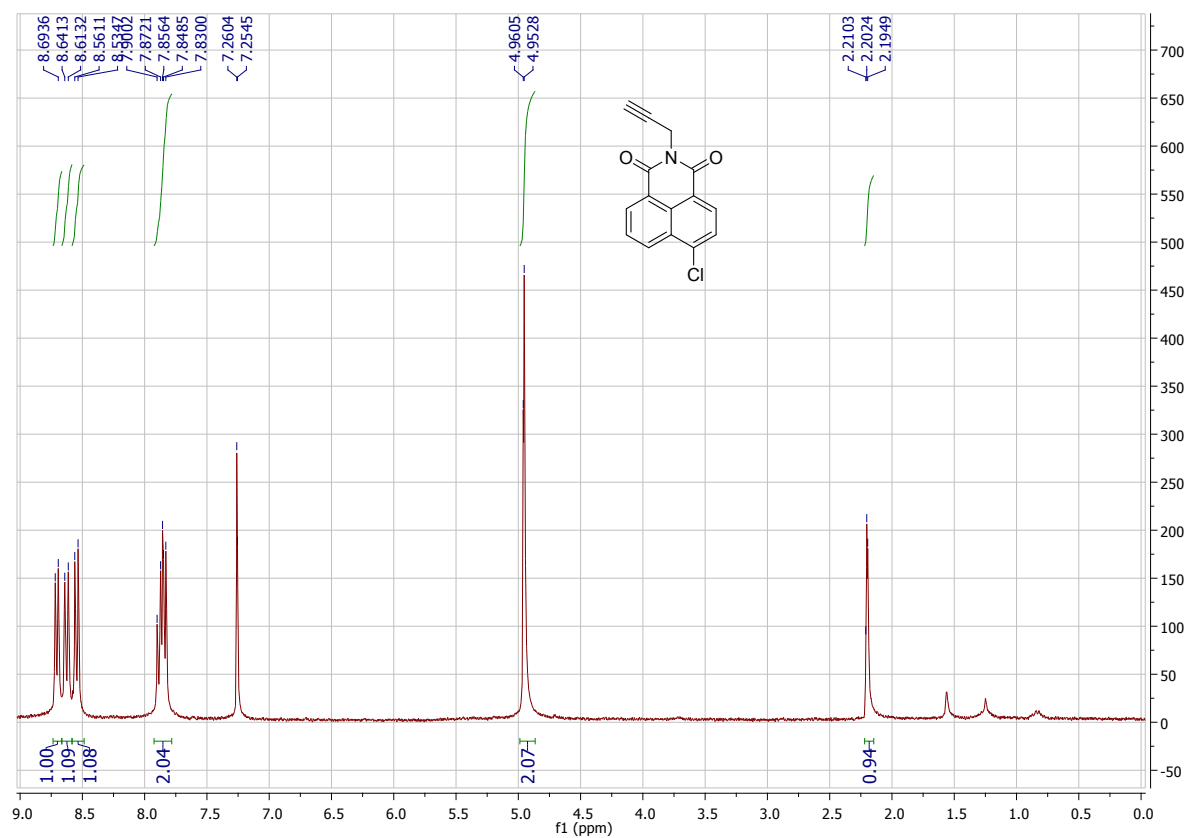

### 2-(prop-2-yn-1-yl)-6-(propylamino)-1H-benzo[de]isoquinoline-1,3(2H)-dione 28

<sup>1</sup>H NMR spectrum in CDCl<sub>3</sub> (300 MHz)

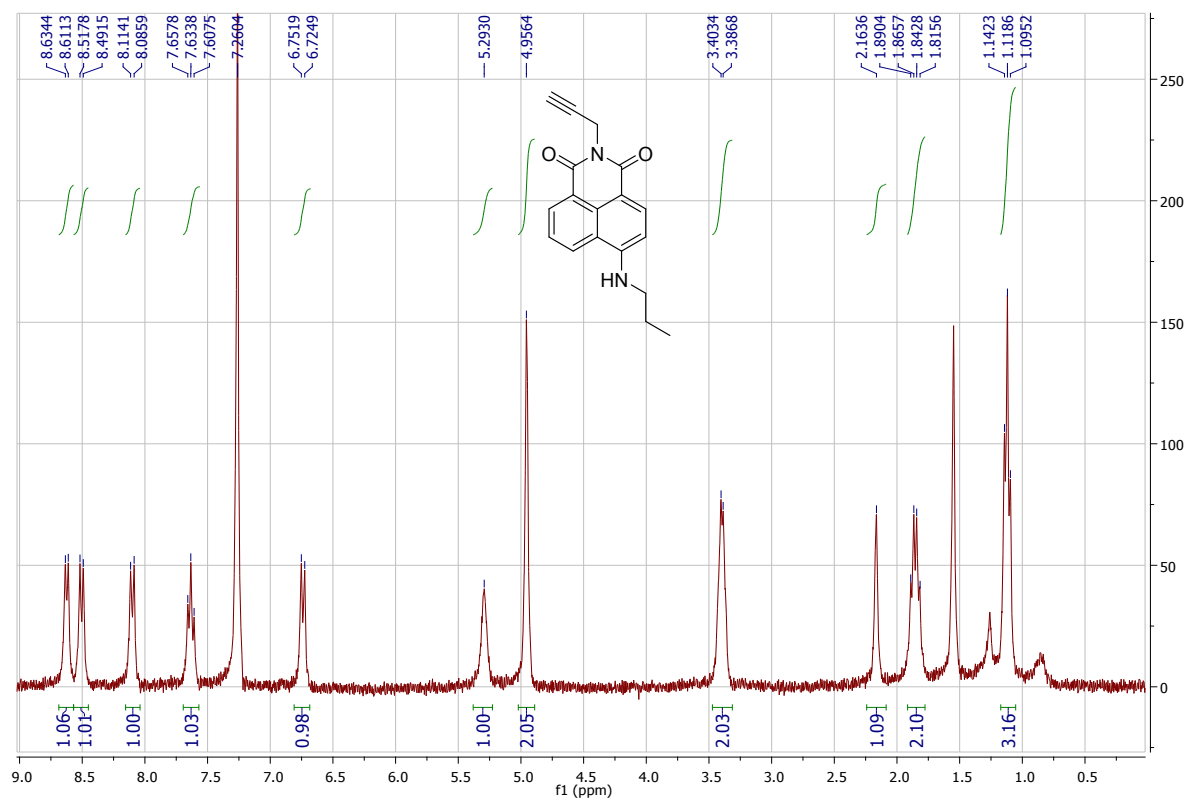

<sup>13</sup>C NMR spectrum in CDCl<sub>3</sub> (75 MHz)

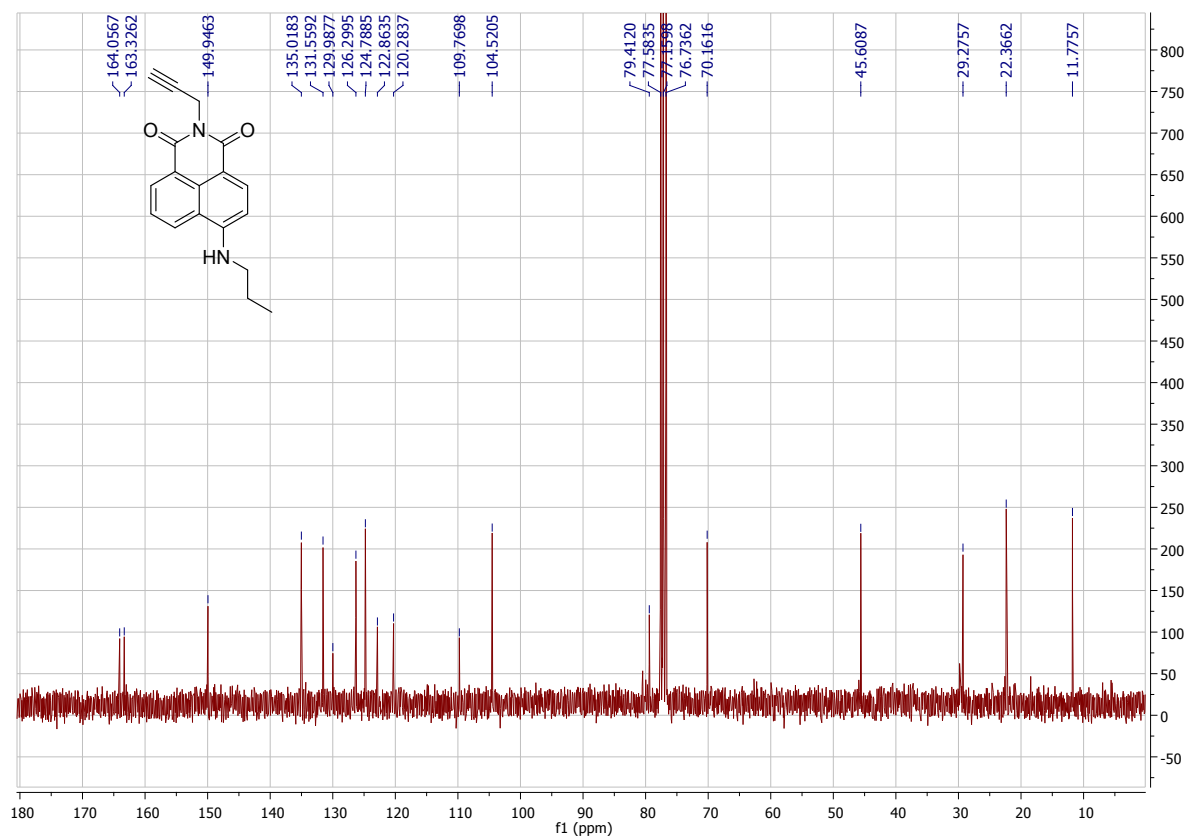

**(3-((1,3-dioxo-2-(prop-2-yn-1-yl)-2,3-dihydro-1H-benzo[de]isoquinolin-6-yl)amino)propyl)triphenylphosphonium bromide 29**

<sup>1</sup>H NMR spectrum in CDCl<sub>3</sub> (300 MHz)

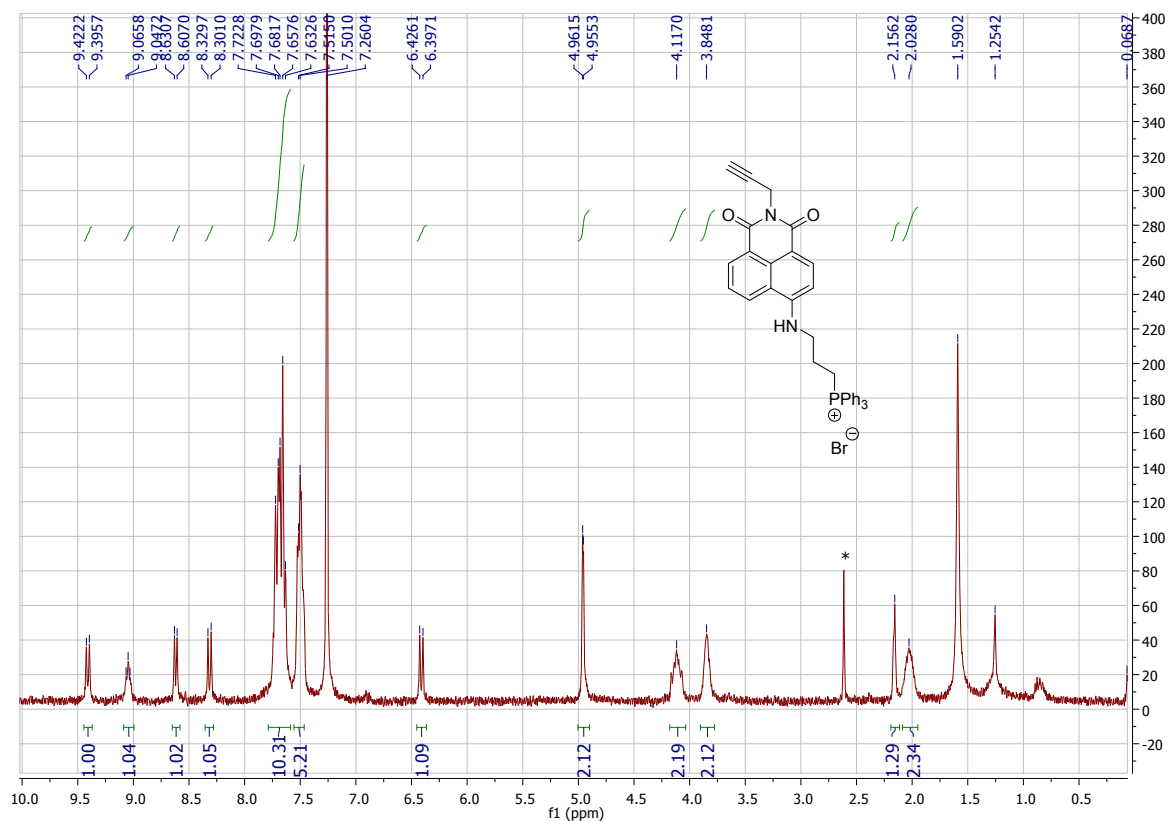

<sup>13</sup>C NMR spectrum in CDCl<sub>3</sub> (75 MHz)

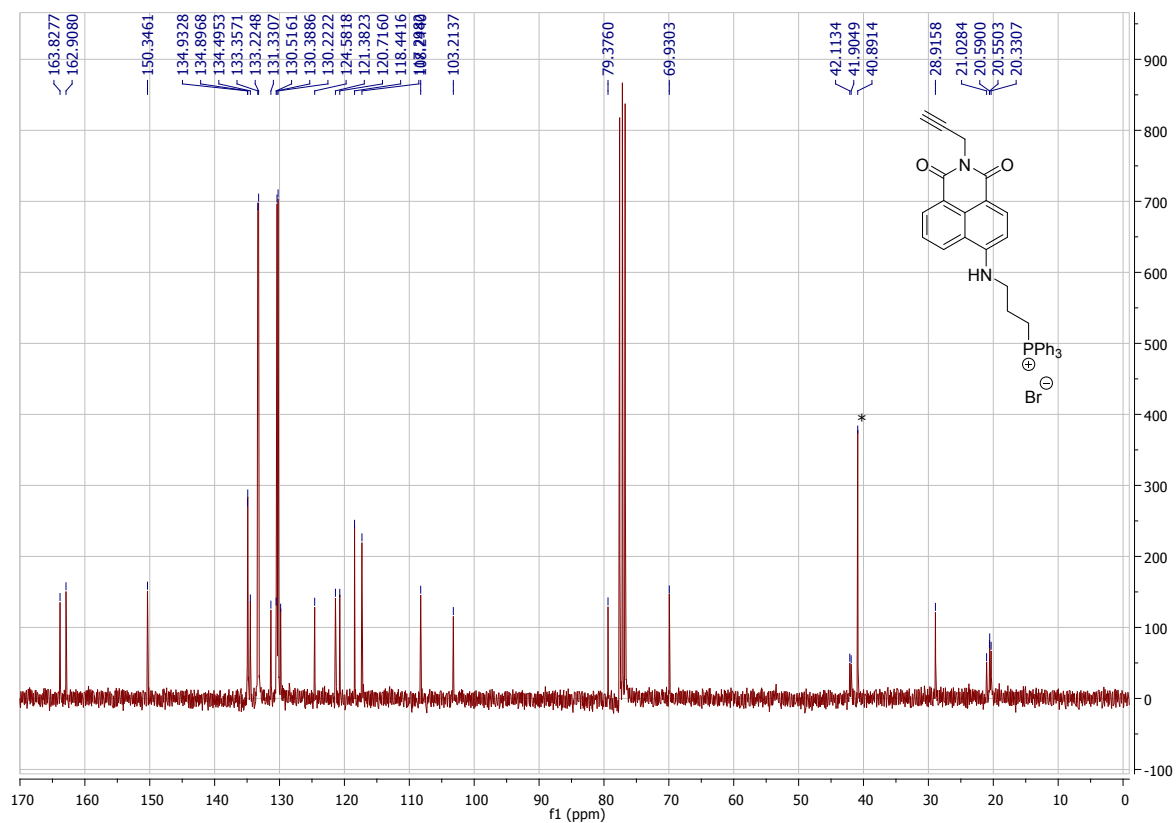

\* DMSO residual peak

## 2) RP-HPLC elution profiles

The following analytical RP-HPLC were performed using the System QC: (Thermo Hypersyl GOLD C18 column, 5  $\mu$ m, 2.1 x 100 mm) with ACN and 0.1% aq. TFA as eluents [0% ACN (5 min) followed by linear gradient from 0% to 100% (40 min) of ACN] at a flow rate of 0.25 mL/min.

### Methyl 2-(7-methoxy-2-oxo-2H-chromen-4-yl)acetate 1

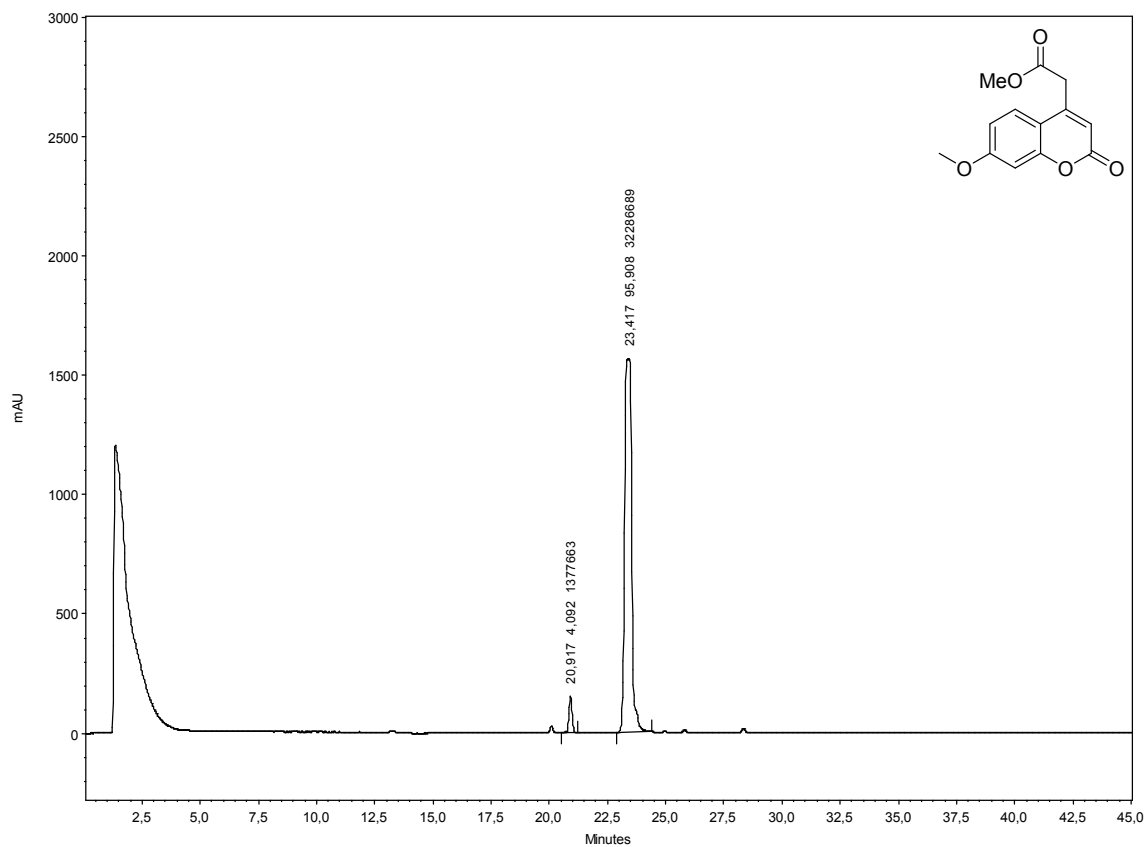



### 2-(7-Methoxy-2-oxo-2H-chromen-4-yl)acetic acid 2

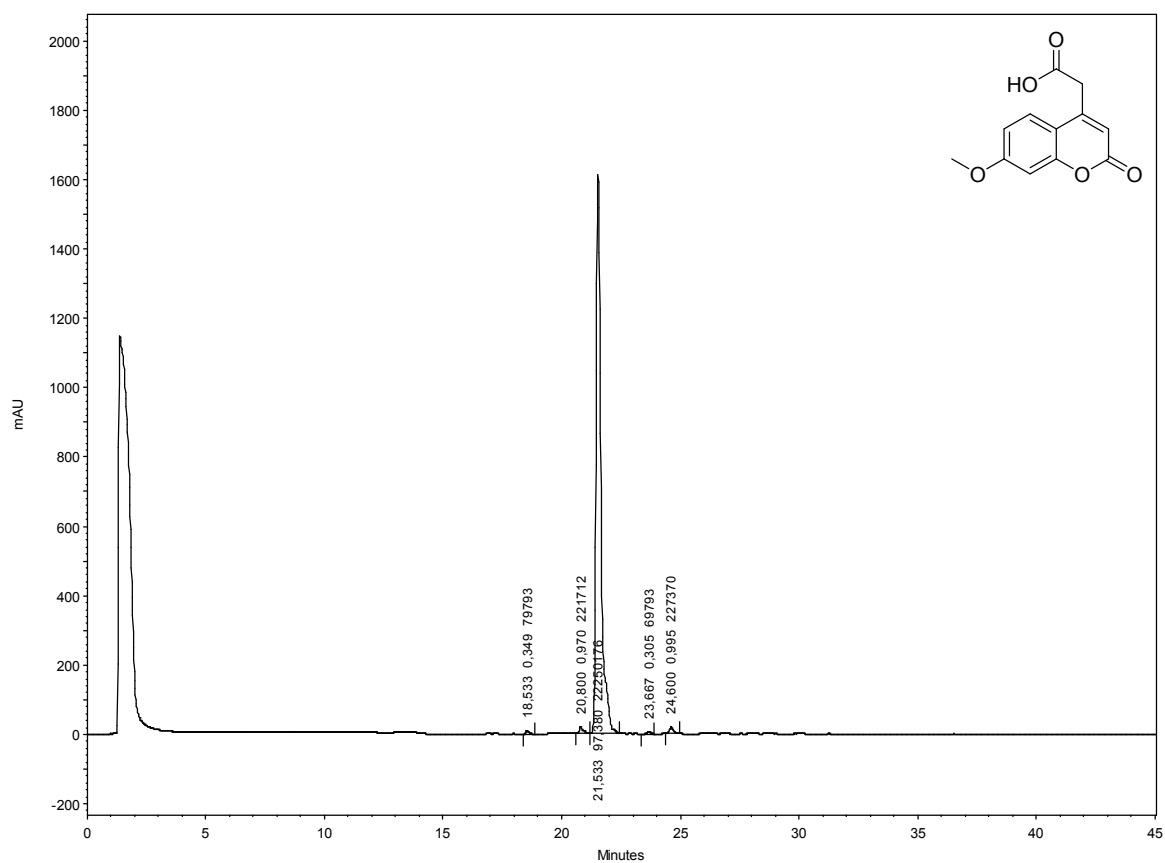

### (3-((4-(2-methoxy-2-oxoethyl)-2-oxo-2H-chromen-7yl)oxy)-propyl)triphenylphosphonium bromide 5

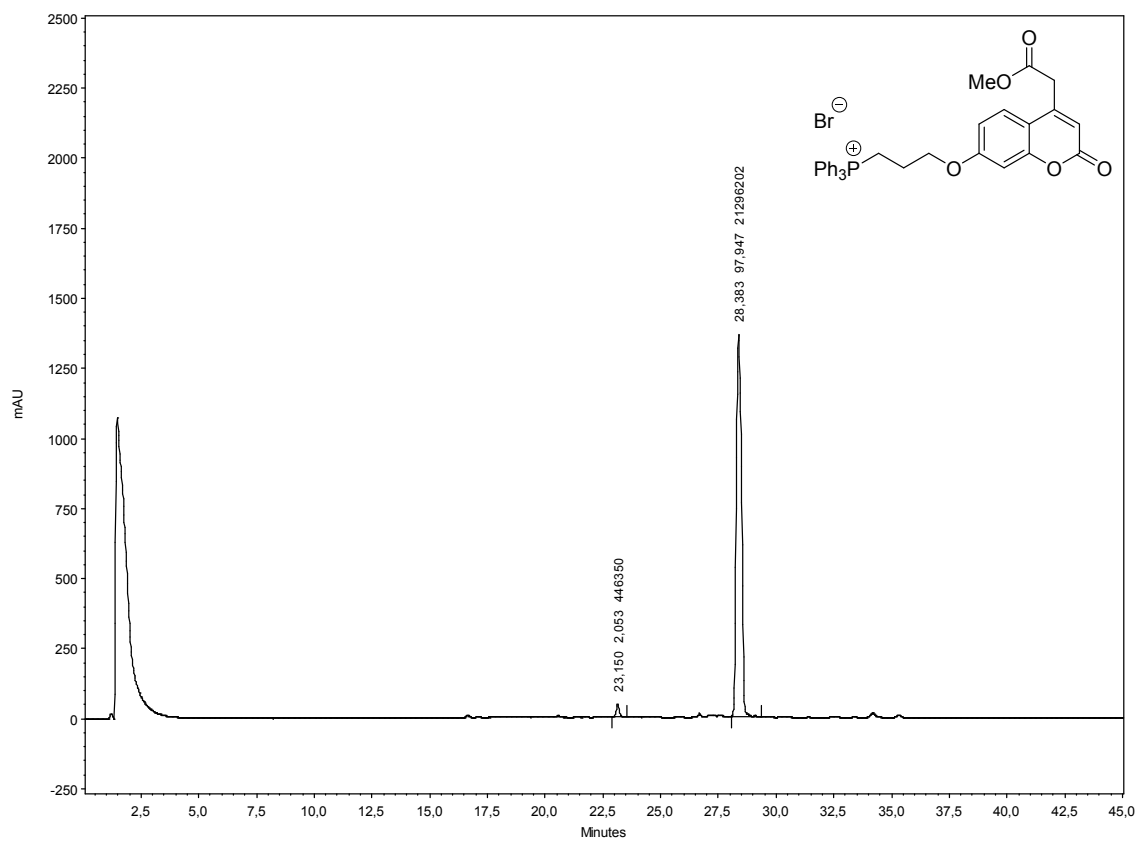

**3-((4-(2-methoxy-2-oxoethyl)-2-oxo-2H-chromen-7-yl)oxy)-N,N,N-trimethylpropan-1-aminium bromide 6**

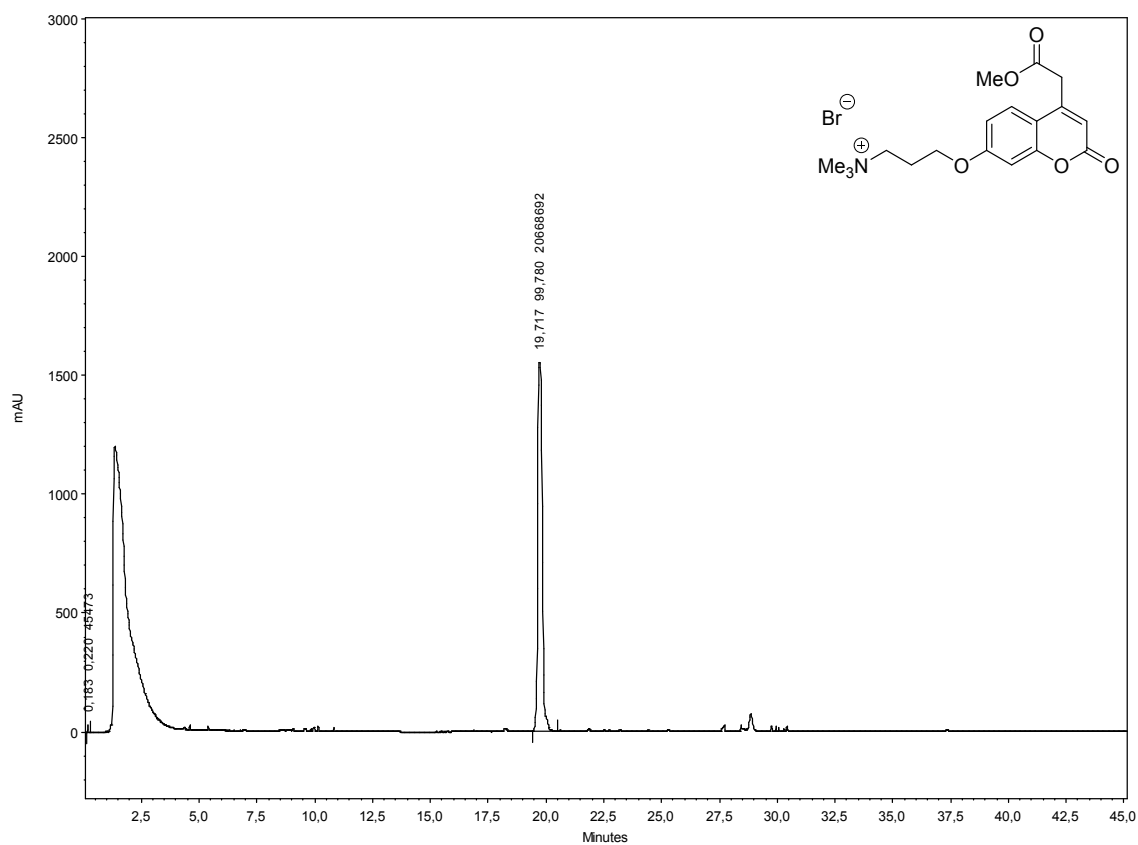

**(3-((4-(carboxymethyl)-2-oxo-2H-chromen-7-yl)oxy)propyl)-triphenylphosphonium bromide 7**

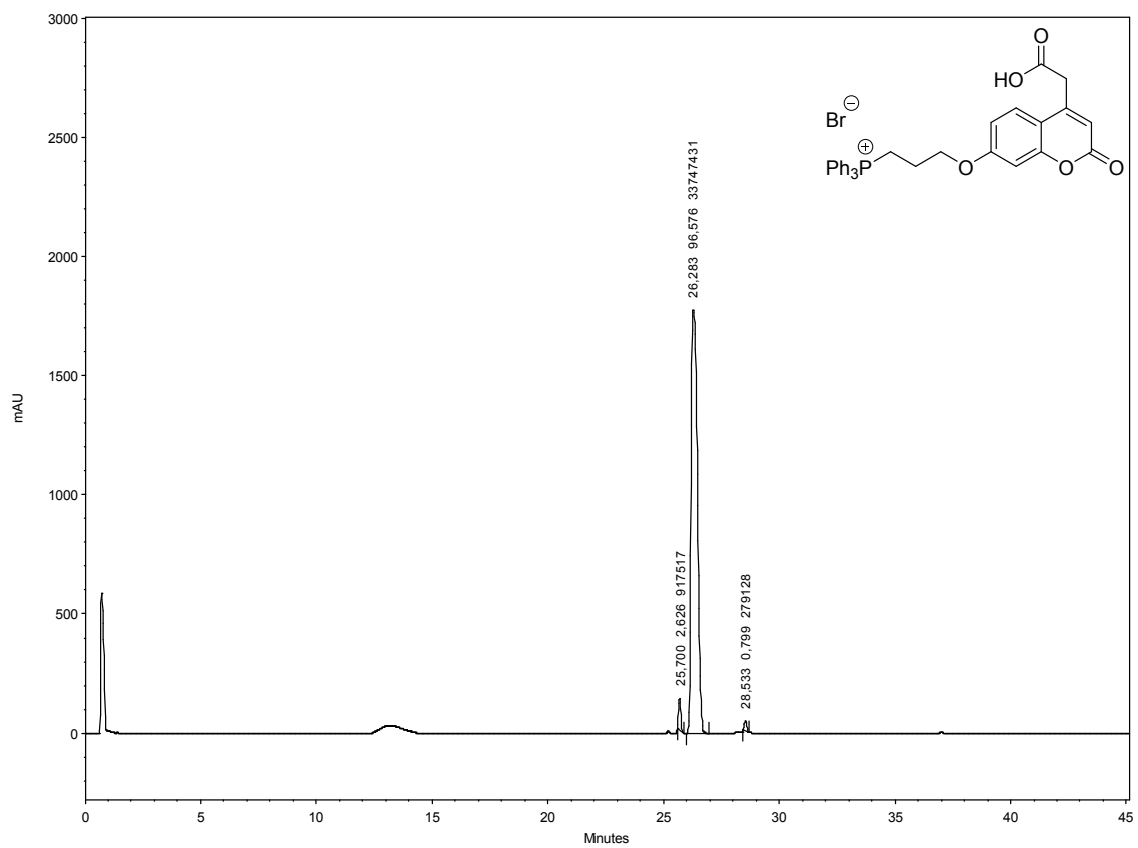

**(3-((2-oxo-4-(2-oxo-2-(prop-2-yn-1-ylamino)ethyl)-2H-chromen-7-yl)oxy)propyl)triphenyl-phosphonium bromide 10**

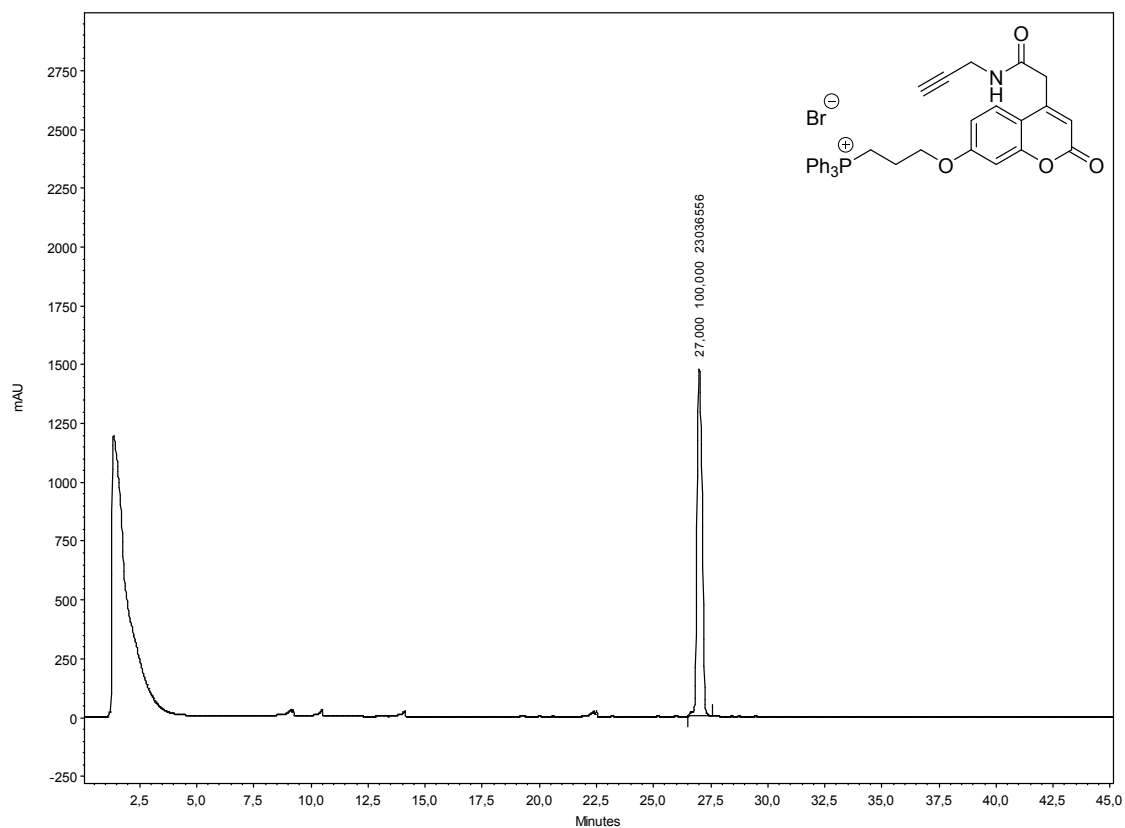

**(3-((4-(2-((3-aminopropyl)amino)-2-oxoethyl)-2-oxo-2H-chromen-7-yl)oxy)propyl)triphenyl-phosphonium bromide 13**

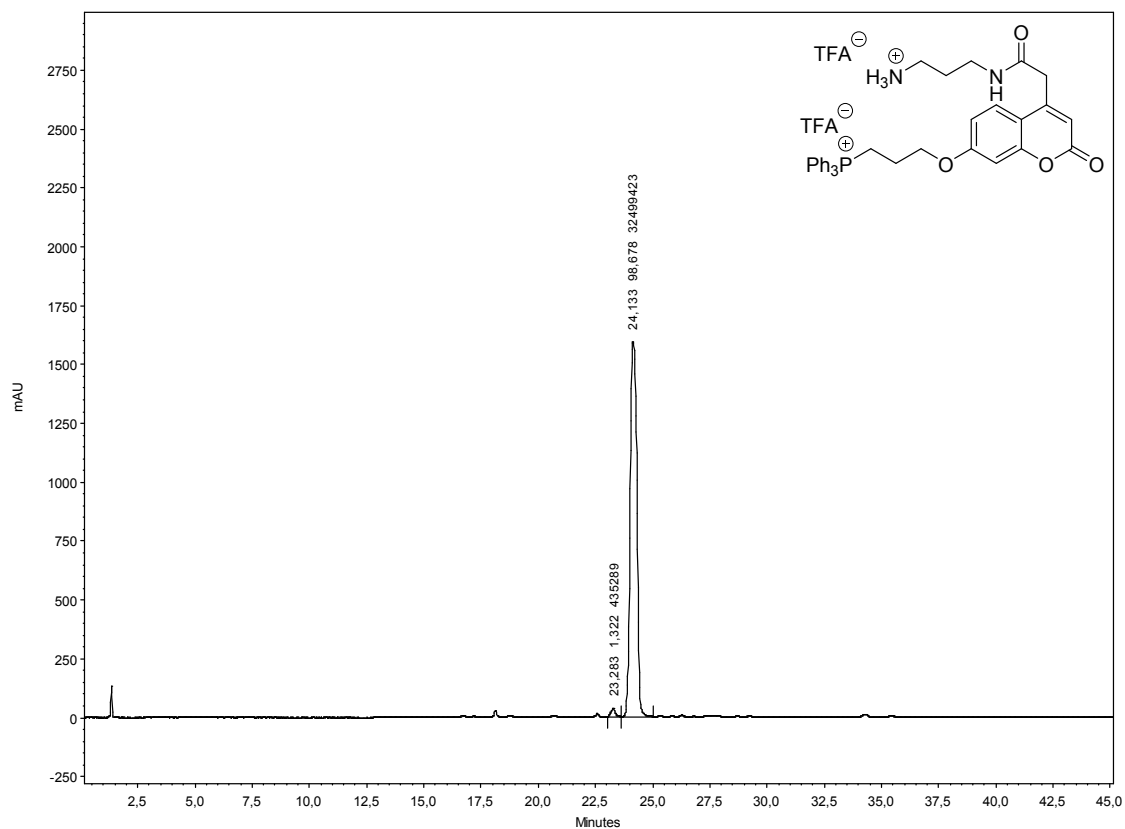

**(3-((4-(2-((3-(2-iodoacetamido)propyl)amino)-2-oxoethyl)-2-oxo-2H-chromen-7-yl)oxy)propyl)triphenylphosphonium 2,2,2-trifluoroacetate 14**

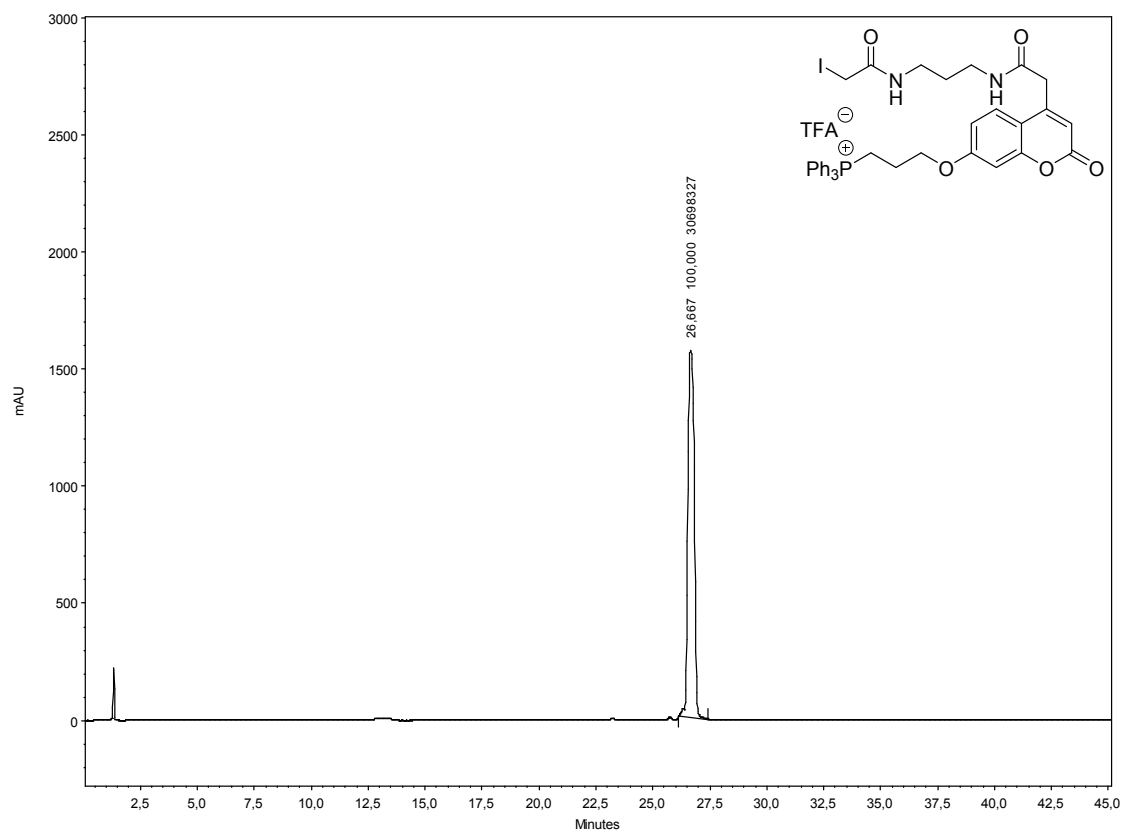

**(3-((4-(2-((3-(6-(5-ethoxy-2-methyloxazol-4-yl)hexanamido)propyl)amino)-2-oxoethyl)-2-oxo-2H-chromen-7-yl)oxy)propyl)triphenylphosphonium 2,2,2-trifluoroacetate 15**

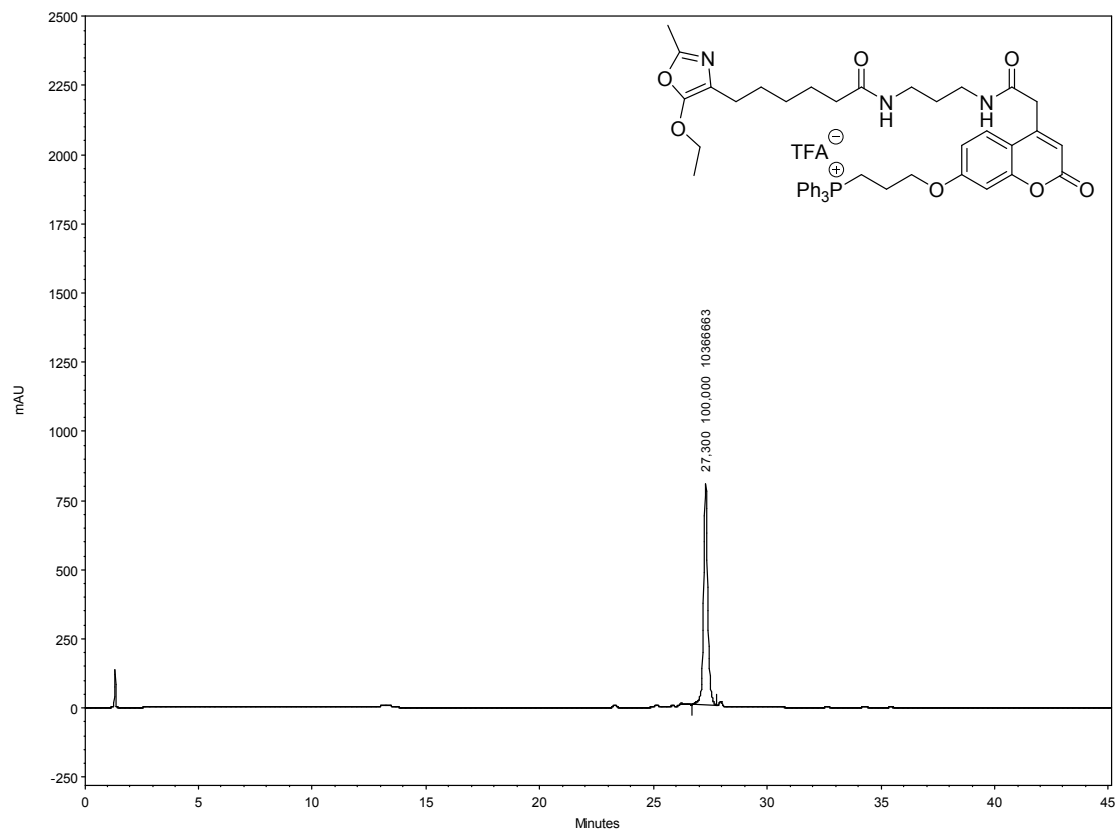

### Phosphonium-tagged tetrapeptide 17

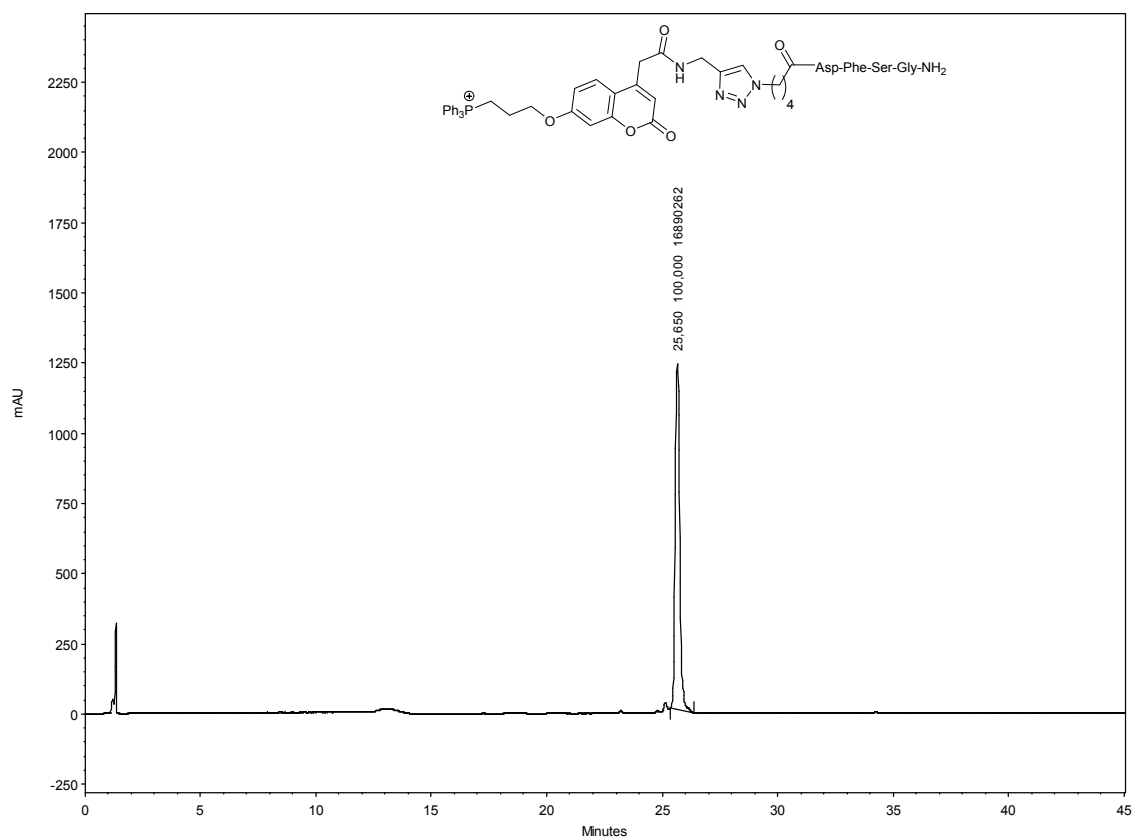

### (MOCac)-Ser-Glu-Val-Asn-Leu-Asp-Ala-Glu-Phe-Lys-(DNPA)-Arg-Arg 19

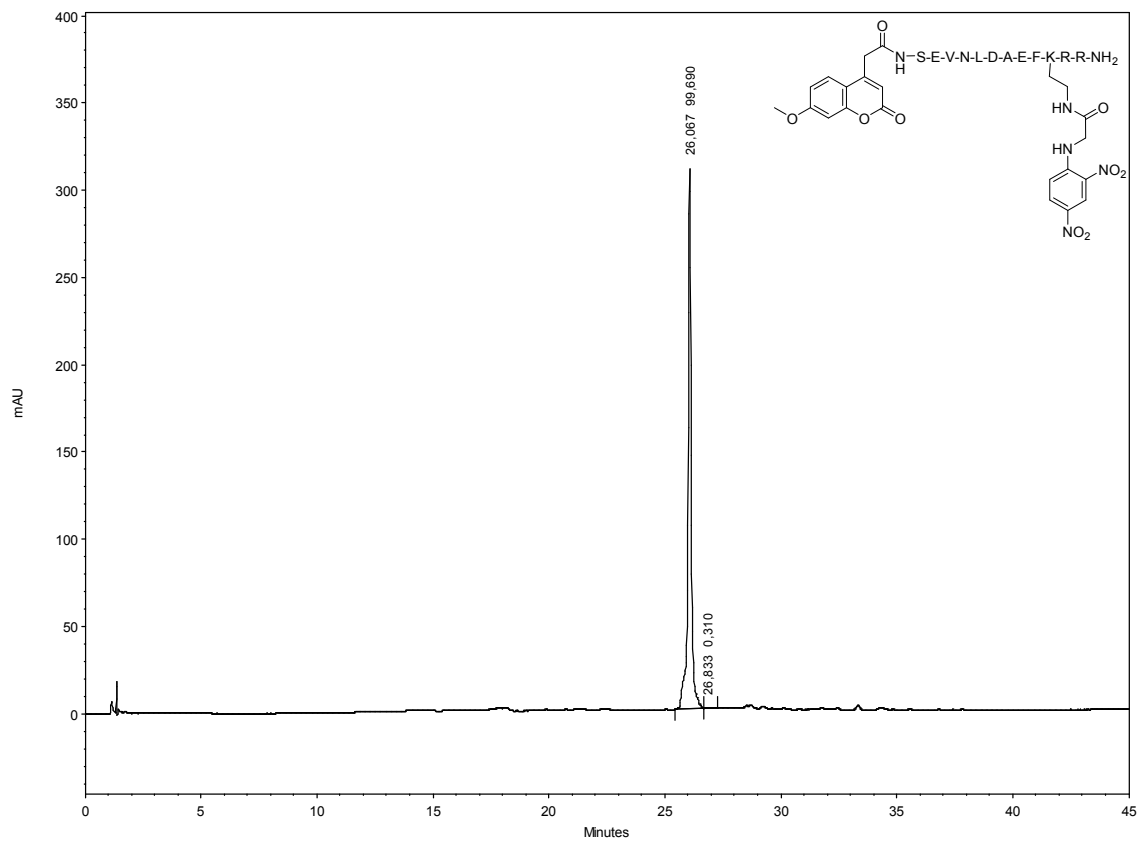

**(PPh<sub>3</sub>C)-Ser-Glu-Val-Asn-Leu-Asp-Ala-Glu-Phe-Lys-(DNPA)-Arg-Arg 20**

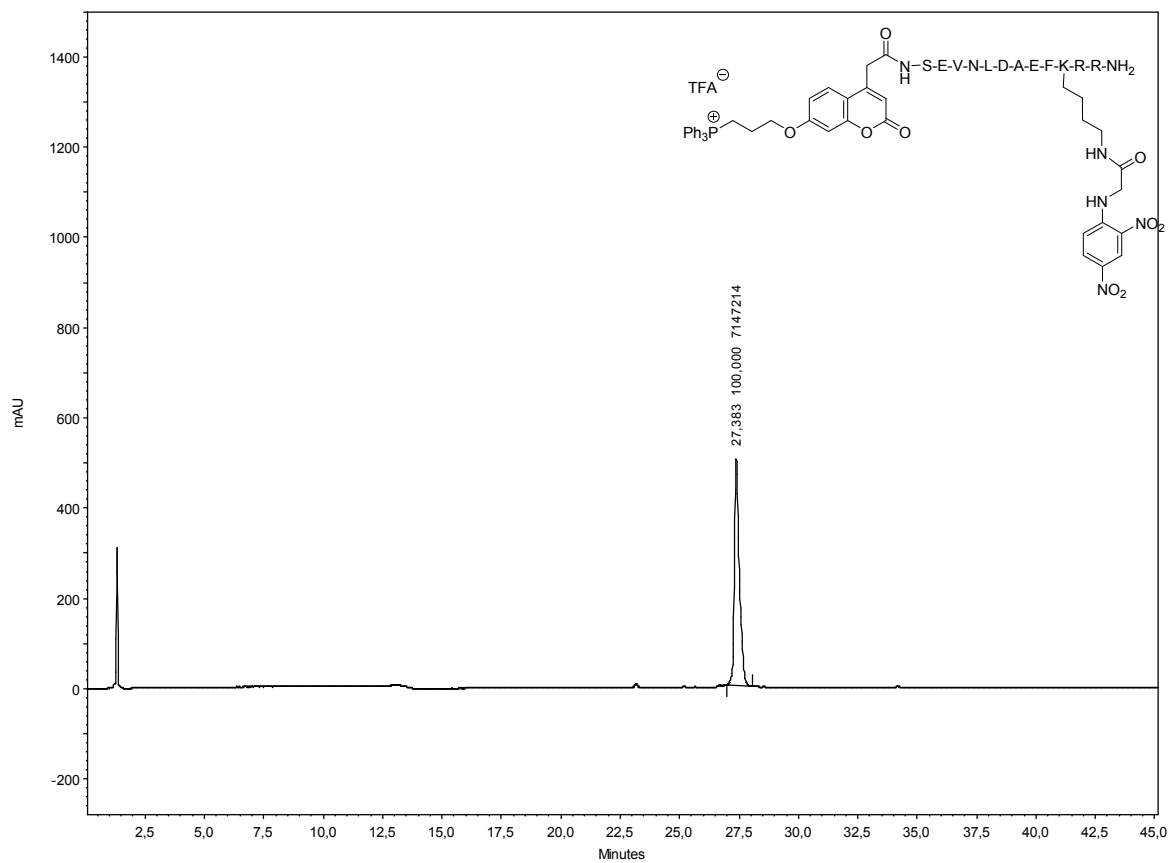

RP-HPLC analysis of a  $2.17 \times 10^2 \mu\text{M}$  solution of coumarins 1 - 5 - 6 in a 1:1:1 molar ratio.

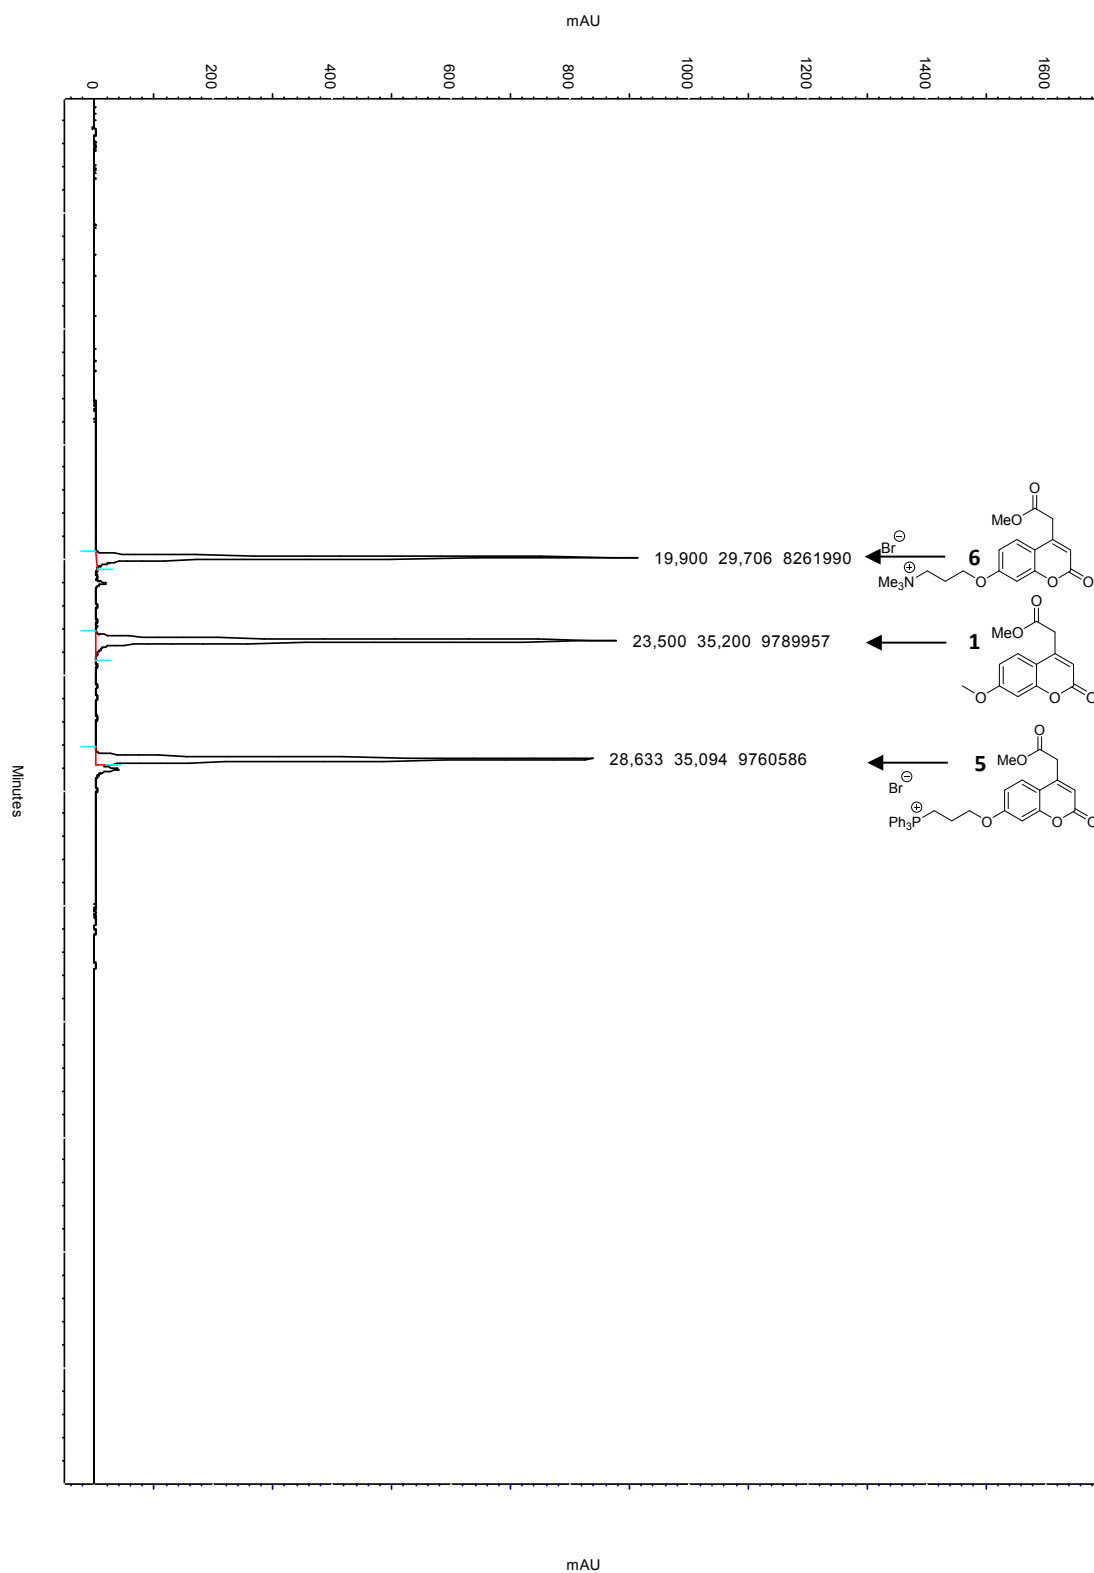

**2-(prop-2-yn-1-yl)-6-(propylamino)-1H-benzo[de]isoquinoline-1,3(2H)-dione 28**

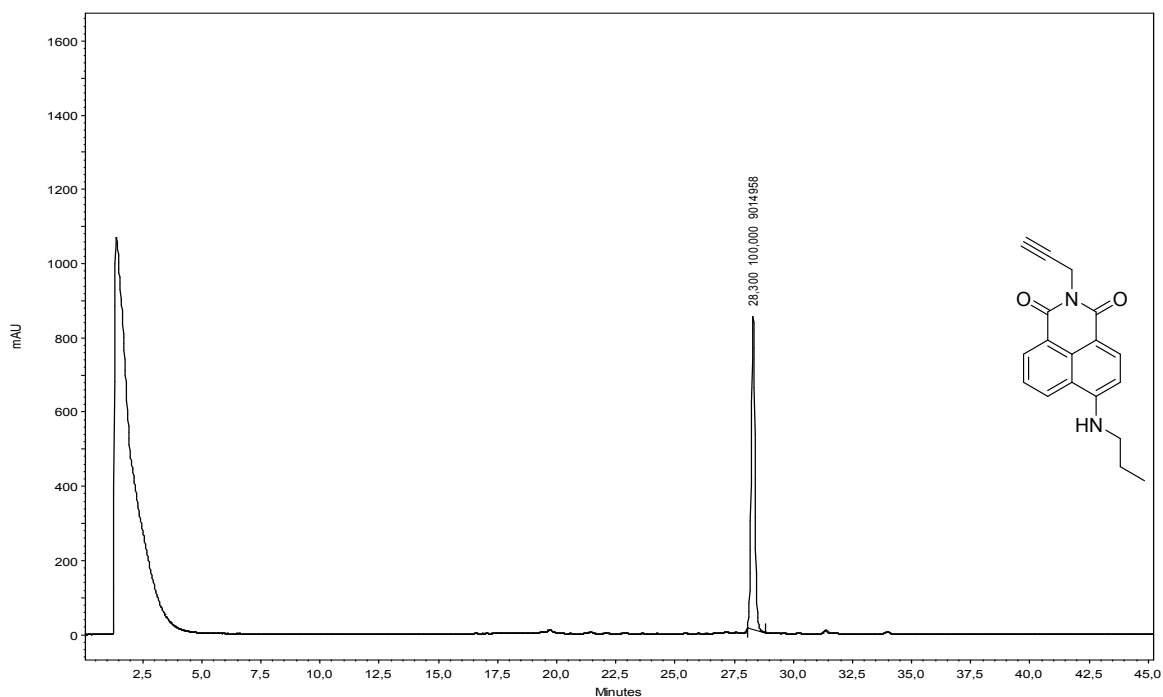

**(3-((1,3-dioxo-2-(prop-2-yn-1-yl)-2,3-dihydro-1H-benzo[de]isoquinolin-6-yl)amino)propyl)triphenylphosphonium bromide 29**

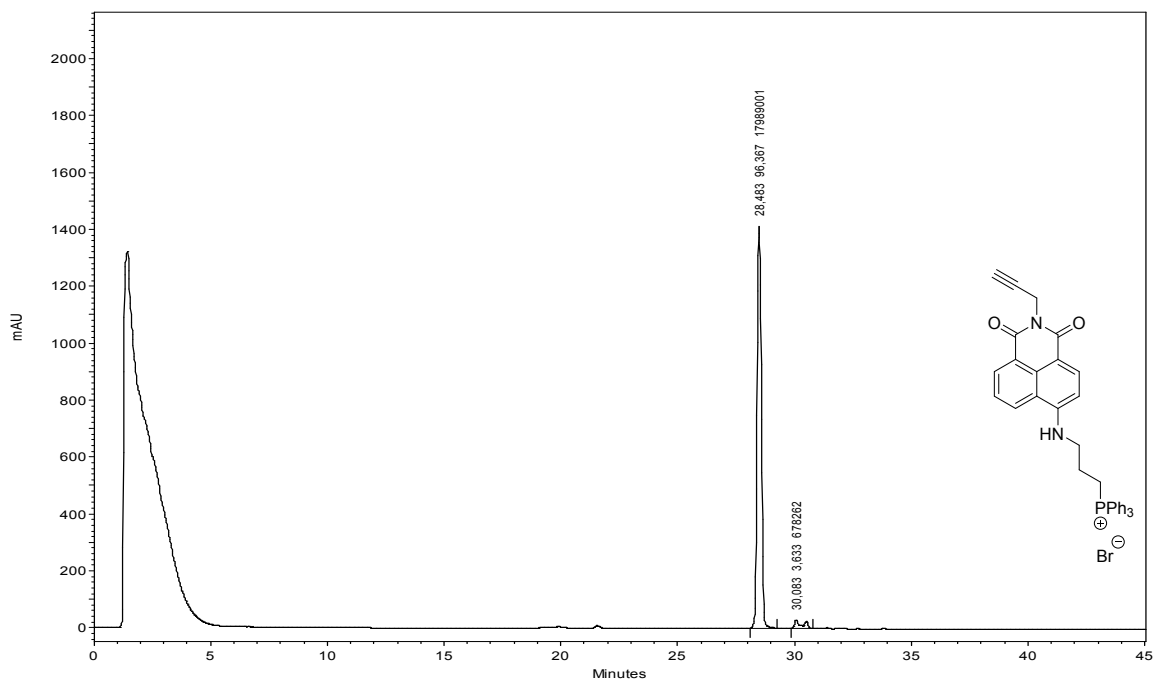



### 3) Spectroscopic data

#### 1) Absorption, excitation, emission spectra of coumarin derivatives

##### Methyl 2-(7-methoxy-2-oxo-2H-chromen-4-yl)acetate 1

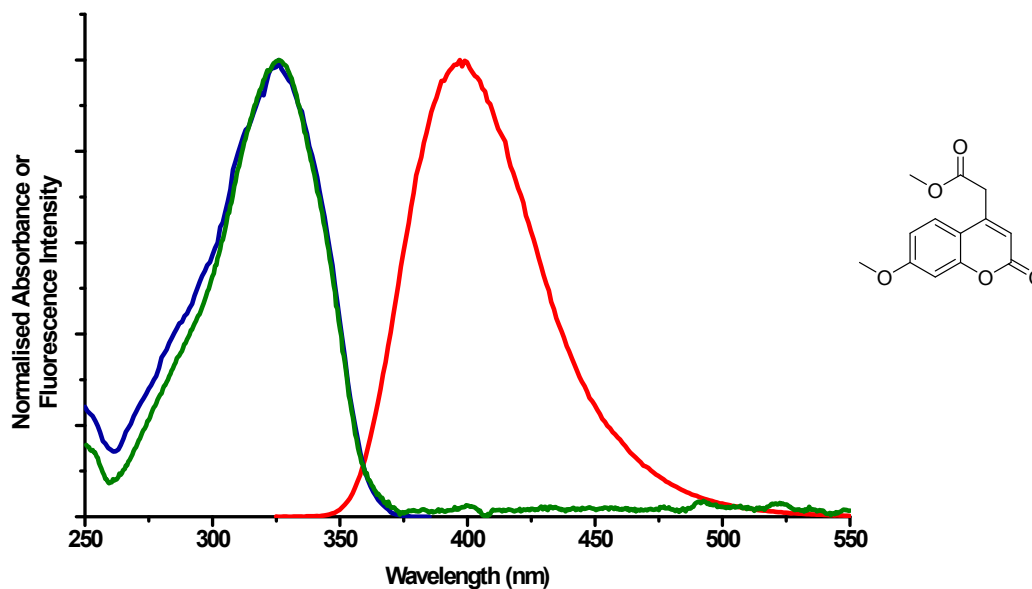

Absorption (green), excitation (blue,  $\lambda_{em} = 390$  nm), emission (red,  $\lambda_{ex} = 315$  nm) spectra in PBS (pH 7.4, 0.1 M phosphate + 0.15 M NaCl) at 25 °C.

##### 2-(7-Methoxy-2-oxo-2H-chromen-4-yl)acetic acid 2

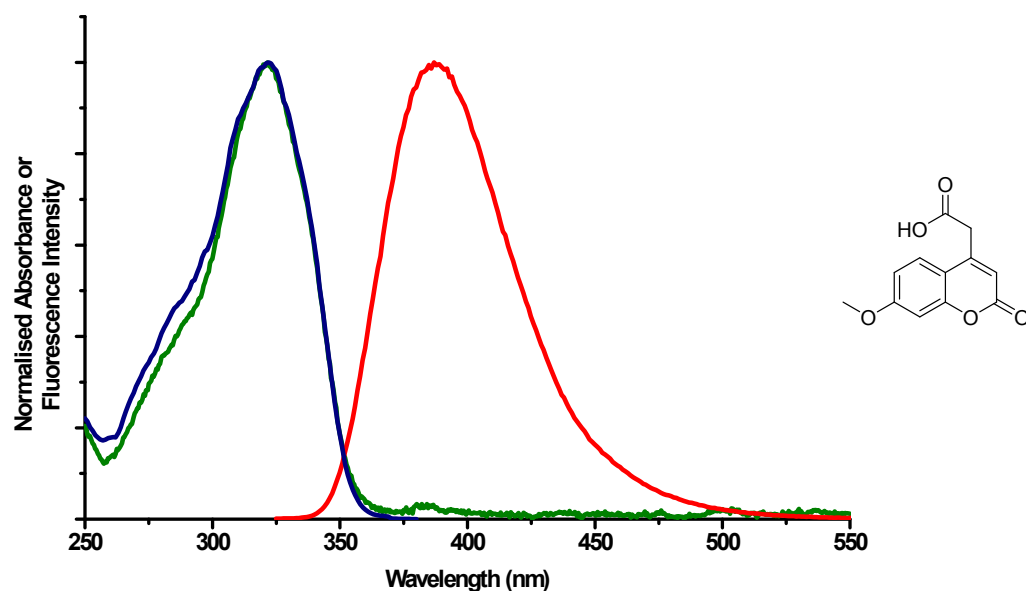

Absorption (green), excitation (blue,  $\lambda_{em} = 390$  nm), emission (red,  $\lambda_{ex} = 315$  nm) spectra in PBS (pH 7.4, 0.1 M phosphate + 0.15 M NaCl) at 25 °C.

**(3-((4-(2-methoxy-2-oxoethyl)-2-oxo-2H-chromen-7-yl)oxy)-propyl)triphenylphosphonium bromide 5**

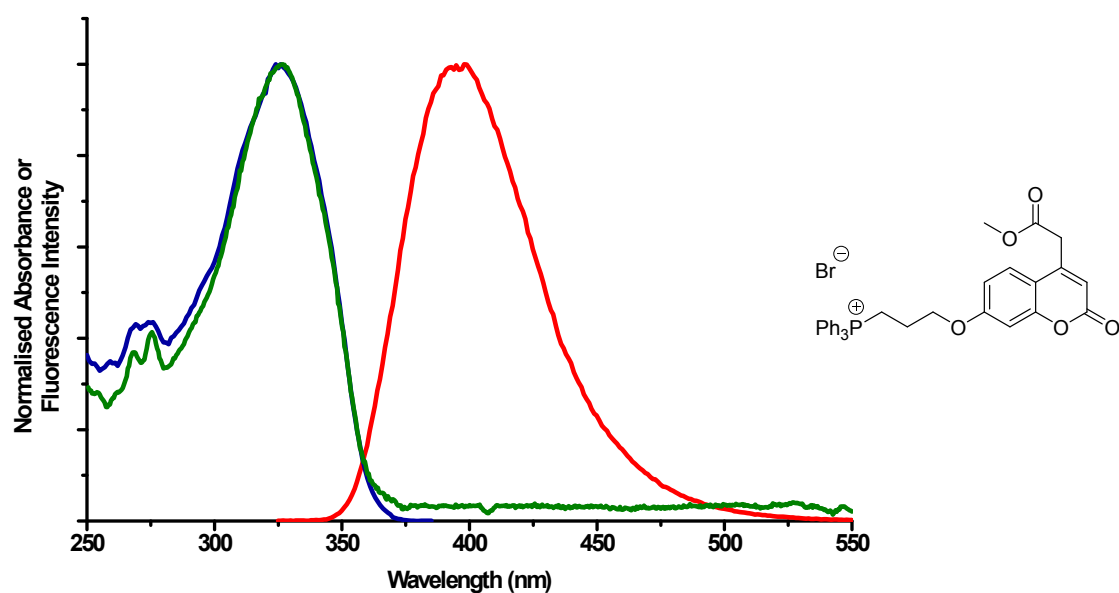

Absorption (green), excitation (blue,  $\lambda_{em} = 390$  nm), emission (red,  $\lambda_{ex} = 315$  nm) spectra in PBS (pH 7.4, 0.1 M phosphate + 0.15 M NaCl) at 25 °C.

**3-((4-(2-methoxy-2-oxoethyl)-2-oxo-2H-chromen-7-yl)oxy)-N,N,N-trimethylpropan-1-aminium bromide 6**

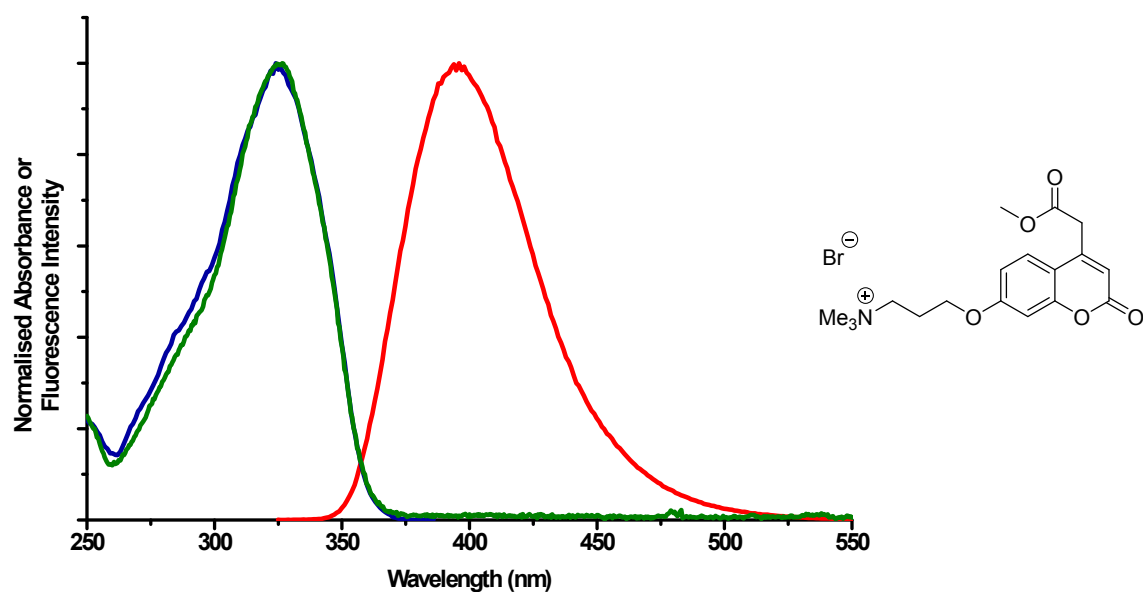

Absorption (green), excitation (blue,  $\lambda_{em} = 390$  nm), emission (red,  $\lambda_{ex} = 315$  nm) spectra in PBS (pH 7.4, 0.1 M phosphate + 0.15 M NaCl) at 25 °C.

**(3-((4-(carboxymethyl)-2-oxo-2H-chromen-7-yl)oxy)propyl)-triphenylphosphonium bromide 7**

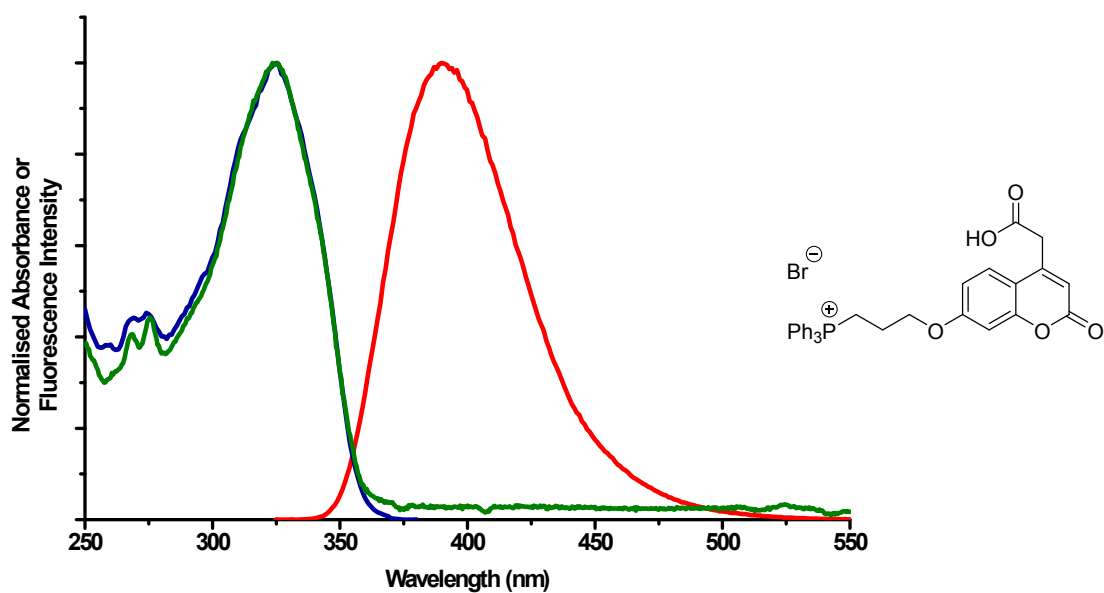

Absorption (green), excitation (blue,  $\lambda_{em} = 390$  nm), emission (red,  $\lambda_{ex} = 315$  nm) spectra in PBS (pH 7.4, 0.1 M phosphate + 0.15 M NaCl) at 25 °C.

**(3-((2-oxo-4-(2-oxo-2-(prop-2-yn-1-ylamino)ethyl)-2H-chromen-7-yl)oxy)propyl)triphenylphosphonium bromide 10**

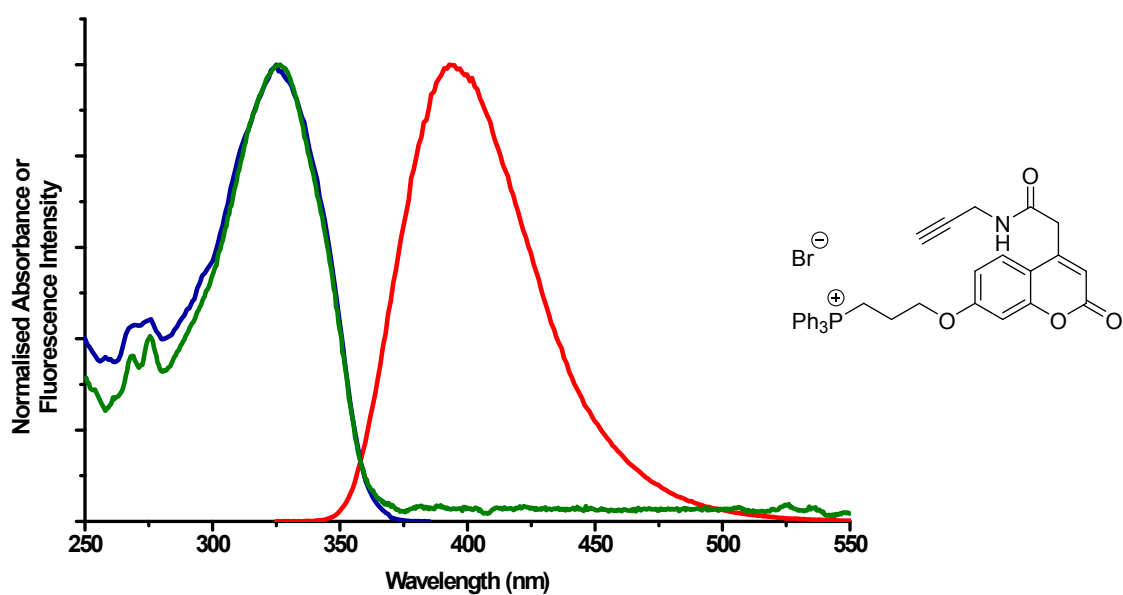

Absorption (green), excitation (blue,  $\lambda_{em} = 390$  nm), emission (red,  $\lambda_{ex} = 315$  nm) spectra in PBS (pH 7.4, 0.1 M phosphate + 0.15 M NaCl) at 25 °C.

**(3-((4-(2-((3-aminopropyl)amino)-2-oxoethyl)-2-oxo-2H-chromen-7-yl)oxy)propyl)triphenyl-phosphonium bromide 13**

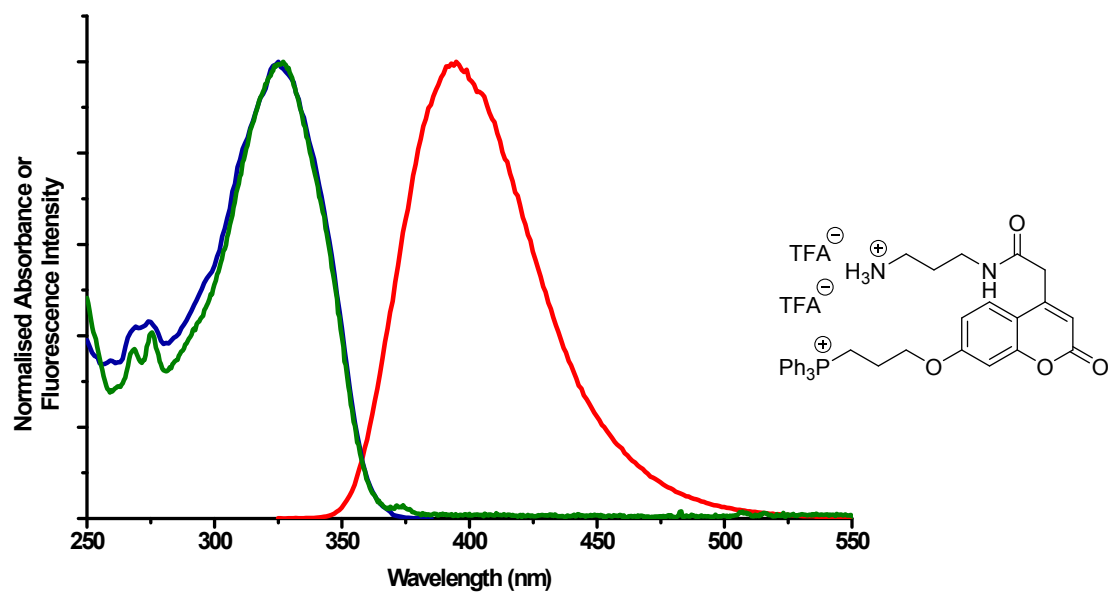

Absorption (green), excitation (blue,  $\lambda_{em} = 390$  nm), emission (red,  $\lambda_{ex} = 315$  nm) spectra in PBS (pH 7.4, 0.1 M phosphate + 0.15 M NaCl) at 25 °C.

**(3-((4-(2-((3-(2-iodoacetamido)propyl)amino)-2-oxoethyl)-2-oxo-2H-chromen-7-yl)oxy)propyl)triphenyl-phosphonium 2,2,2-trifluoroacetate 14**

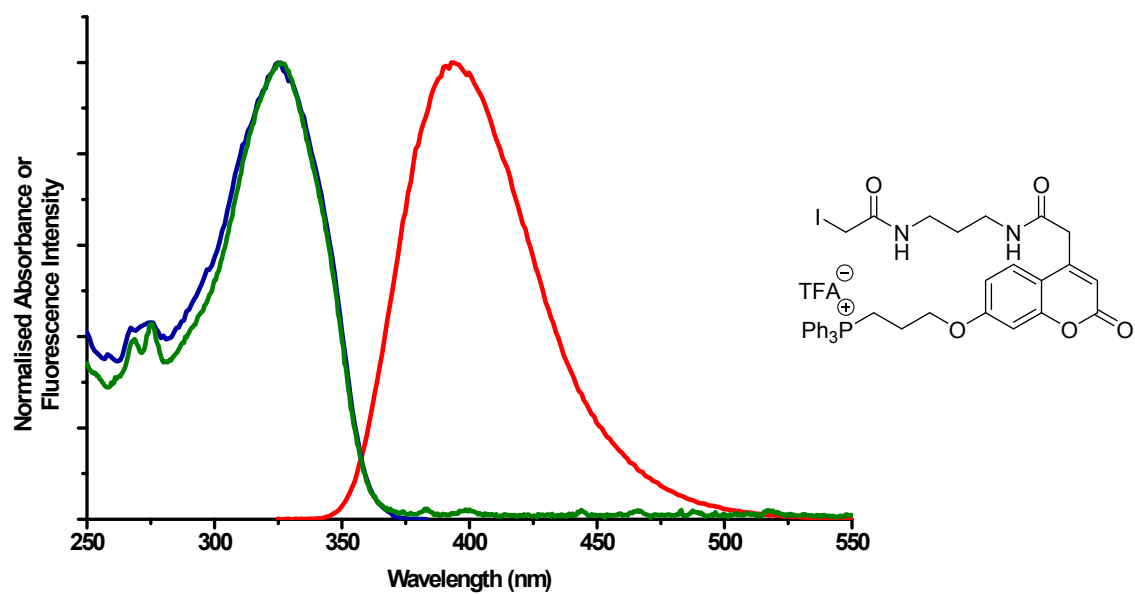

Absorption (green), excitation (blue,  $\lambda_{em} = 390$  nm), emission (red,  $\lambda_{ex} = 315$  nm) spectra in PBS (pH 7.4, 0.1 M phosphate + 0.15 M NaCl) at 25 °C.

(3-((4-(2-((3-(6-(5-ethoxy-2-methyloxazol-4-yl)hexanamido)propyl)amino)-2-oxoethyl)-2-oxo-2H-chromen-7-yl)oxy)propyl)triphenylphosphonium 2,2,2-trifluoroacetate 15

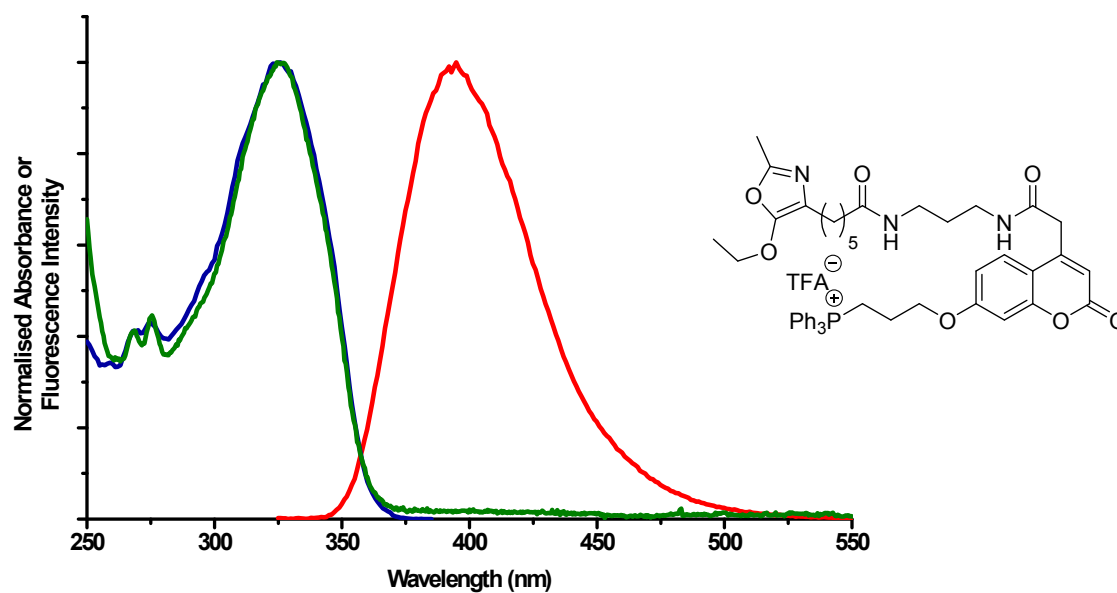

Absorption (green), excitation (blue,  $\lambda_{em} = 390$  nm), emission (red,  $\lambda_{ex} = 315$  nm) spectra in PBS (pH 7.4, 0.1 M phosphate + 0.15 M NaCl) at 25 °C.

## 2) Absorption of the quencher, emission of coumarins 2 and 7 spectra superimposition

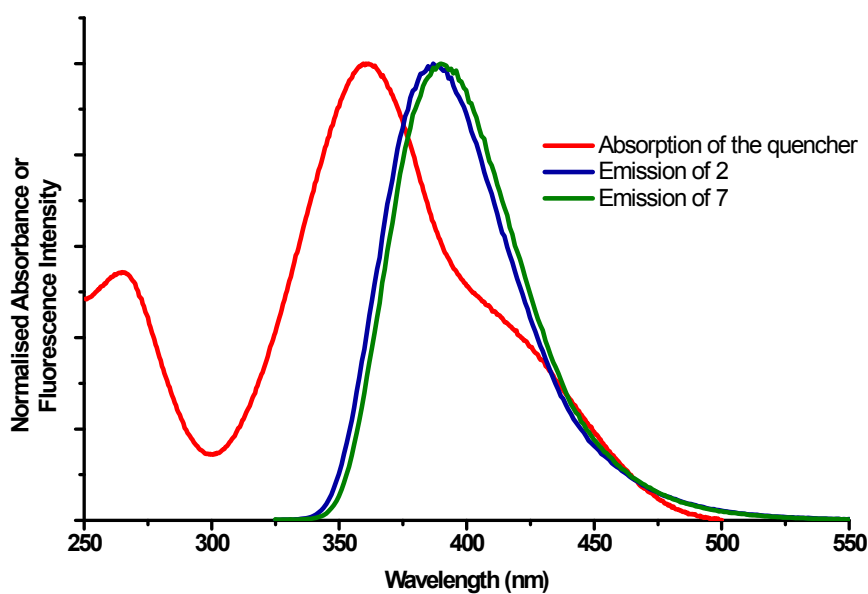

Quencher (2,4-dinitrophenyl)glycine absorption (red), coumarin 2 emission (blue,  $\lambda_{ex} = 315$  nm), coumarin 7 emission (green,  $\lambda_{ex} = 315$  nm), spectra in PBS (pH 7.4, 0.1 M phosphate + 0.15 M NaCl) at 25 °C.

### 3) Quenching efficiency and fluorescence exaltation of probes 19 and 20 after BACE-1 hydrolysis

(MOCAc)-Ser-Glu-Val-Asn-Leu-Asp-Ala-Glu-Phe-Lys-(DNPA)-Arg-Arg 19

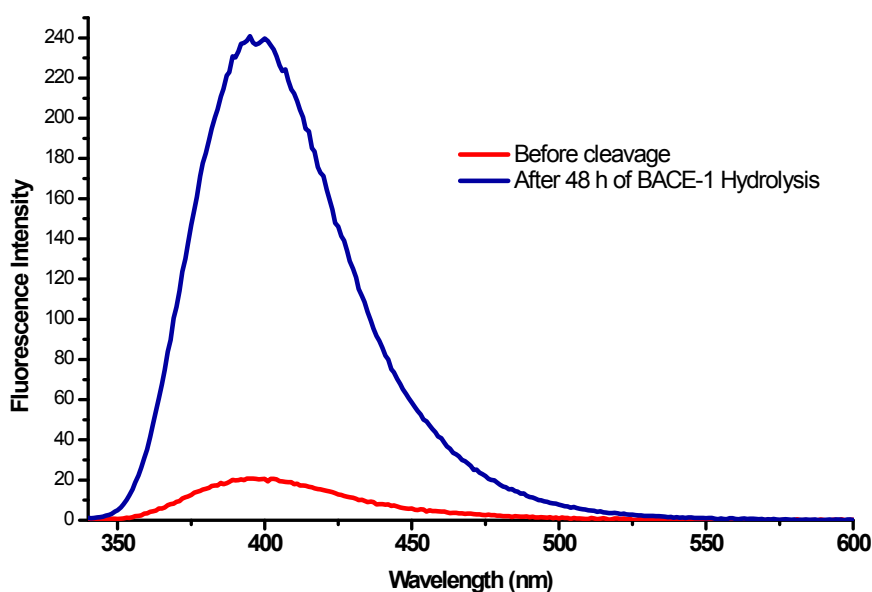

Emission ( $\lambda_{ex}$  = 328 nm) spectra in acetate buffer (pH 4.48, 0.1 M) at 25 °C.

Quenching Efficiency = 91 %

Fluorescence Exaltation = 11

(PPh<sub>3</sub>C)-Ser-Glu-Val-Asn-Leu-Asp-Ala-Glu-Phe-Lys-(DNPA)-Arg-Arg 20

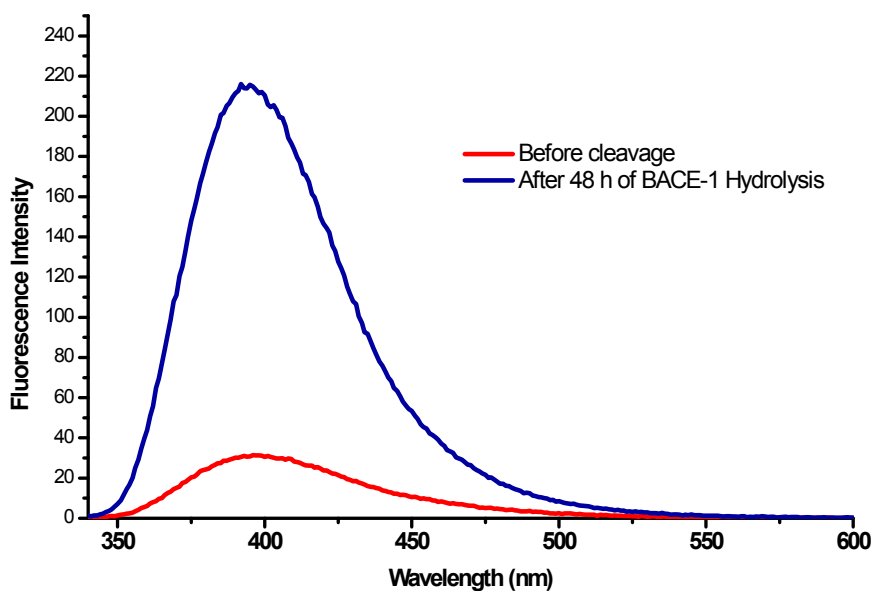

Emission ( $\lambda_{ex}$  = 328 nm) spectra in acetate buffer (pH 4.48, 0.1 M) at 25 °C.

Quenching Efficiency = 84 %

Fluorescence Exaltation = 6.2

#### 4) Quenching efficiency and fluorescence exaltation of probes 19 and 20 after $\alpha$ -Chymotrypsin hydrolysis

(MOCAC)-Ser-Glu-Val-Asn-Leu-Asp-Ala-Glu-Phe-Lys-(DNPA)-Arg-Arg 19

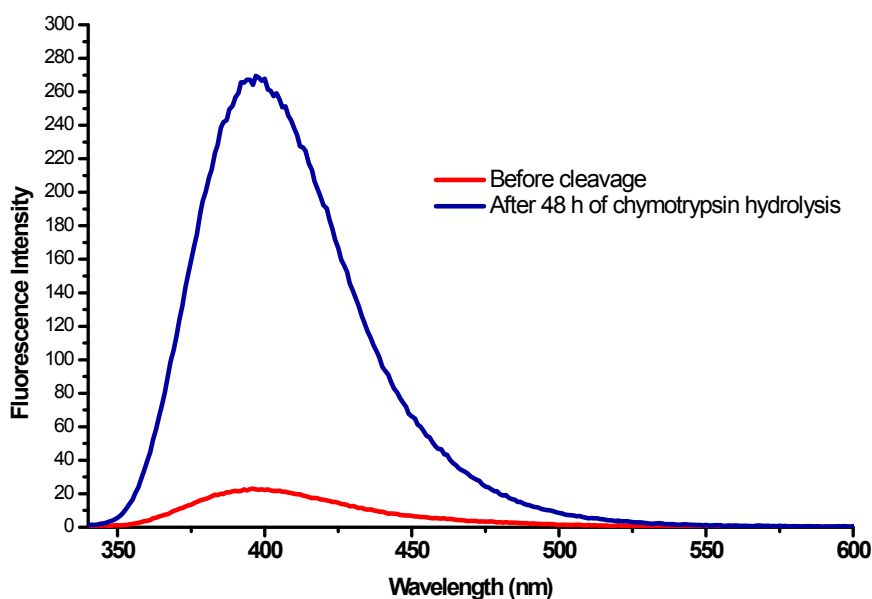

Emission ( $\lambda_{ex}$  = 328 nm) spectra in Tris buffer (pH 7.8, 0.1 M Tris + 10 mM  $CaCl_2$ ) at 25 °C.

Quenching Efficiency = 91 %

Fluorescence Exaltation = 10.7

(PPh<sub>3</sub>C)-Ser-Glu-Val-Asn-Leu-Asp-Ala-Glu-Phe-Lys-(DNPA)-Arg-Arg 20

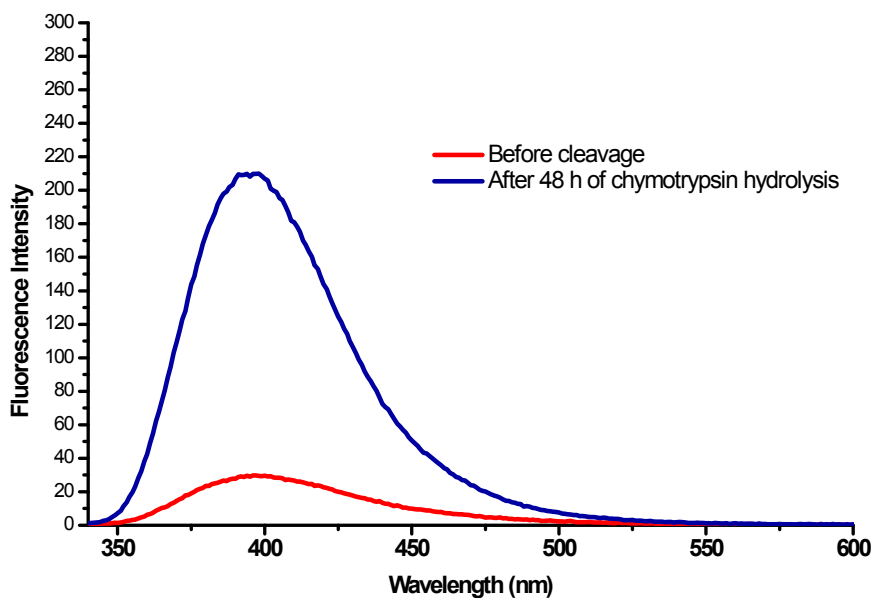

Emission ( $\lambda_{ex}$  = 328 nm) spectra in Tris buffer (pH 7.8, 0.1 M Tris + 10 mM  $CaCl_2$ ) at 25 °C.

Quenching Efficiency = 84 %

Fluorescence Exaltation = 6.3

## 5) Absorption, excitation, emission spectra of naphthalimide derivatives

### 2-(prop-2-yn-1-yl)-6-(propylamino)-1H-benzo[de]isoquinoline-1,3(2H)-dione 28

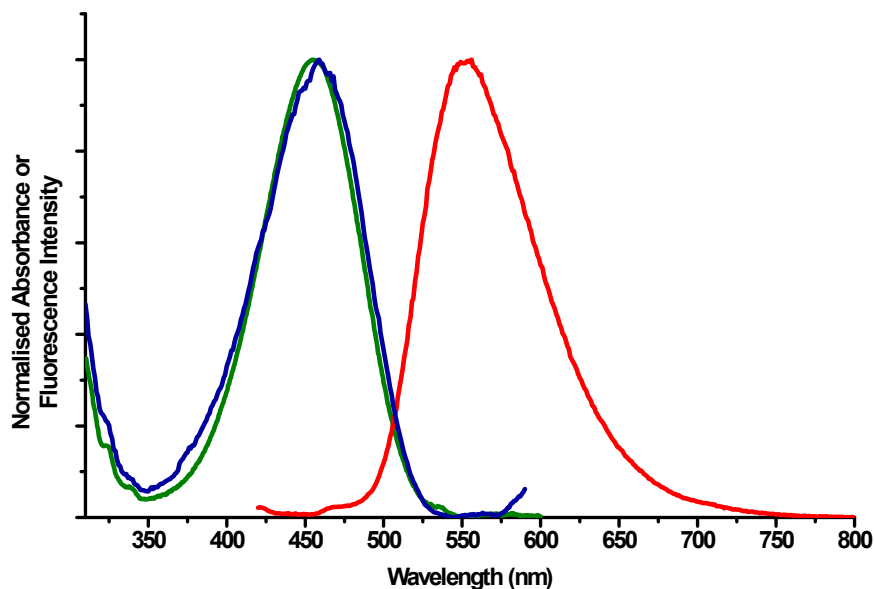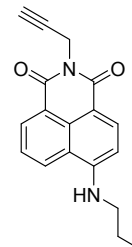

Absorption (green), excitation (blue,  $\lambda_{em} = 600$  nm), emission (red,  $\lambda_{ex} = 410$  nm) spectra in PBS (pH 7.4, 0.1 M phosphate + 0.15 M NaCl) at 25 °C.

### (3-((1,3-dioxo-2-(prop-2-yn-1-yl)-2,3-dihydro-1H-benzo[de]isoquinolin-6-yl)amino)propyl)triphenylphosphonium bromide 29

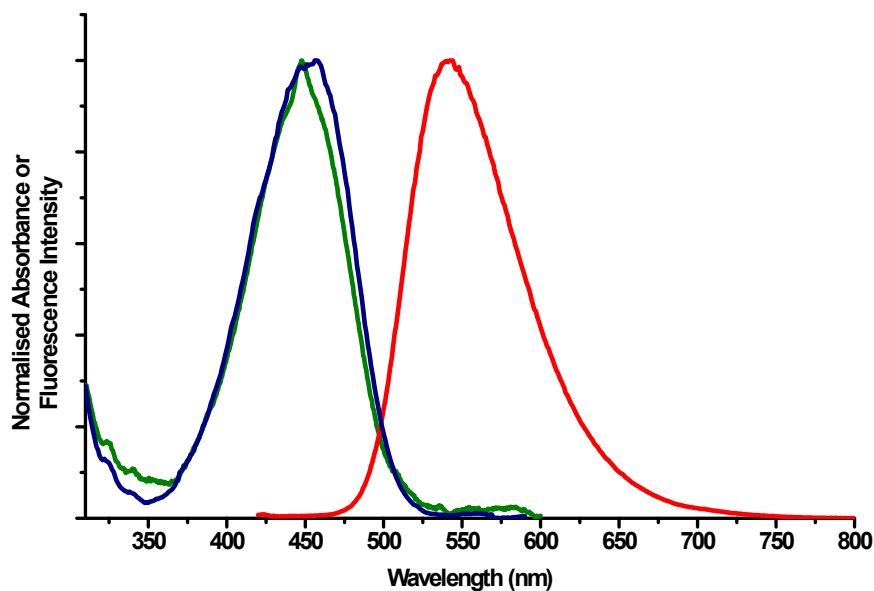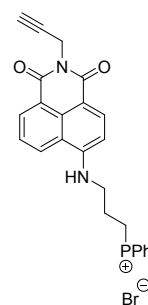

Absorption (green), excitation (blue,  $\lambda_{em} = 600$  nm), emission (red,  $\lambda_{ex} = 410$  nm) spectra in PBS (pH 7.4, 0.1 M phosphate + 0.15 M NaCl) at 25 °C.



## 6) Absorption, excitation, emission spectra of labeled BSA

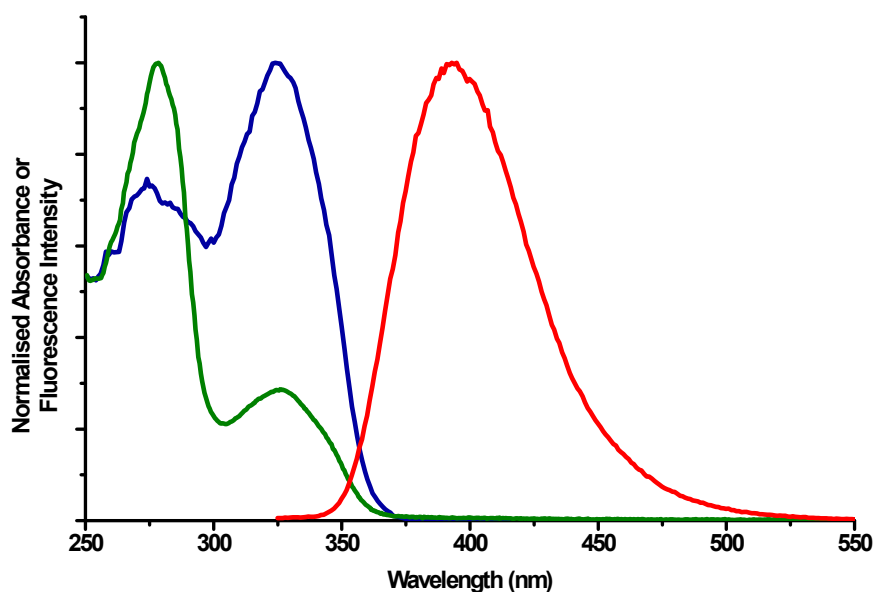

Absorption (green), excitation (blue,  $\lambda_{em} = 425$  nm), emission (red,  $\lambda_{ex} = 315$  nm) spectra in milliQ water at 25 °C.

## 7) Determination of $F/P$ ratio of labeled BSA

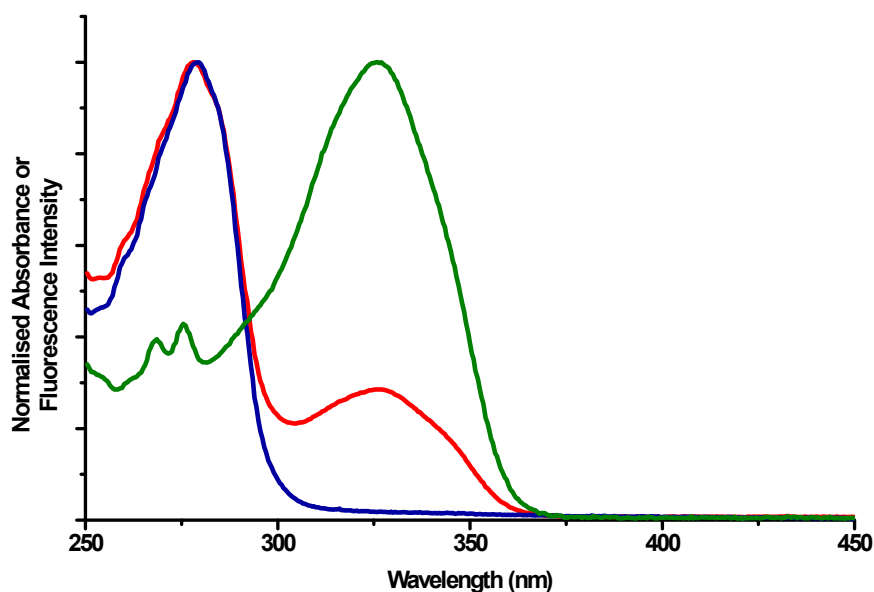

Absorption spectra of unlabeled BSA (blue), Absorption spectra of **14** (green), absorption spectra of labeled BSA (red) in PBS (pH 7.4, 0.1 M phosphate + 0.15 M NaCl) at 25 °C.

The degree of labeling of the BSA protein, *i.e.* the fluorophore:protein ( $F/P$ ) molar ratios, were estimated from the relative intensities of protein and dye absorption, according to the following equation:

$$\frac{F}{P} = \frac{C_f}{C_p} = \frac{\epsilon_{P,280} A_{326}}{\epsilon_{F,326} (A_{280} - (f \times A_{326}))}$$

The molar absorption coefficient of the BSA protein  $\epsilon_{p,280}$  was determined to be  $45551 \text{ M}^{-1} \text{ cm}^{-1}$  at 280 nm in milliQ water at 25 °C. The molar absorption coefficient of **14**  $\epsilon_{F,326}$  was determined to be  $12252 \text{ M}^{-1} \text{ cm}^{-1}$  at 326 nm in milliQ water at 25 °C. The correction factor  $f$  equal to the ration of fluorophore absorbance at 280 and 326 nm was calculated to be 0.3469.

For labeled BSA protein,  $A_{280} = 0.4077$  and  $A_{326} = 0.1186$ ; allowing  $F/P = 1.2$ .

## 4) Mass spectrometry analyses

1) ESI-MS analysis of a  $2.17 \times 10^2 \mu\text{M}$  solution of coumarins 1 - 5 -6 in a 1:1:1 molar ratio.

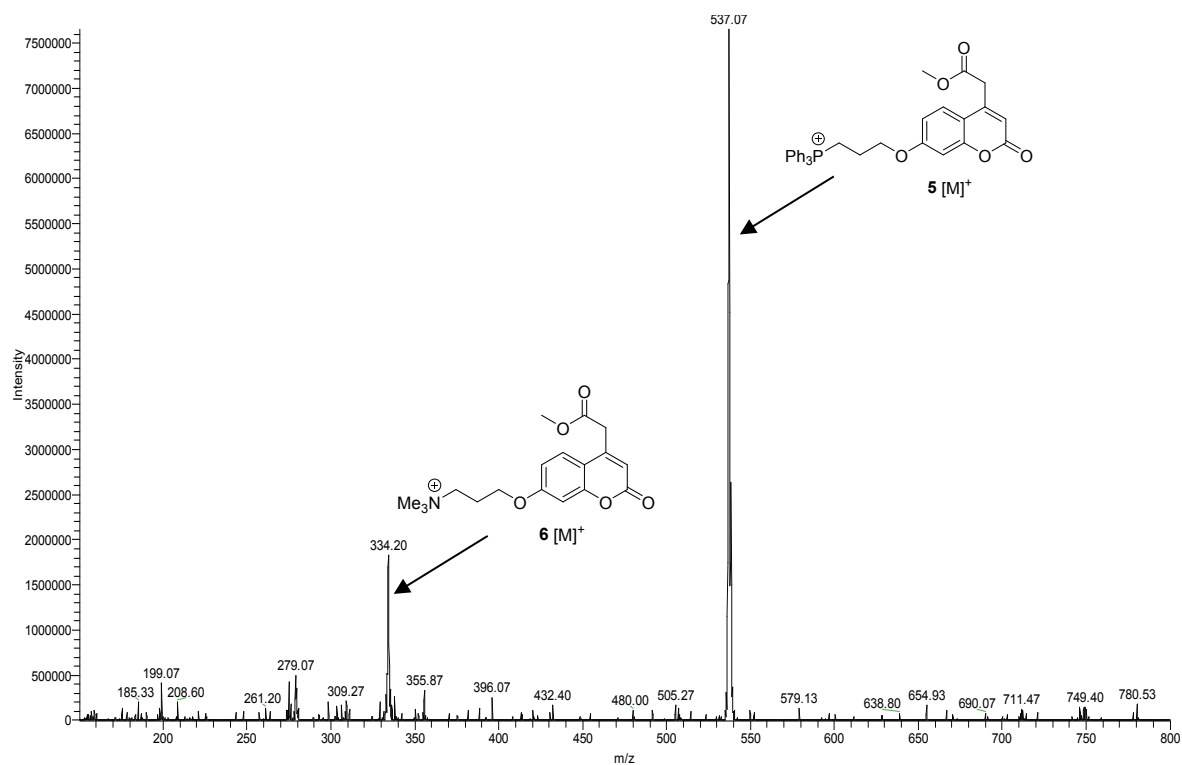

ESI-MS parameters : ESI<sup>+</sup>; Full scan mode; Sheath Gas Flow Rate (arb): 20; Aux/Sweep Gas Flow Rate (arb): 0; I Spray Voltage (kV) I: 5.4; Capillary Temp (°C): 220; Capillary Voltage (V): 36; Tube Lens Offset (V): 50; Injection flow rate (ml/min): 0.25

**2) ESI-MS analysis of a  $5 \times 10^2 \mu\text{M}$  solution of peptide 16-17 in a 1:1 molar ratio.**

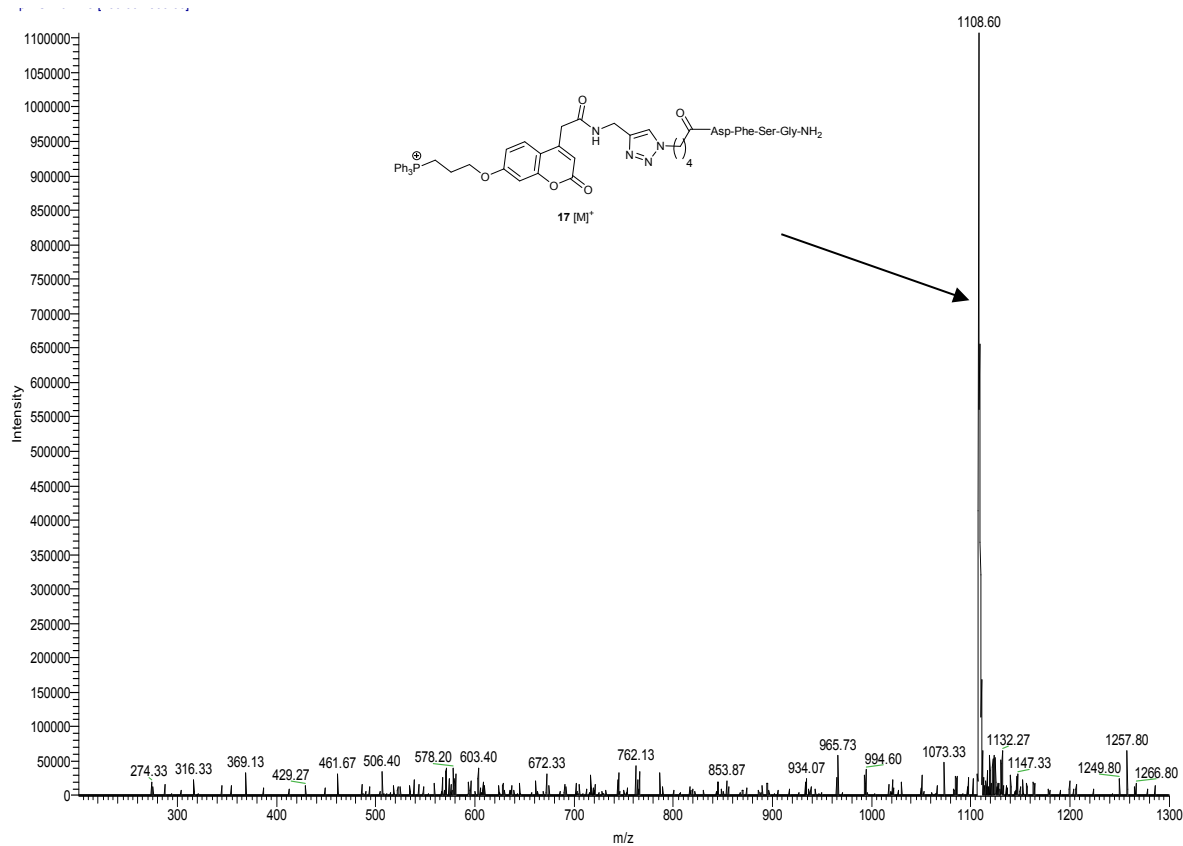

ESI-MS parameters : ESI<sup>+</sup>; Full scan mode; Sheath Gas Flow Rate (arb): 20; Aux/Sweep Gas Flow Rate (arb): 0; I Spray Voltage (kV) I: 5.4; Capillary Temp (°C): 220; Capillary Voltage (V): 36; Tube Lens Offset (V): 50; Injection flow rate (ml/min): 0.25

**3) ESI-MS analysis of a  $2.17 \times 10^2 \mu\text{M}$  solution of 28 and 29 in a 1:1 molar ratio.**

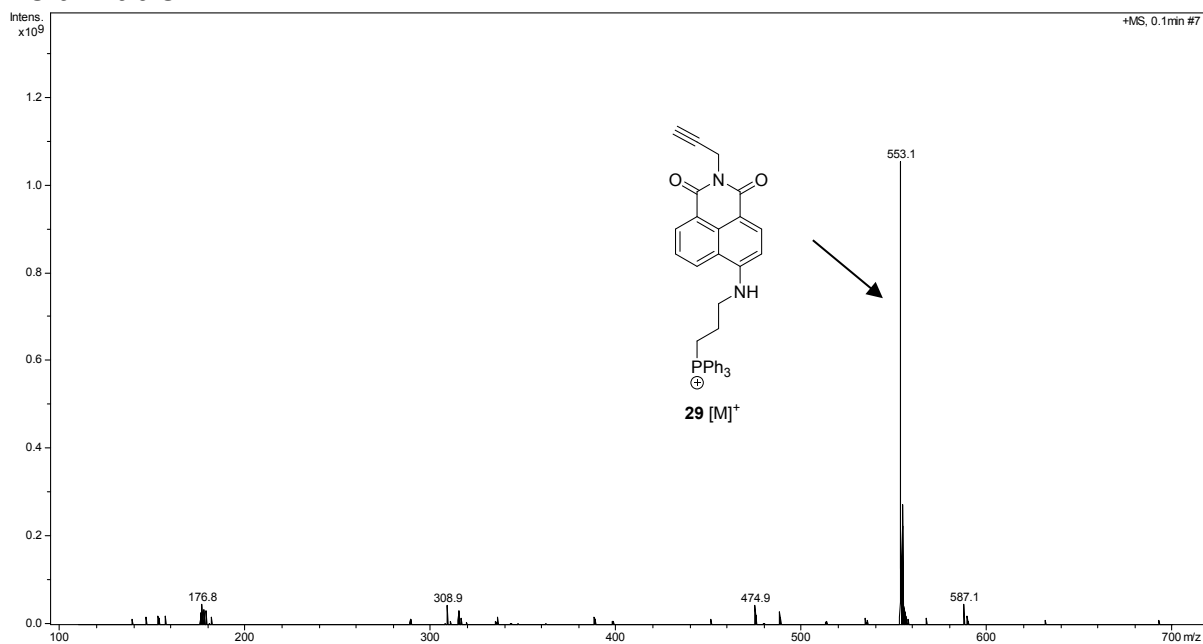

ESI-MS parameters (HCT Ultra ETD II mass spectrometer): ESI<sup>+</sup>; Full scan mode; Nebulizer Gas Flow Rate (Psi): 20; Dry Gas Flow Rate (L/min.): 5; Dry Temp (°C): 300; Capillary Voltage (V): -3000; Skimmer (V): 40; Injection flow rate (ml/min): 0.25.

#### 4) LC-MS analysis of the crude BACE1-mediated hydrolysis (solution of 19 and 20 at 25 $\mu\text{M}$ ).

(MOCAc)-Ser-Glu-Val-Asn-Leu-Asp-Ala-Glu-Phe-Lys-(DNPA)-Arg-Arg 19

Total ion current (TIC) chromatogram:

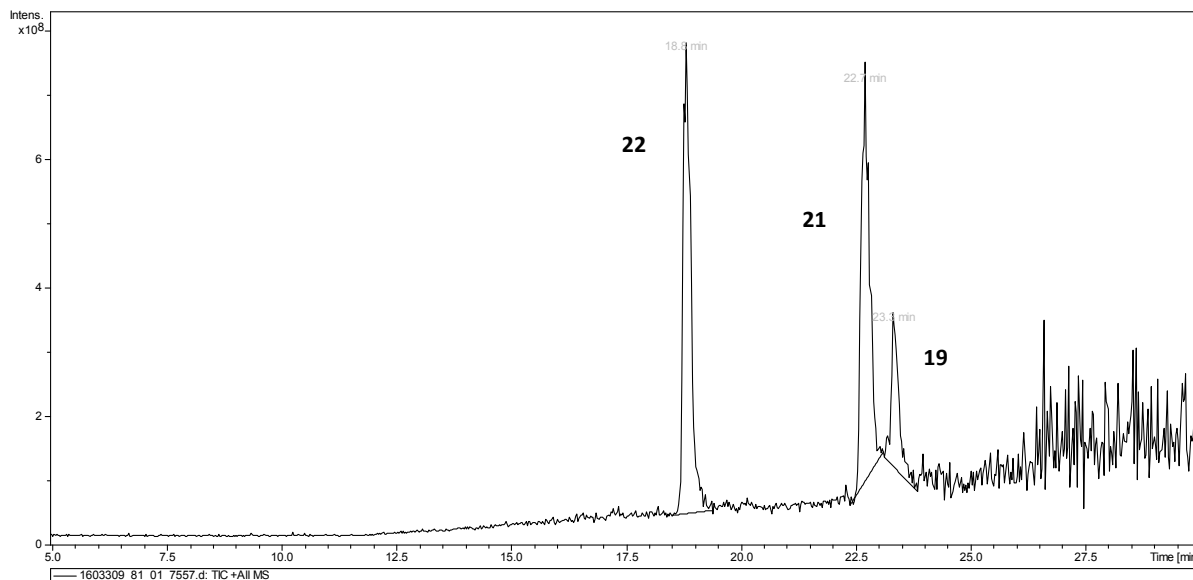

ESI mass spectrum of the compound 22 ( $t_R = 18.8$  min).

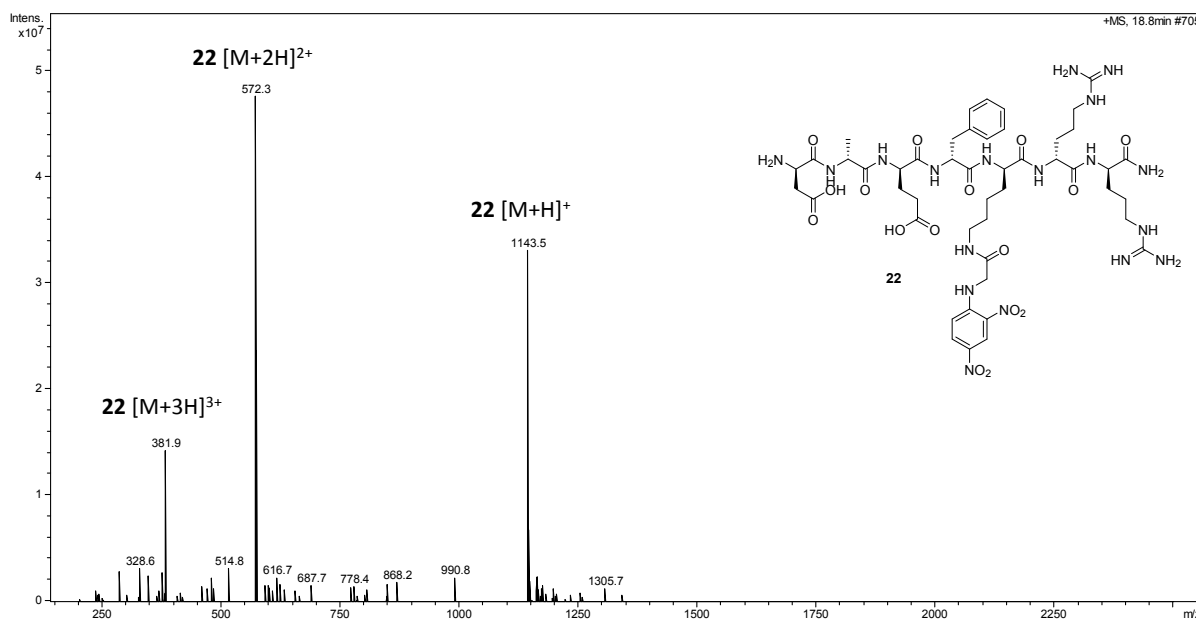

ESI mass spectrum of the compound **21** ( $t_R = 22.7$  min).

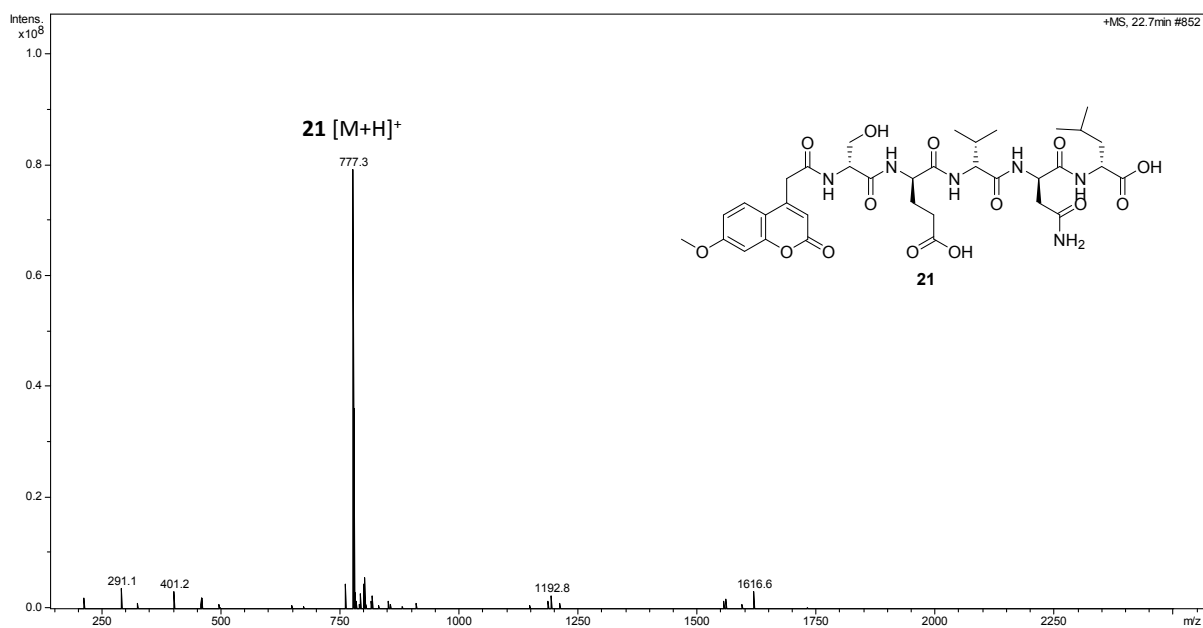

ESI mass spectrum of the compound **19** ( $t_R = 23.3$  min).

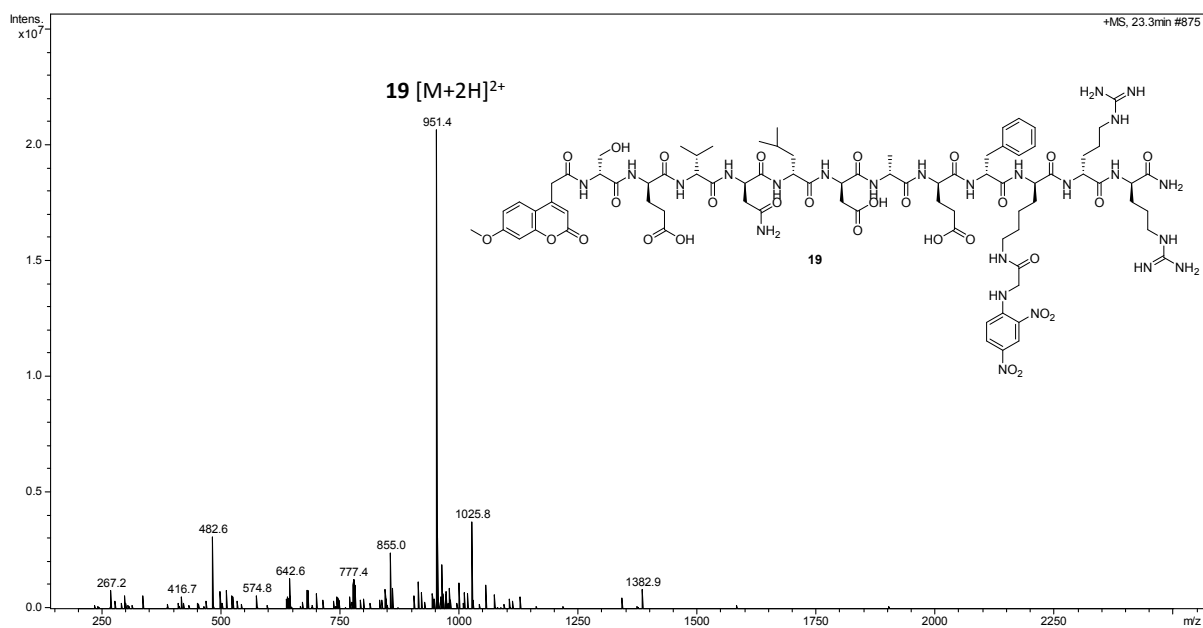

**(PPh<sub>3</sub>C)-Ser-Glu-Val-Asn-Leu-Asp-Ala-Glu-Phe-Lys-(DNPA)-Arg-Arg 20**

Total ion current (TIC) chromatogram:

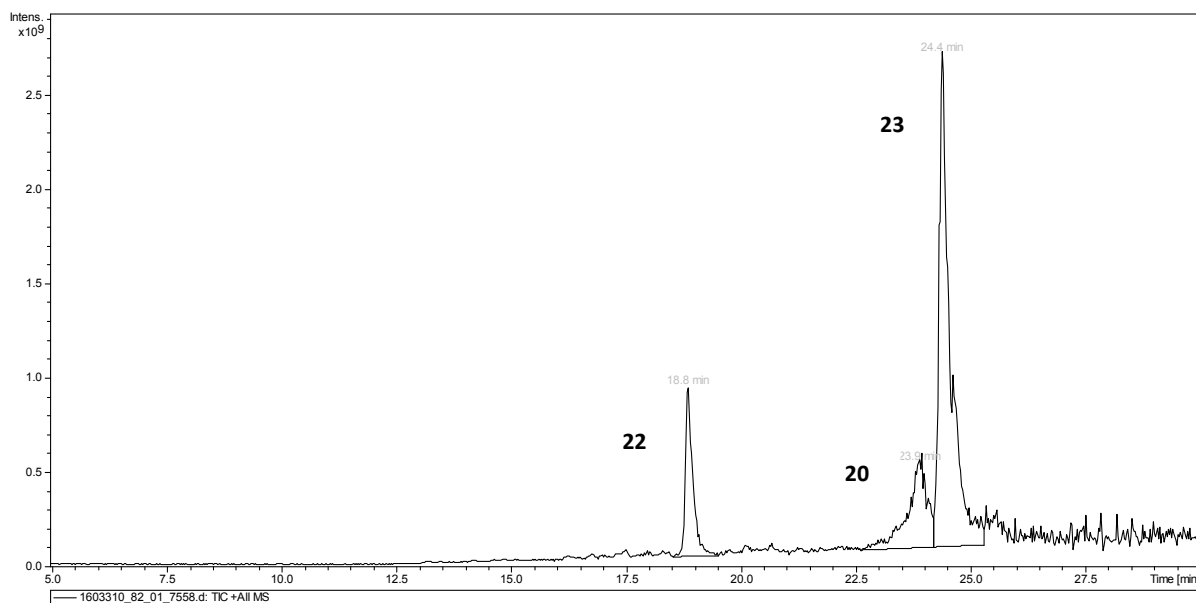

ESI mass spectrum of the compound **22**. ( $t_R = 18.8$  min)

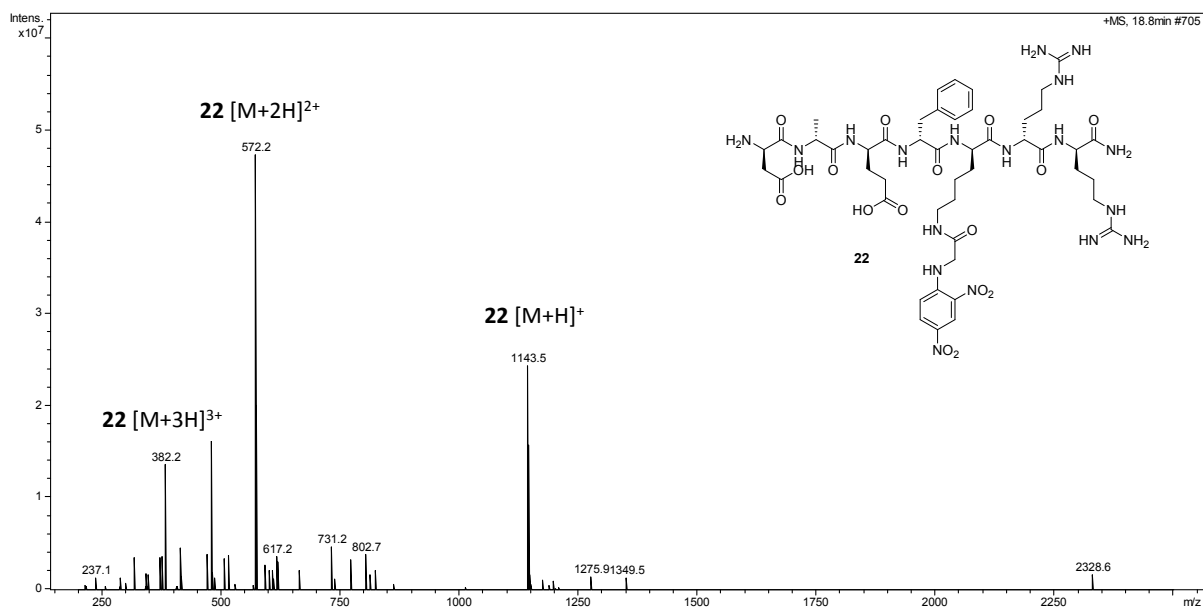

ESI mass spectrum of the compound **23** ( $t_R = 24.4$  min).

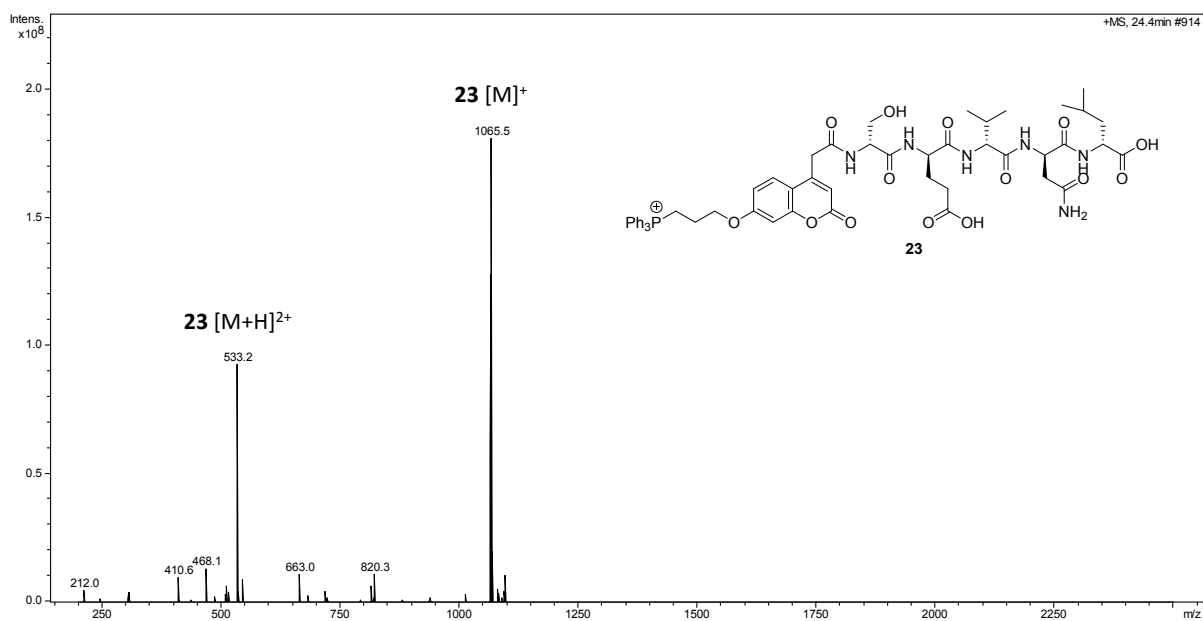

ESI mass spectrum of the compound **20** ( $t_R = 23.9$  min).

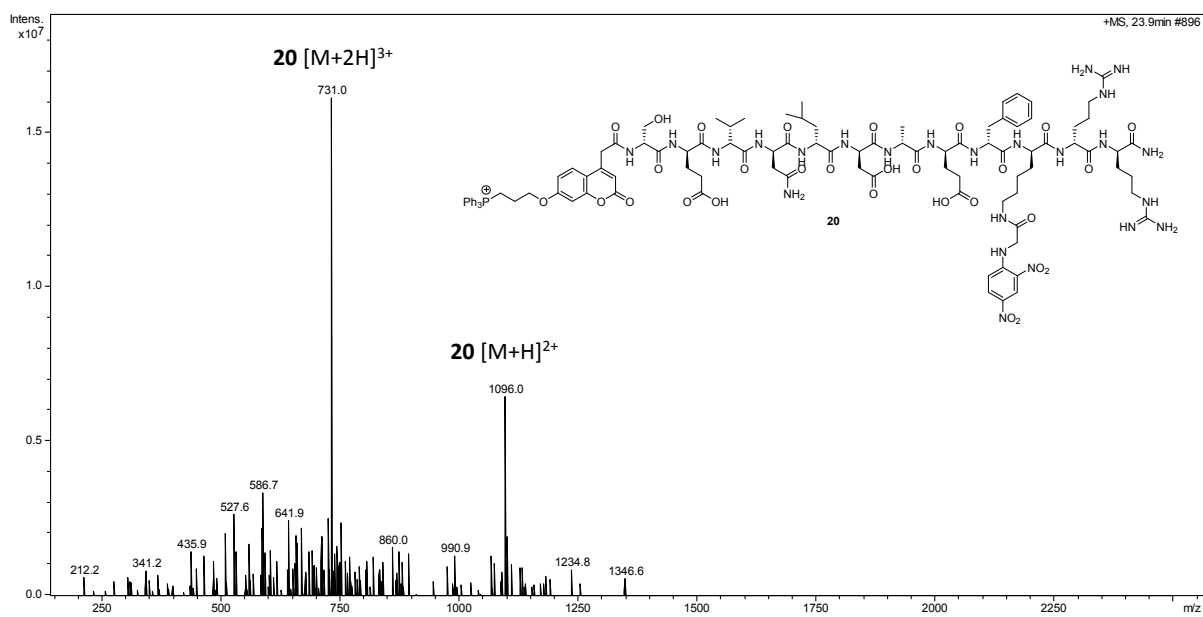



## 5) LC -MS analysis of the crude $\alpha$ -Chymotrypsin-mediated hydrolysis (solution of 19 and 20 at 25 $\mu$ M).

(MOCAc)-Ser-Glu-Val-Asn-Leu-Asp-Ala-Glu-Phe-Lys-(DNPA)-Arg-Arg 19

Total ion current (TIC) chromatogram:

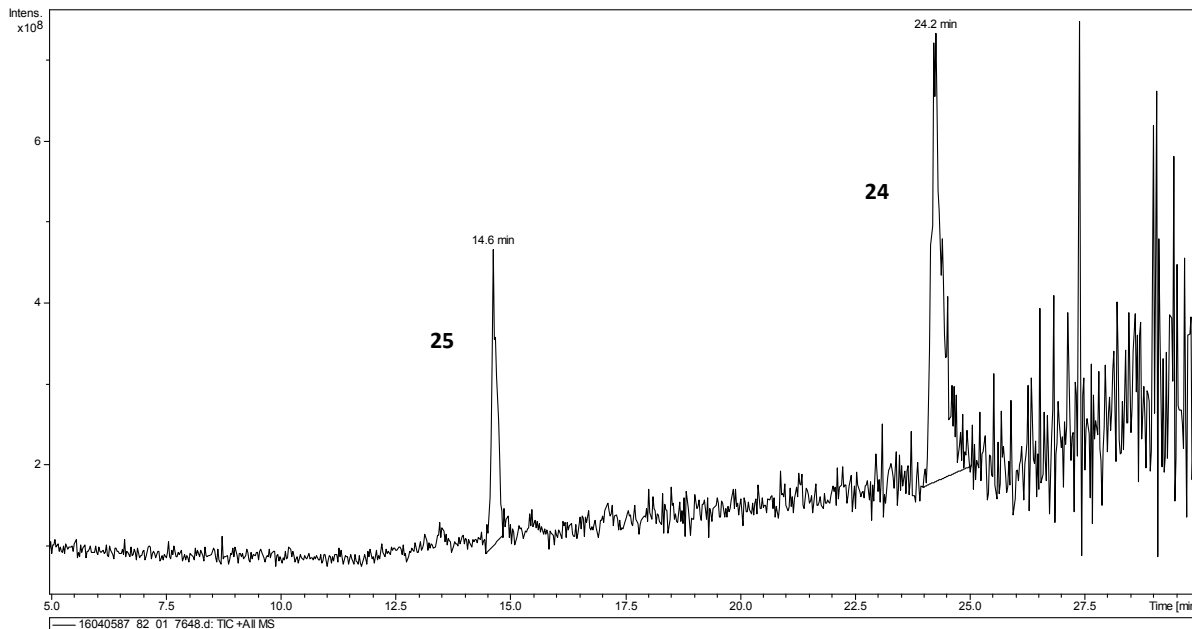

ESI mass spectrum of the compound 25 ( $t_R = 14.6$  min).

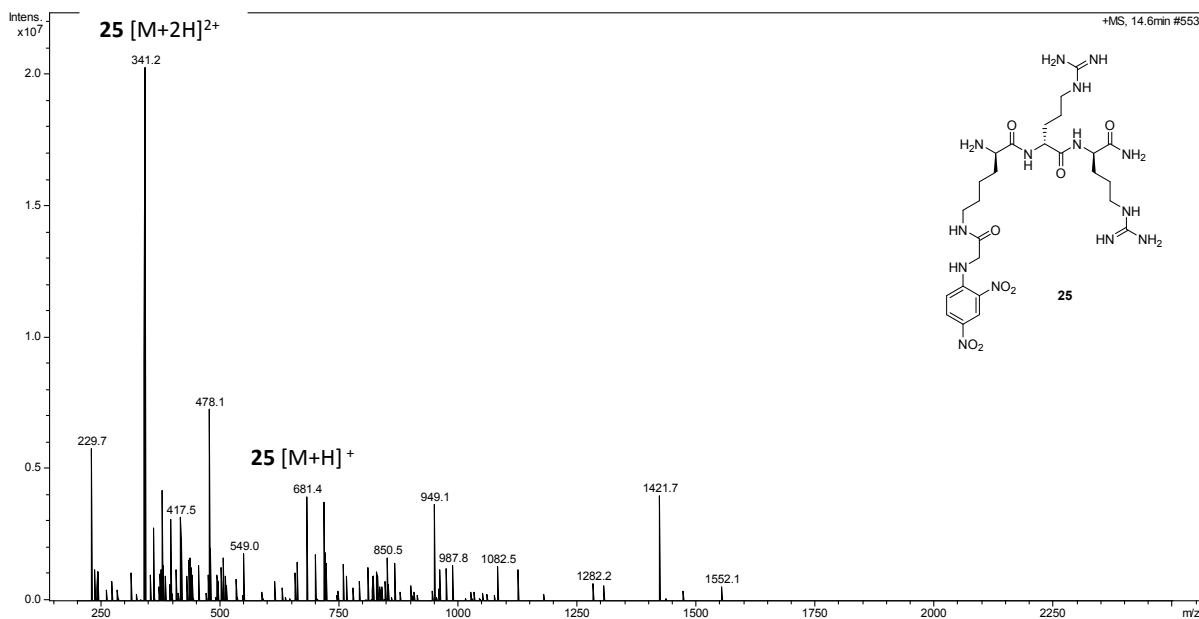

ESI mass spectrum of the compound **24** ( $t_R = 24.2$  min).

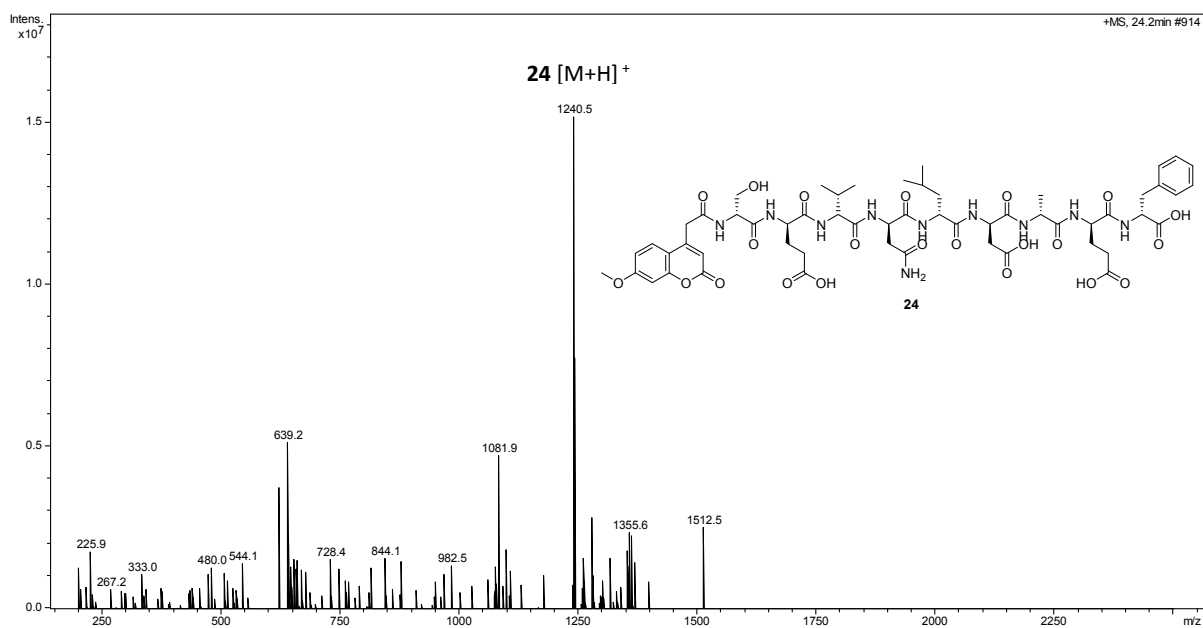

**(PPh<sub>3</sub>C)-Ser-Glu-Val-Asn-Leu-Asp-Ala-Glu-Phe-Lys-(DNPA)-Arg-Arg 20**

Total ion current (TIC) chromatogram:

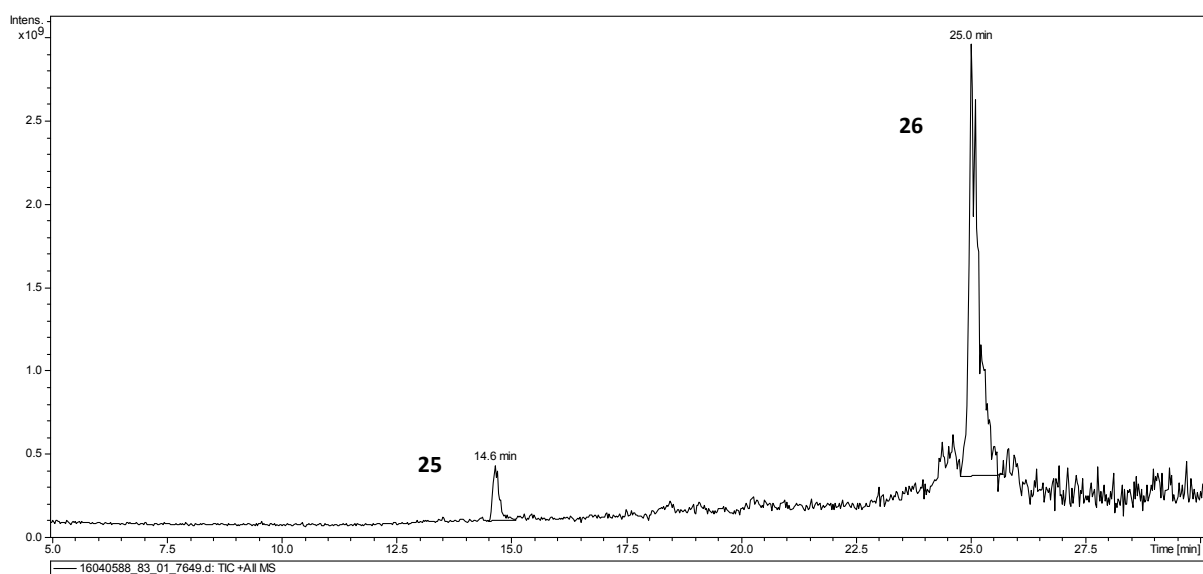

ESI mass spectrum of the compound **25** ( $t_R = 14.6$  min).

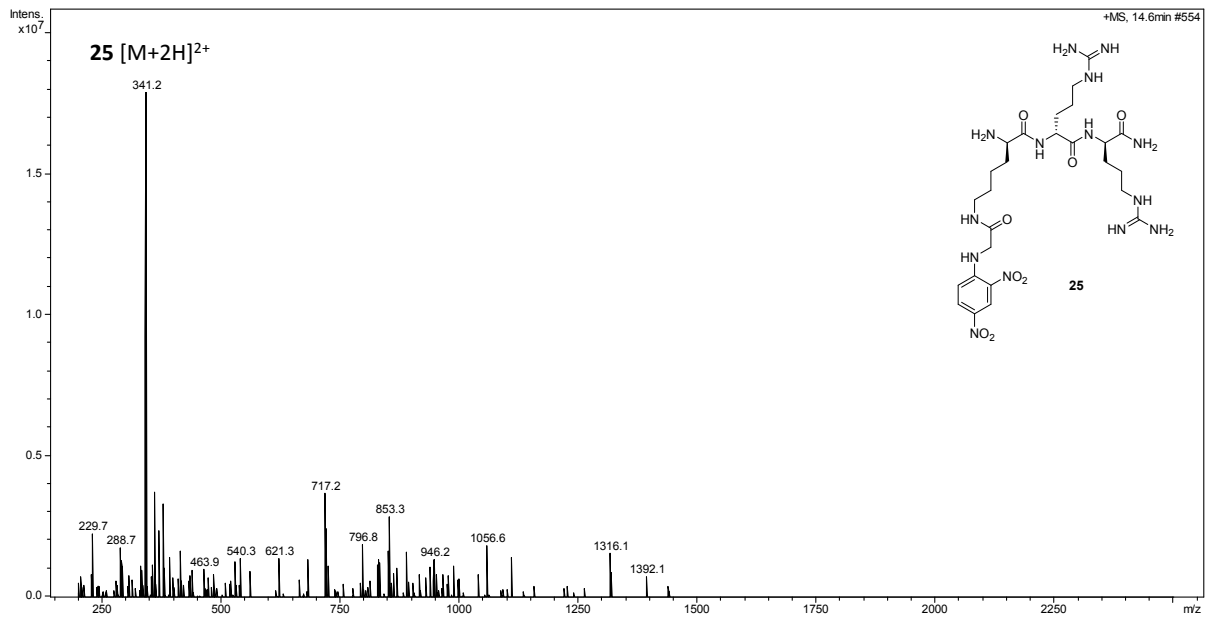

ESI mass spectrum of the compound **26** ( $t_R = 25.0$  min).

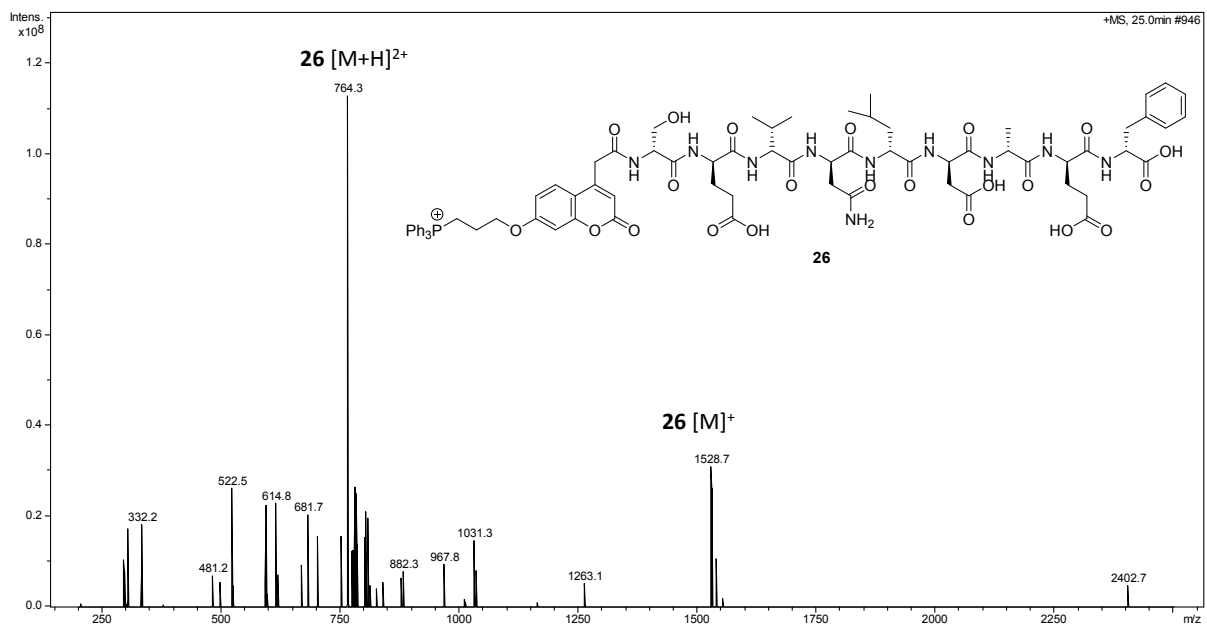

## 6) MALDI-TOF analysis of unlabeled and labeled BSA protein.

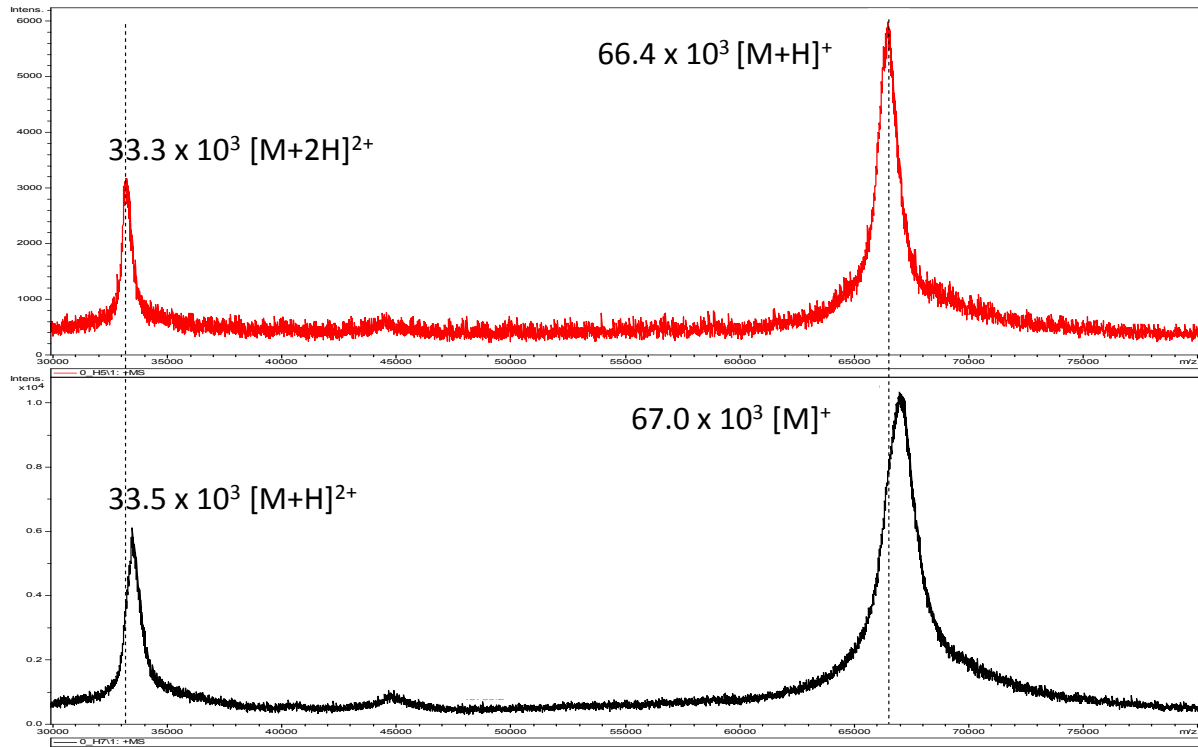

MALDI-TOF analysis of unlabeled BSA (red) and labeled (black) protein.

## 7) MALDI mass spectra of Chymotrypsin and Trypsin digests of modified BSA.

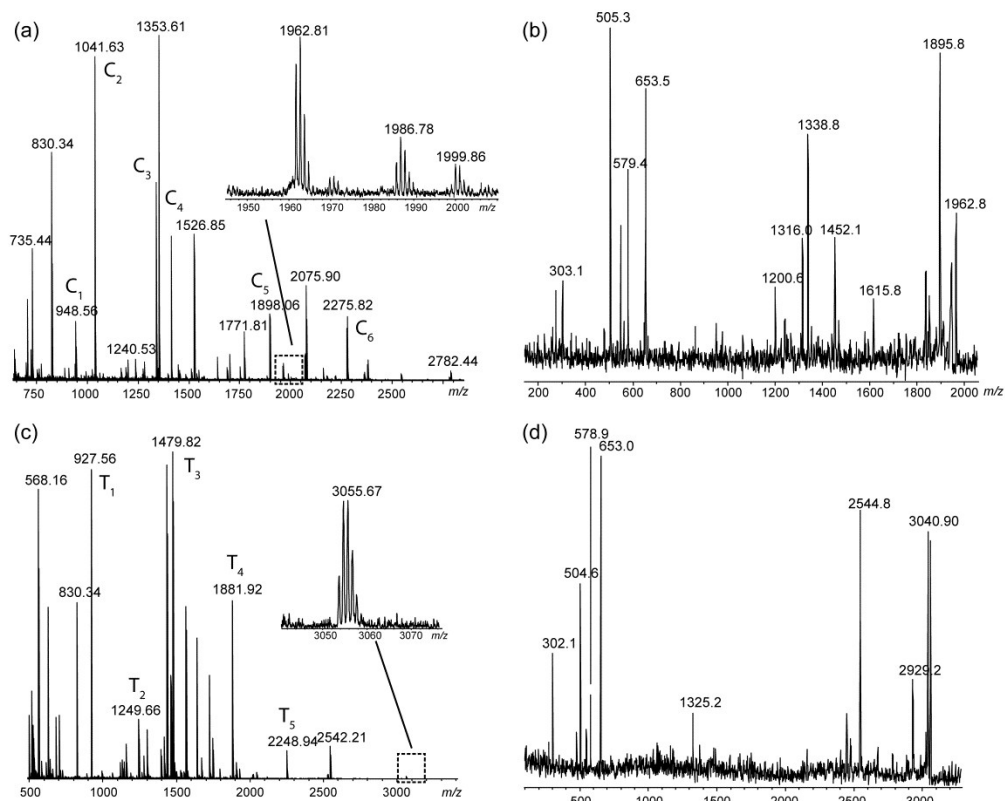

**a)** MALDI mass spectrum of chymotrypsin digest of modified BSA (CHCA matrix - C<sub>n</sub> : chymotryptic peptides.) The enlargement of the *m/z* 1950-2010 range showing the chymotryptic peptide at *m/z* 1961.82 containing the fluorophore group is on the top right of the figure. **b)** MALDI-MS/MS spectrum of the precursor ion at *m/z* 1961.82. The fragment ions at *m/z* 303.1, 505.3, 579.4 and 653.5 are specific of the fluorophore group. **c)** MALDI mass spectrum of trypsin digest of modified BSA (CHCA matrix - T<sub>n</sub> : tryptic peptides.) The enlargement of the *m/z* 3040-3070 range showing the tryptic peptide at *m/z* 3053.67 containing the fluorophore group is on the top right of the figure. **d)** MALDI-MS/MS spectrum of the precursor ion at *m/z* 3053.67. The fragment ions at *m/z* 302.1, 504.6, 578.9 and 653.0 are specific of the fluorophore group.

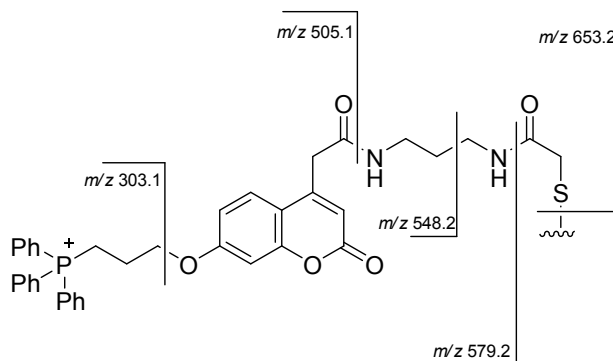

Fragment ions of the fluorophore group.
